# Supplementary material for: First Comparative Transcriptomic Analysis of Wild Adult Male and Female Lutzomyia longipalpis, Vector of Visceral Leishmaniasis
Source: PLoS One. 2013 Mar 12;8(3):e58645. doi: 10.1371/journal.pone.0058645 (PMC3595279; doi:10.1371/journal.pone.0058645)
Supplement: Table S16 — SS1_selected-mapped-reads_uniprotKB. This table shows the homology search results against DB:uniprotKB for SS1 selected mapped-reads. The provided information includes: mapped-read number; unique read name (name assigned to each read when the samples were pyrosequenced); read length; BlastX result against DB:uniprotKB; and its score and E-value, when applicable. (XLS) [file pone.0058645.s016.xls]

## Sheet: Sheet1
Mapped-read number	Unique read name	Read length	Blastx result (DB:uniprotKB)	Score and E-value
mapped-read 34793	F1UMNMG01CNZVU	Length=2020	tr|Q2GLX1|Q2GLX1_CHAGB Putative uncharacterized protein OS=Chaetomium globosum (strain ATCC 6205 / CBS 148.51 / DSM 1962 / NBRC 6347 / NRRL 1970) GN=CHGG_11101 PE=4 SV=1Length=144	Score = 63.9 bits (154), Expect = 1e-007
mapped-read 34793	F1UMNMG01BWFCW	Length=186	tr|B4N5L0|B4N5L0_DROWI GK12697 OS=Drosophila willistoni GN=GK12697 PE=4 SV=1Length=182	Score = 76.6 bits (187), Expect = 2e-012
mapped-read 34793	F1UMNMG01CC8DX	Length=362	tr|B4N5L0|B4N5L0_DROWI GK12697 OS=Drosophila willistoni GN=GK12697 PE=4 SV=1Length=182	Score = 76.3 bits (186), Expect = 2e-012
mapped-read 34793	F1UMNMG01BEY0T	Length=366	tr|B4N5L0|B4N5L0_DROWI GK12697 OS=Drosophila willistoni GN=GK12697 PE=4 SV=1Length=182	Score = 76.3 bits (186), Expect = 2e-012
mapped-read 34793	F1UMNMG01B9P8O	Length=359	tr|B4N5L0|B4N5L0_DROWI GK12697 OS=Drosophila willistoni GN=GK12697 PE=4 SV=1Length=182	Score = 76.3 bits (186), Expect = 2e-012
mapped-read 34793	F1UMNMG01A26UZ	Length=531	tr|B4N5L0|B4N5L0_DROWI GK12697 OS=Drosophila willistoni GN=GK12697 PE=4 SV=1Length=182	Score = 76.6 bits (187), Expect = 2e-012
mapped-read 34793	F1UMNMG01BSAIZ	Length=576	tr|G7K0D2|G7K0D2_MEDTR Putative uncharacterized protein OS=Medicago truncatula GN=MTR_5g051000 PE=4 SV=1Length=1735	Score = 43.1 bits (100), Expect(4) = 2e-011
mapped-read 34793	F1UMNMG01B6WI9	Length=200	tr|B4N5L0|B4N5L0_DROWI GK12697 OS=Drosophila willistoni GN=GK12697 PE=4 SV=1Length=182	Score = 77.0 bits (188), Expect = 1e-012
mapped-read 34793	F1UMNMG01BZ7JH	Length=362	tr|B4N5L0|B4N5L0_DROWI GK12697 OS=Drosophila willistoni GN=GK12697 PE=4 SV=1Length=182	Score = 76.3 bits (186), Expect = 2e-012
mapped-read 34793	F1UMNMG01APNL8	Length=361	tr|B4N5L0|B4N5L0_DROWI GK12697 OS=Drosophila willistoni GN=GK12697 PE=4 SV=1Length=182	Score = 76.6 bits (187), Expect = 2e-012
mapped-read 34793	F1UMNMG01CG5L8	Length=364	tr|B4N5L0|B4N5L0_DROWI GK12697 OS=Drosophila willistoni GN=GK12697 PE=4 SV=1Length=182	Score = 76.3 bits (186), Expect = 2e-012
mapped-read 34793	F1UMNMG01CEROK	Length=188	tr|B4N5L0|B4N5L0_DROWI GK12697 OS=Drosophila willistoni GN=GK12697 PE=4 SV=1Length=182	Score = 76.6 bits (187), Expect = 2e-012
mapped-read 34793	F1UMNMG01BZF1K	Length=361	tr|B4N5L0|B4N5L0_DROWI GK12697 OS=Drosophila willistoni GN=GK12697 PE=4 SV=1Length=182	Score = 76.3 bits (186), Expect = 2e-012
mapped-read 34793	F1UMNMG01CKG3C	Length=189	tr|B4N5L0|B4N5L0_DROWI GK12697 OS=Drosophila willistoni GN=GK12697 PE=4 SV=1Length=182	Score = 77.0 bits (188), Expect = 1e-012
mapped-read 34793	F1UMNMG01CDI53	Length=361	tr|B4N5L0|B4N5L0_DROWI GK12697 OS=Drosophila willistoni GN=GK12697 PE=4 SV=1Length=182	Score = 76.3 bits (186), Expect = 2e-012
mapped-read 34793	F1UMNMG01A7Q88	Length=190	tr|B4N5L0|B4N5L0_DROWI GK12697 OS=Drosophila willistoni GN=GK12697 PE=4 SV=1Length=182	Score = 77.0 bits (188), Expect = 1e-012
mapped-read 34793	F1UMNMG01AW1TG	Length=359	tr|B4N5L0|B4N5L0_DROWI GK12697 OS=Drosophila willistoni GN=GK12697 PE=4 SV=1Length=182	Score = 76.3 bits (186), Expect = 2e-012
mapped-read 34793	F1UMNMG01APP10	Length=871	tr|B4N5L0|B4N5L0_DROWI GK12697 OS=Drosophila willistoni GN=GK12697 PE=4 SV=1Length=182	Score = 76.6 bits (187), Expect = 6e-012
mapped-read 34793	F1UMNMG01BTBMH	Length=189	tr|B4N5L0|B4N5L0_DROWI GK12697 OS=Drosophila willistoni GN=GK12697 PE=4 SV=1Length=182	Score = 77.0 bits (188), Expect = 1e-012
mapped-read 34793	F1UMNMG01APYTE	Length=446	tr|B4N5L0|B4N5L0_DROWI GK12697 OS=Drosophila willistoni GN=GK12697 PE=4 SV=1Length=182	Score = 76.6 bits (187), Expect = 2e-012
mapped-read 34793	F1UMNMG01A62WJ	Length=190	tr|B4N5L0|B4N5L0_DROWI GK12697 OS=Drosophila willistoni GN=GK12697 PE=4 SV=1Length=182	Score = 76.6 bits (187), Expect = 2e-012
mapped-read 34793	F1UMNMG01CEY3V	Length=191	tr|B4N5L0|B4N5L0_DROWI GK12697 OS=Drosophila willistoni GN=GK12697 PE=4 SV=1Length=182	Score = 76.6 bits (187), Expect = 2e-012
mapped-read 34793	F1UMNMG01BUB0M	Length=197	tr|B4N5L0|B4N5L0_DROWI GK12697 OS=Drosophila willistoni GN=GK12697 PE=4 SV=1Length=182	Score = 63.5 bits (153), Expect = 2e-008
mapped-read 34793	F1UMNMG01CAVUP	Length=187	tr|B4N5L0|B4N5L0_DROWI GK12697 OS=Drosophila willistoni GN=GK12697 PE=4 SV=1Length=182	Score = 76.6 bits (187), Expect = 2e-012
mapped-read 34793	F1UMNMG01CPK3F	Length=326	tr|B4N5L0|B4N5L0_DROWI GK12697 OS=Drosophila willistoni GN=GK12697 PE=4 SV=1Length=182	Score = 76.6 bits (187), Expect = 2e-012
mapped-read 34793	F1UMNMG01CF301	Length=201	tr|B4N5L0|B4N5L0_DROWI GK12697 OS=Drosophila willistoni GN=GK12697 PE=4 SV=1Length=182	Score = 76.6 bits (187), Expect = 2e-012
mapped-read 34793	F1UMNMG01A17RB	Length=362	tr|B4N5L0|B4N5L0_DROWI GK12697 OS=Drosophila willistoni GN=GK12697 PE=4 SV=1Length=182	Score = 76.3 bits (186), Expect = 2e-012
mapped-read 34793	F1UMNMG01A15YF	Length=587	tr|B4N5L0|B4N5L0_DROWI GK12697 OS=Drosophila willistoni GN=GK12697 PE=4 SV=1Length=182	Score = 76.6 bits (187), Expect = 3e-012
mapped-read 34793	F1UMNMG01A8YT5	Length=613	tr|Q5BT34|Q5BT34_SCHJA Putative uncharacterized protein OS=Schistosoma japonicum PE=4 SV=1Length=55	Score = 104 bits (260), Expect = 1e-020
mapped-read 34793	F1UMNMG01AX6I6	Length=539	tr|B4N5L0|B4N5L0_DROWI GK12697 OS=Drosophila willistoni GN=GK12697 PE=4 SV=1Length=182	Score = 76.6 bits (187), Expect = 2e-012
mapped-read 34793	F1UMNMG01A4RPB	Length=489	tr|C5Y2D6|C5Y2D6_SORBI Putative uncharacterized protein Sb05g016477 (Fragment) OS=Sorghum bicolor GN=Sb05g016477 PE=4 SV=1Length=149	Score = 84.3 bits (207), Expect = 8e-015
mapped-read 34793	F1UMNMG01B9FUU	Length=190	tr|B4N5L0|B4N5L0_DROWI GK12697 OS=Drosophila willistoni GN=GK12697 PE=4 SV=1Length=182	Score = 76.6 bits (187), Expect = 2e-012
mapped-read 34793	F1UMNMG01BSKNZ	Length=551	tr|B4N5L0|B4N5L0_DROWI GK12697 OS=Drosophila willistoni GN=GK12697 PE=4 SV=1Length=182	Score = 66.2 bits (160), Expect = 3e-009
mapped-read 34793	F1UMNMG01BE17Q	Length=189	tr|B4N5L0|B4N5L0_DROWI GK12697 OS=Drosophila willistoni GN=GK12697 PE=4 SV=1Length=182	Score = 58.5 bits (140), Expect(2) = 7e-008
mapped-read 34793	F1UMNMG01BVZ48	Length=671	tr|Q5BT34|Q5BT34_SCHJA Putative uncharacterized protein OS=Schistosoma japonicum PE=4 SV=1Length=55	Score = 107 bits (267), Expect = 2e-021
mapped-read 34793	F1UMNMG01CKA1C	Length=200	tr|B4N5L0|B4N5L0_DROWI GK12697 OS=Drosophila willistoni GN=GK12697 PE=4 SV=1Length=182	Score = 76.6 bits (187), Expect = 2e-012
mapped-read 34793	F1UMNMG01B7KKC	Length=592	tr|B4N5L0|B4N5L0_DROWI GK12697 OS=Drosophila willistoni GN=GK12697 PE=4 SV=1Length=182	Score = 61.2 bits (147), Expect = 1e-007
mapped-read 34793	F1UMNMG01COJWI	Length=186	tr|B4N5L0|B4N5L0_DROWI GK12697 OS=Drosophila willistoni GN=GK12697 PE=4 SV=1Length=182	Score = 58.2 bits (139), Expect = 6e-007
mapped-read 34793	F1UMNMG01COIQ7	Length=190	tr|B4N5L0|B4N5L0_DROWI GK12697 OS=Drosophila willistoni GN=GK12697 PE=4 SV=1Length=182	Score = 76.6 bits (187), Expect = 2e-012
mapped-read 34793	F1UMNMG01A4L5F	Length=187	tr|B4N5L0|B4N5L0_DROWI GK12697 OS=Drosophila willistoni GN=GK12697 PE=4 SV=1Length=182	Score = 76.6 bits (187), Expect = 2e-012
mapped-read 34793	F1UMNMG01CIDBU	Length=353	tr|B4N5L0|B4N5L0_DROWI GK12697 OS=Drosophila willistoni GN=GK12697 PE=4 SV=1Length=182	Score = 76.6 bits (187), Expect = 2e-012
mapped-read 34793	F1UMNMG01B8M3B	Length=556	tr|B4N5L0|B4N5L0_DROWI GK12697 OS=Drosophila willistoni GN=GK12697 PE=4 SV=1Length=182	Score = 76.6 bits (187), Expect = 2e-012
mapped-read 34793	F1UMNMG01CCTQO	Length=190	tr|B4N5L0|B4N5L0_DROWI GK12697 OS=Drosophila willistoni GN=GK12697 PE=4 SV=1Length=182	Score = 76.6 bits (187), Expect = 2e-012
mapped-read 34793	F1UMNMG01CAX8Q	Length=575	tr|C5Y2D6|C5Y2D6_SORBI Putative uncharacterized protein Sb05g016477 (Fragment) OS=Sorghum bicolor GN=Sb05g016477 PE=4 SV=1Length=149	Score = 84.3 bits (207), Expect = 1e-014
mapped-read 34793	F1UMNMG01B342K	Length=670	tr|B4N5L0|B4N5L0_DROWI GK12697 OS=Drosophila willistoni GN=GK12697 PE=4 SV=1Length=182	Score = 76.6 bits (187), Expect = 4e-012
mapped-read 34793	F1UMNMG01BZXSV	Length=189	tr|B4N5L0|B4N5L0_DROWI GK12697 OS=Drosophila willistoni GN=GK12697 PE=4 SV=1Length=182	Score = 76.6 bits (187), Expect = 2e-012
mapped-read 34793	F1UMNMG01A2IDF	Length=186	tr|B4N5L0|B4N5L0_DROWI GK12697 OS=Drosophila willistoni GN=GK12697 PE=4 SV=1Length=182	Score = 63.5 bits (153), Expect = 2e-008
mapped-read 34793	F1UMNMG01BNYC4	Length=187	tr|B4N5L0|B4N5L0_DROWI GK12697 OS=Drosophila willistoni GN=GK12697 PE=4 SV=1Length=182	Score = 77.8 bits (190), Expect = 8e-013
mapped-read 34793	F1UMNMG01CLL19	Length=229	tr|Q5BT34|Q5BT34_SCHJA Putative uncharacterized protein OS=Schistosoma japonicum PE=4 SV=1Length=55	Score = 107 bits (267), Expect = 9e-022
mapped-read 34793	F1UMNMG01A2A1Y	Length=521	tr|C5Y2D6|C5Y2D6_SORBI Putative uncharacterized protein Sb05g016477 (Fragment) OS=Sorghum bicolor GN=Sb05g016477 PE=4 SV=1Length=149	Score = 80.9 bits (198), Expect = 9e-014
mapped-read 34793	F1UMNMG01CJUM2	Length=817	tr|B4N5L0|B4N5L0_DROWI GK12697 OS=Drosophila willistoni GN=GK12697 PE=4 SV=1Length=182	Score = 72.0 bits (175), Expect = 1e-010
mapped-read 34793	F1UMNMG01CC7XG	Length=186	tr|B4N5L0|B4N5L0_DROWI GK12697 OS=Drosophila willistoni GN=GK12697 PE=4 SV=1Length=182	Score = 76.6 bits (187), Expect = 2e-012
mapped-read 34793	F1UMNMG01A29J9	Length=770	No Hit
mapped-read 34793	F1UMNMG01BE42A	Length=228	tr|B4N5L0|B4N5L0_DROWI GK12697 OS=Drosophila willistoni GN=GK12697 PE=4 SV=1Length=182	Score = 76.6 bits (187), Expect = 2e-012
mapped-read 34793	F1UMNMG01B2G8I	Length=214	tr|B4N5L0|B4N5L0_DROWI GK12697 OS=Drosophila willistoni GN=GK12697 PE=4 SV=1Length=182	Score = 76.6 bits (187), Expect = 2e-012
mapped-read 34793	F1UMNMG01BYIZ6	Length=362	No Hit
mapped-read 34793	F1UMNMG01CM2I8	Length=188	tr|B4N5L0|B4N5L0_DROWI GK12697 OS=Drosophila willistoni GN=GK12697 PE=4 SV=1Length=182	Score = 76.6 bits (187), Expect = 2e-012
mapped-read 34793	F1UMNMG01A8MR1	Length=687	No Hit
mapped-read 34793	F1UMNMG01CAA34	Length=362	tr|B4N5L0|B4N5L0_DROWI GK12697 OS=Drosophila willistoni GN=GK12697 PE=4 SV=1Length=182	Score = 76.3 bits (186), Expect = 2e-012
mapped-read 34793	F1UMNMG01BMCWW	Length=326	tr|B4N5L0|B4N5L0_DROWI GK12697 OS=Drosophila willistoni GN=GK12697 PE=4 SV=1Length=182	Score = 76.6 bits (187), Expect = 2e-012
mapped-read 34793	F1UMNMG01B38B5	Length=317	No Hit
mapped-read 34793	F1UMNMG01CJATC	Length=495	tr|F4SCC1|F4SCC1_MELLP Putative uncharacterized protein OS=Melampsora larici-populina (strain 98AG31 / pathotype 3-4-7) GN=MELLADRAFT_84525 PE=4 SV=1Length=347	Score = 77.0 bits (188), Expect = 1e-012
mapped-read 34793	F1UMNMG01CJLJ1	Length=194	tr|B4N5L0|B4N5L0_DROWI GK12697 OS=Drosophila willistoni GN=GK12697 PE=4 SV=1Length=182	Score = 77.0 bits (188), Expect = 1e-012
mapped-read 34793	F1UMNMG01CAUI9	Length=188	tr|B4N5L0|B4N5L0_DROWI GK12697 OS=Drosophila willistoni GN=GK12697 PE=4 SV=1Length=182	Score = 76.6 bits (187), Expect = 2e-012
mapped-read 34793	F1UMNMG01A53K3	Length=325	tr|B4N5L0|B4N5L0_DROWI GK12697 OS=Drosophila willistoni GN=GK12697 PE=4 SV=1Length=182	Score = 76.6 bits (187), Expect = 2e-012
mapped-read 34793	F1UMNMG01A0SFK	Length=364	tr|B4N5L0|B4N5L0_DROWI GK12697 OS=Drosophila willistoni GN=GK12697 PE=4 SV=1Length=182	Score = 67.0 bits (162), Expect = 1e-009
mapped-read 34793	F1UMNMG01CK8GJ	Length=779	tr|B4N5L0|B4N5L0_DROWI GK12697 OS=Drosophila willistoni GN=GK12697 PE=4 SV=1Length=182	Score = 76.6 bits (187), Expect = 5e-012
mapped-read 34793	F1UMNMG01B9OSH	Length=479	tr|E9HZ42|E9HZ42_DAPPU Putative uncharacterized protein (Fragment) OS=Daphnia pulex GN=DAPPUDRAFT_37179 PE=4 SV=1Length=105	Score = 72.4 bits (176), Expect = 3e-011
mapped-read 34793	F1UMNMG01BKERV	Length=224	tr|B4N5L0|B4N5L0_DROWI GK12697 OS=Drosophila willistoni GN=GK12697 PE=4 SV=1Length=182	Score = 76.6 bits (187), Expect = 2e-012
mapped-read 34793	F1UMNMG01BW4GK	Length=526	tr|F4SCC1|F4SCC1_MELLP Putative uncharacterized protein OS=Melampsora larici-populina (strain 98AG31 / pathotype 3-4-7) GN=MELLADRAFT_84525 PE=4 SV=1Length=347	Score = 77.8 bits (190), Expect(2) = 8e-021
mapped-read 34793	F1UMNMG01CL26S	Length=362	No Hit
mapped-read 34793	F1UMNMG01BDNLN	Length=350	No Hit
mapped-read 34793	F1UMNMG01BSY36	Length=659	tr|B4N5L0|B4N5L0_DROWI GK12697 OS=Drosophila willistoni GN=GK12697 PE=4 SV=1Length=182	Score = 76.6 bits (187), Expect = 3e-012
mapped-read 34793	F1UMNMG01CB249	Length=187	tr|B4N5L0|B4N5L0_DROWI GK12697 OS=Drosophila willistoni GN=GK12697 PE=4 SV=1Length=182	Score = 76.6 bits (187), Expect = 2e-012
mapped-read 34793	F1UMNMG01BYYPX	Length=187	tr|B4N5L0|B4N5L0_DROWI GK12697 OS=Drosophila willistoni GN=GK12697 PE=4 SV=1Length=182	Score = 77.8 bits (190), Expect = 8e-013
mapped-read 34793	F1UMNMG01CCO6H	Length=206	tr|B4N5L0|B4N5L0_DROWI GK12697 OS=Drosophila willistoni GN=GK12697 PE=4 SV=1Length=182	Score = 76.6 bits (187), Expect = 2e-012
mapped-read 34793	F1UMNMG01BRRAS	Length=839	tr|B8LLL2|B8LLL2_PICSI Putative uncharacterized protein OS=Picea sitchensis PE=4 SV=1Length=55	Score = 73.6 bits (179), Expect = 5e-011
mapped-read 34793	F1UMNMG01BTZKI	Length=204	tr|Q5BT34|Q5BT34_SCHJA Putative uncharacterized protein OS=Schistosoma japonicum PE=4 SV=1Length=55	Score = 75.9 bits (185), Expect = 3e-012
mapped-read 34793	F1UMNMG01AUX5E	Length=215	tr|Q5BT34|Q5BT34_SCHJA Putative uncharacterized protein OS=Schistosoma japonicum PE=4 SV=1Length=55	Score = 98.6 bits (244), Expect = 4e-019
mapped-read 34793	F1UMNMG01BXBZW	Length=204	tr|B4N5L0|B4N5L0_DROWI GK12697 OS=Drosophila willistoni GN=GK12697 PE=4 SV=1Length=182	Score = 76.6 bits (187), Expect = 2e-012
mapped-read 34793	F1UMNMG01BROLC	Length=619	tr|B4N5L0|B4N5L0_DROWI GK12697 OS=Drosophila willistoni GN=GK12697 PE=4 SV=1Length=182	Score = 76.6 bits (187), Expect = 3e-012
mapped-read 34793	F1UMNMG01A94CD	Length=301	tr|B4N5L0|B4N5L0_DROWI GK12697 OS=Drosophila willistoni GN=GK12697 PE=4 SV=1Length=182	Score = 76.6 bits (187), Expect = 2e-012
mapped-read 34793	F1UMNMG01CHBT5	Length=347	No Hit
mapped-read 34793	F1UMNMG01CH4XL	Length=229	tr|B4N5L0|B4N5L0_DROWI GK12697 OS=Drosophila willistoni GN=GK12697 PE=4 SV=1Length=182	Score = 77.0 bits (188), Expect = 1e-012
mapped-read 34793	F1UMNMG01B5ELC	Length=189	tr|B4N5L0|B4N5L0_DROWI GK12697 OS=Drosophila willistoni GN=GK12697 PE=4 SV=1Length=182	Score = 76.6 bits (187), Expect = 2e-012
mapped-read 34793	F1UMNMG01CBE5Y	Length=190	tr|B4N5L0|B4N5L0_DROWI GK12697 OS=Drosophila willistoni GN=GK12697 PE=4 SV=1Length=182	Score = 76.6 bits (187), Expect = 2e-012
mapped-read 34793	F1UMNMG01CBSY6	Length=329	No Hit
mapped-read 34793	F1UMNMG01CKGPN	Length=189	tr|B4N5L0|B4N5L0_DROWI GK12697 OS=Drosophila willistoni GN=GK12697 PE=4 SV=1Length=182	Score = 75.1 bits (183), Expect = 5e-012
mapped-read 34793	F1UMNMG01CG2Q9	Length=186	tr|B4N5L0|B4N5L0_DROWI GK12697 OS=Drosophila willistoni GN=GK12697 PE=4 SV=1Length=182	Score = 75.1 bits (183), Expect = 5e-012
mapped-read 34793	F1UMNMG01BYYR6	Length=535	tr|B4N5L0|B4N5L0_DROWI GK12697 OS=Drosophila willistoni GN=GK12697 PE=4 SV=1Length=182	Score = 76.3 bits (186), Expect = 3e-012
mapped-read 34793	F1UMNMG01BHLOP	Length=325	tr|B4N5L0|B4N5L0_DROWI GK12697 OS=Drosophila willistoni GN=GK12697 PE=4 SV=1Length=182	Score = 76.6 bits (187), Expect = 2e-012
mapped-read 34793	F1UMNMG01BYEMO	Length=518	tr|G7E0M2|G7E0M2_MIXOS Putative uncharacterized protein Mo03049 OS=Mixia osmundae (strain CBS 9802 / IAM 14324 / JCM 22182 / KY 12970) GN=Mo03049 PE=4 SV=1Length=352	Score = 102 bits (254), Expect = 3e-020
mapped-read 34793	F1UMNMG01CHXK1	Length=187	tr|B4N5L0|B4N5L0_DROWI GK12697 OS=Drosophila willistoni GN=GK12697 PE=4 SV=1Length=182	Score = 77.0 bits (188), Expect = 1e-012
mapped-read 34793	F1UMNMG01B5TC9	Length=588	No Hit
mapped-read 34793	F1UMNMG01B6HNQ	Length=528	tr|B4N5L0|B4N5L0_DROWI GK12697 OS=Drosophila willistoni GN=GK12697 PE=4 SV=1Length=182	Score = 76.6 bits (187), Expect = 2e-012
mapped-read 34793	F1UMNMG01B36DS	Length=493	tr|F4SCC1|F4SCC1_MELLP Putative uncharacterized protein OS=Melampsora larici-populina (strain 98AG31 / pathotype 3-4-7) GN=MELLADRAFT_84525 PE=4 SV=1Length=347	Score = 77.0 bits (188), Expect = 1e-012
mapped-read 34793	F1UMNMG01APS4G	Length=622	tr|B4N5L0|B4N5L0_DROWI GK12697 OS=Drosophila willistoni GN=GK12697 PE=4 SV=1Length=182	Score = 76.6 bits (187), Expect = 3e-012
mapped-read 34793	F1UMNMG01CA3NJ	Length=522	tr|F4S2J1|F4S2J1_MELLP Putative uncharacterized protein OS=Melampsora larici-populina (strain 98AG31 / pathotype 3-4-7) GN=MELLADRAFT_92705 PE=4 SV=1Length=113	Score = 86.3 bits (212), Expect(2) = 3e-017
mapped-read 34793	F1UMNMG01COFLD	Length=189	tr|B4N5L0|B4N5L0_DROWI GK12697 OS=Drosophila willistoni GN=GK12697 PE=4 SV=1Length=182	Score = 76.6 bits (187), Expect = 2e-012
mapped-read 34793	F1UMNMG01BJCQH	Length=520	tr|B0WSK5|B0WSK5_CULQU GLP_748_1200_211 (Fragment) OS=Culex quinquefasciatus GN=CpipJ_CPIJ010238 PE=4 SV=1Length=51	Score = 62.8 bits (151), Expect(2) = 3e-014
mapped-read 34793	F1UMNMG01CFU2F	Length=194	tr|B4N5L0|B4N5L0_DROWI GK12697 OS=Drosophila willistoni GN=GK12697 PE=4 SV=1Length=182	Score = 76.6 bits (187), Expect = 2e-012
mapped-read 34793	F1UMNMG01CKFKX	Length=195	tr|Q5BT34|Q5BT34_SCHJA Putative uncharacterized protein OS=Schistosoma japonicum PE=4 SV=1Length=55	Score = 73.2 bits (178), Expect = 2e-011
mapped-read 34793	F1UMNMG01CDTEY	Length=193	tr|B4N5L0|B4N5L0_DROWI GK12697 OS=Drosophila willistoni GN=GK12697 PE=4 SV=1Length=182	Score = 76.6 bits (187), Expect = 2e-012
mapped-read 34793	F1UMNMG01BDMT2	Length=230	tr|Q5BT34|Q5BT34_SCHJA Putative uncharacterized protein OS=Schistosoma japonicum PE=4 SV=1Length=55	Score = 99.0 bits (245), Expect = 3e-019
mapped-read 34793	F1UMNMG01AVAE5	Length=635	tr|B4N5L0|B4N5L0_DROWI GK12697 OS=Drosophila willistoni GN=GK12697 PE=4 SV=1Length=182	Score = 76.6 bits (187), Expect = 3e-012
mapped-read 34793	F1UMNMG01BS9LW	Length=336	No Hit
mapped-read 34793	F1UMNMG01BZTN2	Length=186	tr|B4N5L0|B4N5L0_DROWI GK12697 OS=Drosophila willistoni GN=GK12697 PE=4 SV=1Length=182	Score = 75.1 bits (183), Expect = 5e-012
mapped-read 34793	F1UMNMG01CGIVC	Length=190	tr|B4N5L0|B4N5L0_DROWI GK12697 OS=Drosophila willistoni GN=GK12697 PE=4 SV=1Length=182	Score = 76.6 bits (187), Expect = 2e-012
mapped-read 34793	F1UMNMG01BUXX9	Length=785	tr|B4N5L0|B4N5L0_DROWI GK12697 OS=Drosophila willistoni GN=GK12697 PE=4 SV=1Length=182	Score = 76.6 bits (187), Expect = 5e-012
mapped-read 34793	F1UMNMG01A3SRZ	Length=530	tr|B4N5L0|B4N5L0_DROWI GK12697 OS=Drosophila willistoni GN=GK12697 PE=4 SV=1Length=182	Score = 76.6 bits (187), Expect = 2e-012
mapped-read 34793	F1UMNMG01B42EX	Length=188	tr|B4N5L0|B4N5L0_DROWI GK12697 OS=Drosophila willistoni GN=GK12697 PE=4 SV=1Length=182	Score = 76.6 bits (187), Expect = 2e-012
mapped-read 34793	F1UMNMG01CLT7I	Length=193	tr|B4N5L0|B4N5L0_DROWI GK12697 OS=Drosophila willistoni GN=GK12697 PE=4 SV=1Length=182	Score = 76.6 bits (187), Expect = 2e-012
mapped-read 34793	F1UMNMG01BWW50	Length=176	tr|B4N5L0|B4N5L0_DROWI GK12697 OS=Drosophila willistoni GN=GK12697 PE=4 SV=1Length=182	Score = 74.3 bits (181), Expect = 8e-012
mapped-read 34793	F1UMNMG01CJ5TB	Length=186	tr|B4N5L0|B4N5L0_DROWI GK12697 OS=Drosophila willistoni GN=GK12697 PE=4 SV=1Length=182	Score = 75.1 bits (183), Expect = 5e-012
mapped-read 34793	F1UMNMG01BSTU3	Length=346	tr|B4N5L0|B4N5L0_DROWI GK12697 OS=Drosophila willistoni GN=GK12697 PE=4 SV=1Length=182	Score = 76.6 bits (187), Expect = 2e-012
mapped-read 34793	F1UMNMG01BBWV6	Length=1080	No Hit
mapped-read 34793	F1UMNMG01CAHFR	Length=848	tr|B4N5L0|B4N5L0_DROWI GK12697 OS=Drosophila willistoni GN=GK12697 PE=4 SV=1Length=182	Score = 76.6 bits (187), Expect = 6e-012
mapped-read 34793	F1UMNMG01A7BM8	Length=625	tr|B4N5L0|B4N5L0_DROWI GK12697 OS=Drosophila willistoni GN=GK12697 PE=4 SV=1Length=182	Score = 76.6 bits (187), Expect = 3e-012
mapped-read 34793	F1UMNMG01CFK0H	Length=362	No Hit
mapped-read 34793	F1UMNMG01BEG6Q	Length=1100	tr|A7RYT6|A7RYT6_NEMVE Predicted protein OS=Nematostella vectensis GN=v1g223461 PE=4 SV=1Length=49	Score = 73.6 bits (179), Expect = 7e-011
mapped-read 34793	F1UMNMG01B2BJP	Length=193	tr|B4N5L0|B4N5L0_DROWI GK12697 OS=Drosophila willistoni GN=GK12697 PE=4 SV=1Length=182	Score = 76.6 bits (187), Expect = 2e-012
mapped-read 34793	F1UMNMG01BKKWZ	Length=360	tr|B4N5L0|B4N5L0_DROWI GK12697 OS=Drosophila willistoni GN=GK12697 PE=4 SV=1Length=182	Score = 76.6 bits (187), Expect = 2e-012
mapped-read 34793	F1UMNMG01BMX7F	Length=190	tr|B4N5L0|B4N5L0_DROWI GK12697 OS=Drosophila willistoni GN=GK12697 PE=4 SV=1Length=182	Score = 76.6 bits (187), Expect = 2e-012
mapped-read 34793	F1UMNMG01BZNBK	Length=229	tr|B4N5L0|B4N5L0_DROWI GK12697 OS=Drosophila willistoni GN=GK12697 PE=4 SV=1Length=182	Score = 76.6 bits (187), Expect = 2e-012
mapped-read 34793	F1UMNMG01CK7OW	Length=185	tr|B4N5L0|B4N5L0_DROWI GK12697 OS=Drosophila willistoni GN=GK12697 PE=4 SV=1Length=182	Score = 76.6 bits (187), Expect = 2e-012
mapped-read 34793	F1UMNMG01CAZIF	Length=189	tr|B4N5L0|B4N5L0_DROWI GK12697 OS=Drosophila willistoni GN=GK12697 PE=4 SV=1Length=182	Score = 76.6 bits (187), Expect = 2e-012
mapped-read 34793	F1UMNMG01B7JPH	Length=205	tr|Q5BT34|Q5BT34_SCHJA Putative uncharacterized protein OS=Schistosoma japonicum PE=4 SV=1Length=55	Score = 75.9 bits (185), Expect = 3e-012
mapped-read 34793	F1UMNMG01ARZH6	Length=718	tr|B4N5L0|B4N5L0_DROWI GK12697 OS=Drosophila willistoni GN=GK12697 PE=4 SV=1Length=182	Score = 76.6 bits (187), Expect = 4e-012
mapped-read 34793	F1UMNMG01BPKJ4	Length=202	tr|B4N5L0|B4N5L0_DROWI GK12697 OS=Drosophila willistoni GN=GK12697 PE=4 SV=1Length=182	Score = 76.6 bits (187), Expect = 2e-012
mapped-read 34793	F1UMNMG01CNZQA	Length=196	tr|B4N5L0|B4N5L0_DROWI GK12697 OS=Drosophila willistoni GN=GK12697 PE=4 SV=1Length=182	Score = 76.6 bits (187), Expect = 2e-012
mapped-read 34793	F1UMNMG01CMMMP	Length=308	tr|B4N5L0|B4N5L0_DROWI GK12697 OS=Drosophila willistoni GN=GK12697 PE=4 SV=1Length=182	Score = 76.6 bits (187), Expect = 2e-012
mapped-read 34793	F1UMNMG01B5DBN	Length=195	tr|B4N5L0|B4N5L0_DROWI GK12697 OS=Drosophila willistoni GN=GK12697 PE=4 SV=1Length=182	Score = 76.6 bits (187), Expect = 2e-012
mapped-read 34793	F1UMNMG01BPVU7	Length=305	tr|B4N5L0|B4N5L0_DROWI GK12697 OS=Drosophila willistoni GN=GK12697 PE=4 SV=1Length=182	Score = 76.6 bits (187), Expect = 2e-012
mapped-read 34793	F1UMNMG01CKG5U	Length=196	tr|B4N5L0|B4N5L0_DROWI GK12697 OS=Drosophila willistoni GN=GK12697 PE=4 SV=1Length=182	Score = 76.6 bits (187), Expect = 2e-012
mapped-read 34793	F1UMNMG01CMBLC	Length=238	tr|B4N5L0|B4N5L0_DROWI GK12697 OS=Drosophila willistoni GN=GK12697 PE=4 SV=1Length=182	Score = 76.6 bits (187), Expect = 2e-012
mapped-read 34793	F1UMNMG01BAHDP	Length=188	tr|B4N5L0|B4N5L0_DROWI GK12697 OS=Drosophila willistoni GN=GK12697 PE=4 SV=1Length=182	Score = 76.6 bits (187), Expect = 2e-012
mapped-read 34793	F1UMNMG01B5KLO	Length=186	tr|B4N5L0|B4N5L0_DROWI GK12697 OS=Drosophila willistoni GN=GK12697 PE=4 SV=1Length=182	Score = 77.0 bits (188), Expect = 1e-012
mapped-read 34793	F1UMNMG01B4UB5	Length=187	tr|B4N5L0|B4N5L0_DROWI GK12697 OS=Drosophila willistoni GN=GK12697 PE=4 SV=1Length=182	Score = 76.6 bits (187), Expect = 2e-012
mapped-read 34793	F1UMNMG01CHFHO	Length=315	tr|B4N5L0|B4N5L0_DROWI GK12697 OS=Drosophila willistoni GN=GK12697 PE=4 SV=1Length=182	Score = 76.6 bits (187), Expect = 2e-012
mapped-read 34793	F1UMNMG01CIPJF	Length=188	tr|B4N5L0|B4N5L0_DROWI GK12697 OS=Drosophila willistoni GN=GK12697 PE=4 SV=1Length=182	Score = 77.0 bits (188), Expect = 1e-012
mapped-read 34793	F1UMNMG01AUAFL	Length=188	tr|B4N5L0|B4N5L0_DROWI GK12697 OS=Drosophila willistoni GN=GK12697 PE=4 SV=1Length=182	Score = 76.6 bits (187), Expect = 2e-012
mapped-read 34793	F1UMNMG01B1SMQ	Length=188	tr|B4N5L0|B4N5L0_DROWI GK12697 OS=Drosophila willistoni GN=GK12697 PE=4 SV=1Length=182	Score = 76.6 bits (187), Expect = 2e-012
mapped-read 34793	F1UMNMG01BBQTW	Length=445	No Hit
mapped-read 34793	F1UMNMG01BWSWS	Length=188	tr|B4N5L0|B4N5L0_DROWI GK12697 OS=Drosophila willistoni GN=GK12697 PE=4 SV=1Length=182	Score = 77.0 bits (188), Expect = 1e-012
mapped-read 34793	F1UMNMG01AQX1D	Length=191	tr|B4N5L0|B4N5L0_DROWI GK12697 OS=Drosophila willistoni GN=GK12697 PE=4 SV=1Length=182	Score = 58.5 bits (140), Expect(2) = 7e-008
mapped-read 34793	F1UMNMG01CCWZ0	Length=495	tr|B4N5L0|B4N5L0_DROWI GK12697 OS=Drosophila willistoni GN=GK12697 PE=4 SV=1Length=182	Score = 76.6 bits (187), Expect = 2e-012
mapped-read 34793	F1UMNMG01B5H1R	Length=192	tr|B4N5L0|B4N5L0_DROWI GK12697 OS=Drosophila willistoni GN=GK12697 PE=4 SV=1Length=182	Score = 76.6 bits (187), Expect = 2e-012
mapped-read 34793	F1UMNMG01ARM6O	Length=503	tr|Q5BT34|Q5BT34_SCHJA Putative uncharacterized protein OS=Schistosoma japonicum PE=4 SV=1Length=55	Score = 61.2 bits (147), Expect = 7e-008
mapped-read 34793	F1UMNMG01BSRNB	Length=242	tr|Q5BT34|Q5BT34_SCHJA Putative uncharacterized protein OS=Schistosoma japonicum PE=4 SV=1Length=55	Score = 104 bits (260), Expect = 6e-021
mapped-read 34793	F1UMNMG01CJAEN	Length=199	tr|Q5BT34|Q5BT34_SCHJA Putative uncharacterized protein OS=Schistosoma japonicum PE=4 SV=1Length=55	Score = 75.9 bits (185), Expect = 3e-012
mapped-read 34793	F1UMNMG01A5G4A	Length=362	tr|B4N5L0|B4N5L0_DROWI GK12697 OS=Drosophila willistoni GN=GK12697 PE=4 SV=1Length=182	Score = 73.9 bits (180), Expect = 1e-011
mapped-read 34793	F1UMNMG01BTWUP	Length=189	tr|B4N5L0|B4N5L0_DROWI GK12697 OS=Drosophila willistoni GN=GK12697 PE=4 SV=1Length=182	Score = 76.6 bits (187), Expect = 2e-012
mapped-read 34793	F1UMNMG01BWVWS	Length=583	tr|B4N5L0|B4N5L0_DROWI GK12697 OS=Drosophila willistoni GN=GK12697 PE=4 SV=1Length=182	Score = 76.6 bits (187), Expect = 2e-012
mapped-read 34793	F1UMNMG01BQEPY	Length=190	tr|B4N5L0|B4N5L0_DROWI GK12697 OS=Drosophila willistoni GN=GK12697 PE=4 SV=1Length=182	Score = 76.6 bits (187), Expect = 2e-012
mapped-read 34793	F1UMNMG01B9PX9	Length=189	tr|B4N5L0|B4N5L0_DROWI GK12697 OS=Drosophila willistoni GN=GK12697 PE=4 SV=1Length=182	Score = 76.6 bits (187), Expect = 2e-012
mapped-read 34793	F1UMNMG01BVRWH	Length=189	tr|B4N5L0|B4N5L0_DROWI GK12697 OS=Drosophila willistoni GN=GK12697 PE=4 SV=1Length=182	Score = 76.6 bits (187), Expect = 2e-012
mapped-read 34793	F1UMNMG01CL2U2	Length=188	tr|B4N5L0|B4N5L0_DROWI GK12697 OS=Drosophila willistoni GN=GK12697 PE=4 SV=1Length=182	Score = 77.0 bits (188), Expect = 1e-012
mapped-read 34793	F1UMNMG01CH61T	Length=189	tr|B4N5L0|B4N5L0_DROWI GK12697 OS=Drosophila willistoni GN=GK12697 PE=4 SV=1Length=182	Score = 76.6 bits (187), Expect = 2e-012
mapped-read 34793	F1UMNMG01B2VDA	Length=203	tr|Q5BT34|Q5BT34_SCHJA Putative uncharacterized protein OS=Schistosoma japonicum PE=4 SV=1Length=55	Score = 75.9 bits (185), Expect = 3e-012
mapped-read 34793	F1UMNMG01CI6G5	Length=289	tr|B4N5L0|B4N5L0_DROWI GK12697 OS=Drosophila willistoni GN=GK12697 PE=4 SV=1Length=182	Score = 76.6 bits (187), Expect = 2e-012
mapped-read 34793	F1UMNMG01B7VFT	Length=171	tr|B4N5L0|B4N5L0_DROWI GK12697 OS=Drosophila willistoni GN=GK12697 PE=4 SV=1Length=182	Score = 74.3 bits (181), Expect = 9e-012
mapped-read 34793	F1UMNMG01CALY2	Length=188	tr|B4N5L0|B4N5L0_DROWI GK12697 OS=Drosophila willistoni GN=GK12697 PE=4 SV=1Length=182	Score = 76.6 bits (187), Expect = 2e-012
mapped-read 34793	F1UMNMG01B0ZJP	Length=193	tr|Q5BT34|Q5BT34_SCHJA Putative uncharacterized protein OS=Schistosoma japonicum PE=4 SV=1Length=55	Score = 82.0 bits (201), Expect = 4e-014
mapped-read 34793	F1UMNMG01B6KSD	Length=197	tr|B4N5L0|B4N5L0_DROWI GK12697 OS=Drosophila willistoni GN=GK12697 PE=4 SV=1Length=182	Score = 76.6 bits (187), Expect = 2e-012
mapped-read 34793	F1UMNMG01CG977	Length=189	tr|B4N5L0|B4N5L0_DROWI GK12697 OS=Drosophila willistoni GN=GK12697 PE=4 SV=1Length=182	Score = 76.6 bits (187), Expect = 2e-012
mapped-read 34793	F1UMNMG01AQES1	Length=190	tr|B4N5L0|B4N5L0_DROWI GK12697 OS=Drosophila willistoni GN=GK12697 PE=4 SV=1Length=182	Score = 76.6 bits (187), Expect = 2e-012
mapped-read 34793	F1UMNMG01BWHXV	Length=392	tr|B4N5L0|B4N5L0_DROWI GK12697 OS=Drosophila willistoni GN=GK12697 PE=4 SV=1Length=182	Score = 76.6 bits (187), Expect = 2e-012
mapped-read 34793	F1UMNMG01BVJ78	Length=317	tr|B4N5L0|B4N5L0_DROWI GK12697 OS=Drosophila willistoni GN=GK12697 PE=4 SV=1Length=182	Score = 76.6 bits (187), Expect = 2e-012
mapped-read 34793	F1UMNMG01CAWWG	Length=190	tr|B4N5L0|B4N5L0_DROWI GK12697 OS=Drosophila willistoni GN=GK12697 PE=4 SV=1Length=182	Score = 76.6 bits (187), Expect = 2e-012
mapped-read 34793	F1UMNMG01B4ULM	Length=187	tr|B4N5L0|B4N5L0_DROWI GK12697 OS=Drosophila willistoni GN=GK12697 PE=4 SV=1Length=182	Score = 75.1 bits (183), Expect = 5e-012
mapped-read 34793	F1UMNMG01B8VXH	Length=192	tr|B4N5L0|B4N5L0_DROWI GK12697 OS=Drosophila willistoni GN=GK12697 PE=4 SV=1Length=182	Score = 76.6 bits (187), Expect = 2e-012
mapped-read 34793	F1UMNMG01BPVK1	Length=196	tr|B4N5L0|B4N5L0_DROWI GK12697 OS=Drosophila willistoni GN=GK12697 PE=4 SV=1Length=182	Score = 76.6 bits (187), Expect = 2e-012
mapped-read 34793	F1UMNMG01B2VHI	Length=187	tr|B4N5L0|B4N5L0_DROWI GK12697 OS=Drosophila willistoni GN=GK12697 PE=4 SV=1Length=182	Score = 76.6 bits (187), Expect = 2e-012
mapped-read 34793	F1UMNMG01CC9PM	Length=192	tr|B4N5L0|B4N5L0_DROWI GK12697 OS=Drosophila willistoni GN=GK12697 PE=4 SV=1Length=182	Score = 76.6 bits (187), Expect = 2e-012
mapped-read 34793	F1UMNMG01BDOMS	Length=189	tr|B4N5L0|B4N5L0_DROWI GK12697 OS=Drosophila willistoni GN=GK12697 PE=4 SV=1Length=182	Score = 76.6 bits (187), Expect = 2e-012
mapped-read 34793	F1UMNMG01A9TAM	Length=236	tr|B4N5L0|B4N5L0_DROWI GK12697 OS=Drosophila willistoni GN=GK12697 PE=4 SV=1Length=182	Score = 76.6 bits (187), Expect = 2e-012
mapped-read 34793	F1UMNMG01BB1WJ	Length=189	tr|B4N5L0|B4N5L0_DROWI GK12697 OS=Drosophila willistoni GN=GK12697 PE=4 SV=1Length=182	Score = 76.6 bits (187), Expect = 2e-012
mapped-read 34793	F1UMNMG01CA979	Length=188	tr|B4N5L0|B4N5L0_DROWI GK12697 OS=Drosophila willistoni GN=GK12697 PE=4 SV=1Length=182	Score = 76.6 bits (187), Expect = 2e-012
mapped-read 34793	F1UMNMG01BFGT6	Length=198	tr|Q5BT34|Q5BT34_SCHJA Putative uncharacterized protein OS=Schistosoma japonicum PE=4 SV=1Length=55	Score = 75.9 bits (185), Expect = 3e-012
mapped-read 34793	F1UMNMG01B4P6F	Length=186	tr|B4N5L0|B4N5L0_DROWI GK12697 OS=Drosophila willistoni GN=GK12697 PE=4 SV=1Length=182	Score = 75.1 bits (183), Expect = 5e-012
mapped-read 34793	F1UMNMG01B2LAP	Length=304	tr|B4N5L0|B4N5L0_DROWI GK12697 OS=Drosophila willistoni GN=GK12697 PE=4 SV=1Length=182	Score = 76.6 bits (187), Expect = 2e-012
mapped-read 34793	F1UMNMG01BXOIP	Length=184	tr|B4N5L0|B4N5L0_DROWI GK12697 OS=Drosophila willistoni GN=GK12697 PE=4 SV=1Length=182	Score = 76.6 bits (187), Expect = 2e-012
mapped-read 34793	F1UMNMG01A6LNN	Length=187	tr|B4N5L0|B4N5L0_DROWI GK12697 OS=Drosophila willistoni GN=GK12697 PE=4 SV=1Length=182	Score = 75.1 bits (183), Expect = 5e-012
mapped-read 34793	F1UMNMG01AXX20	Length=186	tr|B4N5L0|B4N5L0_DROWI GK12697 OS=Drosophila willistoni GN=GK12697 PE=4 SV=1Length=182	Score = 77.0 bits (188), Expect = 1e-012
mapped-read 34793	F1UMNMG01BTR0W	Length=238	tr|B4N5L0|B4N5L0_DROWI GK12697 OS=Drosophila willistoni GN=GK12697 PE=4 SV=1Length=182	Score = 77.0 bits (188), Expect = 1e-012
mapped-read 34793	F1UMNMG01CJ5UM	Length=227	tr|B4N5L0|B4N5L0_DROWI GK12697 OS=Drosophila willistoni GN=GK12697 PE=4 SV=1Length=182	Score = 76.6 bits (187), Expect = 2e-012
mapped-read 34793	F1UMNMG01BY224	Length=196	tr|B4N5L0|B4N5L0_DROWI GK12697 OS=Drosophila willistoni GN=GK12697 PE=4 SV=1Length=182	Score = 76.6 bits (187), Expect = 2e-012
mapped-read 34793	F1UMNMG01A5RUG	Length=190	tr|B4N5L0|B4N5L0_DROWI GK12697 OS=Drosophila willistoni GN=GK12697 PE=4 SV=1Length=182	Score = 76.6 bits (187), Expect = 2e-012
mapped-read 34793	F1UMNMG01BD0J0	Length=191	tr|B4N5L0|B4N5L0_DROWI GK12697 OS=Drosophila willistoni GN=GK12697 PE=4 SV=1Length=182	Score = 76.6 bits (187), Expect = 2e-012
mapped-read 34793	F1UMNMG01BUSBU	Length=188	tr|B4N5L0|B4N5L0_DROWI GK12697 OS=Drosophila willistoni GN=GK12697 PE=4 SV=1Length=182	Score = 77.0 bits (188), Expect = 1e-012
mapped-read 34793	F1UMNMG01CGGDD	Length=187	tr|B4N5L0|B4N5L0_DROWI GK12697 OS=Drosophila willistoni GN=GK12697 PE=4 SV=1Length=182	Score = 77.0 bits (188), Expect = 1e-012
mapped-read 34793	F1UMNMG01B1BPC	Length=172	tr|B4N5L0|B4N5L0_DROWI GK12697 OS=Drosophila willistoni GN=GK12697 PE=4 SV=1Length=182	Score = 74.3 bits (181), Expect = 9e-012
mapped-read 34793	F1UMNMG01BJ8XO	Length=189	tr|B4N5L0|B4N5L0_DROWI GK12697 OS=Drosophila willistoni GN=GK12697 PE=4 SV=1Length=182	Score = 76.6 bits (187), Expect = 2e-012
mapped-read 34793	F1UMNMG01AXFPW	Length=188	tr|B4N5L0|B4N5L0_DROWI GK12697 OS=Drosophila willistoni GN=GK12697 PE=4 SV=1Length=182	Score = 77.0 bits (188), Expect = 1e-012
mapped-read 34793	F1UMNMG01BDTOL	Length=189	tr|B4N5L0|B4N5L0_DROWI GK12697 OS=Drosophila willistoni GN=GK12697 PE=4 SV=1Length=182	Score = 76.6 bits (187), Expect = 2e-012
mapped-read 34793	F1UMNMG01ARWOZ	Length=243	tr|B4N5L0|B4N5L0_DROWI GK12697 OS=Drosophila willistoni GN=GK12697 PE=4 SV=1Length=182	Score = 75.1 bits (183), Expect = 5e-012
mapped-read 34793	F1UMNMG01CEOVT	Length=193	tr|Q5BT34|Q5BT34_SCHJA Putative uncharacterized protein OS=Schistosoma japonicum PE=4 SV=1Length=55	Score = 75.9 bits (185), Expect = 3e-012
mapped-read 34793	F1UMNMG01AMU9Z	Length=187	tr|B4N5L0|B4N5L0_DROWI GK12697 OS=Drosophila willistoni GN=GK12697 PE=4 SV=1Length=182	Score = 77.0 bits (188), Expect = 1e-012
mapped-read 34793	F1UMNMG01CJKD6	Length=377	tr|B4N5L0|B4N5L0_DROWI GK12697 OS=Drosophila willistoni GN=GK12697 PE=4 SV=1Length=182	Score = 76.3 bits (186), Expect = 2e-012
mapped-read 34793	F1UMNMG01AUAEF	Length=188	tr|B4N5L0|B4N5L0_DROWI GK12697 OS=Drosophila willistoni GN=GK12697 PE=4 SV=1Length=182	Score = 76.6 bits (187), Expect = 2e-012
mapped-read 34793	F1UMNMG01AV0PE	Length=185	tr|B4N5L0|B4N5L0_DROWI GK12697 OS=Drosophila willistoni GN=GK12697 PE=4 SV=1Length=182	Score = 76.6 bits (187), Expect = 2e-012
mapped-read 34793	F1UMNMG01CGTRX	Length=187	tr|B4N5L0|B4N5L0_DROWI GK12697 OS=Drosophila willistoni GN=GK12697 PE=4 SV=1Length=182	Score = 77.0 bits (188), Expect = 1e-012
mapped-read 34793	F1UMNMG01B1IGG	Length=225	tr|Q5BT34|Q5BT34_SCHJA Putative uncharacterized protein OS=Schistosoma japonicum PE=4 SV=1Length=55	Score = 75.9 bits (185), Expect = 3e-012
mapped-read 34793	F1UMNMG01BHLKH	Length=186	tr|B4N5L0|B4N5L0_DROWI GK12697 OS=Drosophila willistoni GN=GK12697 PE=4 SV=1Length=182	Score = 76.6 bits (187), Expect = 2e-012
mapped-read 34793	F1UMNMG01ARCKG	Length=227	tr|B4N5L0|B4N5L0_DROWI GK12697 OS=Drosophila willistoni GN=GK12697 PE=4 SV=1Length=182	Score = 76.6 bits (187), Expect = 2e-012
mapped-read 34793	F1UMNMG01A78DS	Length=186	No Hit
mapped-read 34793	F1UMNMG01CGCVV	Length=244	tr|Q5BT34|Q5BT34_SCHJA Putative uncharacterized protein OS=Schistosoma japonicum PE=4 SV=1Length=55	Score = 87.8 bits (216), Expect = 7e-016
mapped-read 34793	F1UMNMG01BG2ZF	Length=271	tr|B4N5L0|B4N5L0_DROWI GK12697 OS=Drosophila willistoni GN=GK12697 PE=4 SV=1Length=182	Score = 76.6 bits (187), Expect = 2e-012
mapped-read 34793	F1UMNMG01BU8R2	Length=200	tr|B4N5L0|B4N5L0_DROWI GK12697 OS=Drosophila willistoni GN=GK12697 PE=4 SV=1Length=182	Score = 76.6 bits (187), Expect = 2e-012
mapped-read 34793	F1UMNMG01B9I99	Length=184	tr|B4N5L0|B4N5L0_DROWI GK12697 OS=Drosophila willistoni GN=GK12697 PE=4 SV=1Length=182	Score = 76.6 bits (187), Expect = 2e-012
mapped-read 34793	F1UMNMG01CJWUF	Length=405	No Hit
mapped-read 34793	F1UMNMG01BYWDX	Length=188	tr|B4N5L0|B4N5L0_DROWI GK12697 OS=Drosophila willistoni GN=GK12697 PE=4 SV=1Length=182	Score = 77.8 bits (190), Expect = 8e-013
mapped-read 34793	F1UMNMG01AOMZZ	Length=190	tr|B4N5L0|B4N5L0_DROWI GK12697 OS=Drosophila willistoni GN=GK12697 PE=4 SV=1Length=182	Score = 76.6 bits (187), Expect = 2e-012
mapped-read 34793	F1UMNMG01BUNJX	Length=182	tr|B4N5L0|B4N5L0_DROWI GK12697 OS=Drosophila willistoni GN=GK12697 PE=4 SV=1Length=182	Score = 74.3 bits (181), Expect = 9e-012
mapped-read 34793	F1UMNMG01AYGGW	Length=200	tr|B4N5L0|B4N5L0_DROWI GK12697 OS=Drosophila willistoni GN=GK12697 PE=4 SV=1Length=182	Score = 71.2 bits (173), Expect = 7e-011
mapped-read 34793	F1UMNMG01ARVQS	Length=188	tr|B4N5L0|B4N5L0_DROWI GK12697 OS=Drosophila willistoni GN=GK12697 PE=4 SV=1Length=182	Score = 77.0 bits (188), Expect = 1e-012
mapped-read 34793	F1UMNMG01AP8H7	Length=190	tr|B4N5L0|B4N5L0_DROWI GK12697 OS=Drosophila willistoni GN=GK12697 PE=4 SV=1Length=182	Score = 76.6 bits (187), Expect = 2e-012
mapped-read 34793	F1UMNMG01AXQR5	Length=183	tr|B4N5L0|B4N5L0_DROWI GK12697 OS=Drosophila willistoni GN=GK12697 PE=4 SV=1Length=182	Score = 76.6 bits (187), Expect = 2e-012
mapped-read 34793	F1UMNMG01CCK0W	Length=192	tr|B4N5L0|B4N5L0_DROWI GK12697 OS=Drosophila willistoni GN=GK12697 PE=4 SV=1Length=182	Score = 76.6 bits (187), Expect = 2e-012
mapped-read 34793	F1UMNMG01BDES3	Length=184	tr|B4N5L0|B4N5L0_DROWI GK12697 OS=Drosophila willistoni GN=GK12697 PE=4 SV=1Length=182	Score = 76.6 bits (187), Expect = 2e-012
mapped-read 34793	F1UMNMG01BZIGY	Length=184	No Hit
mapped-read 34793	F1UMNMG01A9505	Length=259	tr|B4N5L0|B4N5L0_DROWI GK12697 OS=Drosophila willistoni GN=GK12697 PE=4 SV=1Length=182	Score = 76.6 bits (187), Expect = 2e-012
mapped-read 34793	F1UMNMG01BQ9BY	Length=219	tr|B4N5L0|B4N5L0_DROWI GK12697 OS=Drosophila willistoni GN=GK12697 PE=4 SV=1Length=182	Score = 76.6 bits (187), Expect = 2e-012
mapped-read 34793	F1UMNMG01ARFUD	Length=187	tr|B4N5L0|B4N5L0_DROWI GK12697 OS=Drosophila willistoni GN=GK12697 PE=4 SV=1Length=182	Score = 75.1 bits (183), Expect = 5e-012
mapped-read 34793	F1UMNMG01ASG7E	Length=754	tr|B4N5L0|B4N5L0_DROWI GK12697 OS=Drosophila willistoni GN=GK12697 PE=4 SV=1Length=182	Score = 76.6 bits (187), Expect = 5e-012
mapped-read 34793	F1UMNMG01B4YSF	Length=470	tr|B4N5L0|B4N5L0_DROWI GK12697 OS=Drosophila willistoni GN=GK12697 PE=4 SV=1Length=182	Score = 76.6 bits (187), Expect = 2e-012
mapped-read 34793	F1UMNMG01AT0OM	Length=329	tr|B4N5L0|B4N5L0_DROWI GK12697 OS=Drosophila willistoni GN=GK12697 PE=4 SV=1Length=182	Score = 77.4 bits (189), Expect = 1e-012
mapped-read 34793	F1UMNMG01BD0GH	Length=188	tr|B4N5L0|B4N5L0_DROWI GK12697 OS=Drosophila willistoni GN=GK12697 PE=4 SV=1Length=182	Score = 76.6 bits (187), Expect = 2e-012
mapped-read 34793	F1UMNMG01BF6CM	Length=188	tr|B4N5L0|B4N5L0_DROWI GK12697 OS=Drosophila willistoni GN=GK12697 PE=4 SV=1Length=182	Score = 76.6 bits (187), Expect = 2e-012
mapped-read 34793	F1UMNMG01BZ00G	Length=189	tr|B4N5L0|B4N5L0_DROWI GK12697 OS=Drosophila willistoni GN=GK12697 PE=4 SV=1Length=182	Score = 76.6 bits (187), Expect = 2e-012
mapped-read 34793	F1UMNMG01BND0T	Length=185	tr|B4N5L0|B4N5L0_DROWI GK12697 OS=Drosophila willistoni GN=GK12697 PE=4 SV=1Length=182	Score = 76.6 bits (187), Expect = 2e-012
mapped-read 34793	F1UMNMG01BVNIH	Length=188	tr|B4N5L0|B4N5L0_DROWI GK12697 OS=Drosophila willistoni GN=GK12697 PE=4 SV=1Length=182	Score = 76.6 bits (187), Expect = 2e-012
mapped-read 34793	F1UMNMG01BBCSE	Length=186	tr|B4N5L0|B4N5L0_DROWI GK12697 OS=Drosophila willistoni GN=GK12697 PE=4 SV=1Length=182	Score = 76.6 bits (187), Expect = 2e-012
mapped-read 34793	F1UMNMG01AOQ4Y	Length=245	tr|Q5BT34|Q5BT34_SCHJA Putative uncharacterized protein OS=Schistosoma japonicum PE=4 SV=1Length=55	Score = 87.8 bits (216), Expect = 7e-016
mapped-read 34793	F1UMNMG01BPW5Z	Length=196	tr|B4N5L0|B4N5L0_DROWI GK12697 OS=Drosophila willistoni GN=GK12697 PE=4 SV=1Length=182	Score = 76.6 bits (187), Expect = 2e-012
mapped-read 34793	F1UMNMG01A4V83	Length=186	tr|B4N5L0|B4N5L0_DROWI GK12697 OS=Drosophila willistoni GN=GK12697 PE=4 SV=1Length=182	Score = 76.6 bits (187), Expect = 2e-012
mapped-read 34793	F1UMNMG01B6W9F	Length=170	tr|B4N5L0|B4N5L0_DROWI GK12697 OS=Drosophila willistoni GN=GK12697 PE=4 SV=1Length=182	Score = 74.3 bits (181), Expect = 9e-012
mapped-read 34793	F1UMNMG01B69QI	Length=189	tr|B4N5L0|B4N5L0_DROWI GK12697 OS=Drosophila willistoni GN=GK12697 PE=4 SV=1Length=182	Score = 76.6 bits (187), Expect = 2e-012
mapped-read 34793	F1UMNMG01B7GXO	Length=190	tr|B4N5L0|B4N5L0_DROWI GK12697 OS=Drosophila willistoni GN=GK12697 PE=4 SV=1Length=182	Score = 76.6 bits (187), Expect = 2e-012
mapped-read 34793	F1UMNMG01BTM9S	Length=226	tr|B4N5L0|B4N5L0_DROWI GK12697 OS=Drosophila willistoni GN=GK12697 PE=4 SV=1Length=182	Score = 76.6 bits (187), Expect = 2e-012
mapped-read 34793	F1UMNMG01AU1OZ	Length=188	tr|B4N5L0|B4N5L0_DROWI GK12697 OS=Drosophila willistoni GN=GK12697 PE=4 SV=1Length=182	Score = 77.0 bits (188), Expect = 1e-012
mapped-read 34793	F1UMNMG01BJ4HR	Length=399	No Hit
mapped-read 34793	F1UMNMG01A5HQX	Length=188	tr|B4N5L0|B4N5L0_DROWI GK12697 OS=Drosophila willistoni GN=GK12697 PE=4 SV=1Length=182	Score = 77.0 bits (188), Expect = 1e-012
mapped-read 34793	F1UMNMG01AZ2X4	Length=190	tr|B4N5L0|B4N5L0_DROWI GK12697 OS=Drosophila willistoni GN=GK12697 PE=4 SV=1Length=182	Score = 76.6 bits (187), Expect = 2e-012
mapped-read 34793	F1UMNMG01A3PXY	Length=185	tr|B4N5L0|B4N5L0_DROWI GK12697 OS=Drosophila willistoni GN=GK12697 PE=4 SV=1Length=182	Score = 76.6 bits (187), Expect = 2e-012
mapped-read 34793	F1UMNMG01ARADF	Length=188	tr|B4N5L0|B4N5L0_DROWI GK12697 OS=Drosophila willistoni GN=GK12697 PE=4 SV=1Length=182	Score = 77.0 bits (188), Expect = 1e-012
mapped-read 34793	F1UMNMG01BRCOF	Length=185	tr|B4N5L0|B4N5L0_DROWI GK12697 OS=Drosophila willistoni GN=GK12697 PE=4 SV=1Length=182	Score = 76.6 bits (187), Expect = 2e-012
mapped-read 34793	F1UMNMG01BG565	Length=189	tr|B4N5L0|B4N5L0_DROWI GK12697 OS=Drosophila willistoni GN=GK12697 PE=4 SV=1Length=182	Score = 76.6 bits (187), Expect = 2e-012
mapped-read 34793	F1UMNMG01BG6EJ	Length=212	tr|B4N5L0|B4N5L0_DROWI GK12697 OS=Drosophila willistoni GN=GK12697 PE=4 SV=1Length=182	Score = 76.6 bits (187), Expect = 2e-012
mapped-read 34793	F1UMNMG01A7YBC	Length=233	tr|Q5BT34|Q5BT34_SCHJA Putative uncharacterized protein OS=Schistosoma japonicum PE=4 SV=1Length=55	Score = 99.0 bits (245), Expect = 3e-019
mapped-read 34793	F1UMNMG01ARB3V	Length=249	tr|B4N5L0|B4N5L0_DROWI GK12697 OS=Drosophila willistoni GN=GK12697 PE=4 SV=1Length=182	Score = 76.6 bits (187), Expect = 2e-012
mapped-read 34793	F1UMNMG01A067E	Length=191	tr|B4N5L0|B4N5L0_DROWI GK12697 OS=Drosophila willistoni GN=GK12697 PE=4 SV=1Length=182	Score = 76.6 bits (187), Expect = 2e-012
mapped-read 34793	F1UMNMG01ASULW	Length=190	tr|B4N5L0|B4N5L0_DROWI GK12697 OS=Drosophila willistoni GN=GK12697 PE=4 SV=1Length=182	Score = 77.0 bits (188), Expect = 1e-012
mapped-read 34793	F1UMNMG01BGDO9	Length=190	tr|B4N5L0|B4N5L0_DROWI GK12697 OS=Drosophila willistoni GN=GK12697 PE=4 SV=1Length=182	Score = 76.6 bits (187), Expect = 2e-012
mapped-read 34793	F1UMNMG01BJFYH	Length=320	tr|B4N5L0|B4N5L0_DROWI GK12697 OS=Drosophila willistoni GN=GK12697 PE=4 SV=1Length=182	Score = 77.0 bits (188), Expect = 1e-012
mapped-read 34793	F1UMNMG01B8FP9	Length=191	tr|B4N5L0|B4N5L0_DROWI GK12697 OS=Drosophila willistoni GN=GK12697 PE=4 SV=1Length=182	Score = 76.6 bits (187), Expect = 2e-012
mapped-read 4383	F1UMNMG01B21QK	Length=532	tr|F4S2J1|F4S2J1_MELLP Putative uncharacterized protein OS=Melampsora larici-populina (strain 98AG31 / pathotype 3-4-7) GN=MELLADRAFT_92705 PE=4 SV=1Length=113	Score = 90.1 bits (222), Expect(2) = 1e-022
mapped-read 4383	F1UMNMG01BL9K0	Length=432	No Hit
mapped-read 4383	F1UMNMG01BH7KA	Length=365	tr|B4N5L0|B4N5L0_DROWI GK12697 (monooxygenase activity) OS=Drosophila willistoni GN=GK12697 PE=4 SV=1Length=182	Score = 76.3 bits (186), Expect = 2e-012
mapped-read 4383	F1UMNMG01CBVD6	Length=525	tr|F4S2J1|F4S2J1_MELLP Putative uncharacterized protein (RRNA intron-encoded homing endonuclease) OS=Melampsora larici-populina (strain 98AG31 / pathotype 3-4-7) GN=MELLADRAFT_92705 PE=4 SV=1Length=113	Score = 73.9 bits (180), Expect(2) = 4e-015
mapped-read 4383	F1UMNMG01B94Y9	Length=369	tr|B4N5L0|B4N5L0_DROWI GK12697 (monooxygenase activity) OS=Drosophila willistoni GN=GK12697 PE=4 SV=1Length=182	Score = 67.0 bits (162), Expect = 1e-009
mapped-read 4383	F1UMNMG01CFAYJ	Length=558	tr|G7K0D2|G7K0D2_MEDTR Putative uncharacterized protein OS=Medicago truncatula GN=MTR_5g051000 PE=4 SV=1Length=1735	Score = 70.5 bits (171), Expect = 2e-010
mapped-read 4383	F1UMNMG01CGSF7	Length=536	tr|F4RVJ8|F4RVJ8_MELLP Putative uncharacterized protein OS=Melampsora larici-populina (strain 98AG31 / pathotype 3-4-7) GN=MELLADRAFT_90053 PE=4 SV=1Length=160	Score = 82.0 bits (201), Expect(2) = 2e-020
mapped-read 4383	F1UMNMG01A1KB1	Length=531	tr|B4N5L0|B4N5L0_DROWI GK12697 (monooxygenase activity) OS=Drosophila willistoni GN=GK12697 PE=4 SV=1Length=182	Score = 76.6 bits (187), Expect = 2e-012
mapped-read 4383	F1UMNMG01B1GLR	Length=576	tr|B4N5L0|B4N5L0_DROWI GK12697 (monooxygenase activity) OS=Drosophila willistoni GN=GK12697 PE=4 SV=1Length=182	Score = 58.5 bits (140), Expect = 7e-007
mapped-read 4383	F1UMNMG01BD7OS	Length=364	tr|B4N5L0|B4N5L0_DROWI GK12697 (monooxygenase activity) OS=Drosophila willistoni GN=GK12697 PE=4 SV=1Length=182	Score = 76.3 bits (186), Expect = 2e-012
mapped-read 4383	F1UMNMG01CDTIB	Length=353	No Hit
mapped-read 4383	F1UMNMG01BM57F	Length=507	tr|B4N5L0|B4N5L0_DROWI GK12697 (monooxygenase activity) OS=Drosophila willistoni GN=GK12697 PE=4 SV=1Length=182	Score = 76.6 bits (187), Expect = 2e-012
mapped-read 4383	F1UMNMG01ARWHD	Length=336	tr|B4N5L0|B4N5L0_DROWI GK12697 (monooxygenase activity) OS=Drosophila willistoni GN=GK12697 PE=4 SV=1Length=182	Score = 76.6 bits (187), Expect = 2e-012
mapped-read 4383	F1UMNMG01BJGU7	Length=518	tr|Q5BT34|Q5BT34_SCHJA Putative uncharacterized protein OS=Schistosoma japonicum PE=4 SV=1Length=55	Score = 109 bits (272), Expect = 2e-022
mapped-read 4383	F1UMNMG01CMVR0	Length=534	tr|B4N5L0|B4N5L0_DROWI GK12697 (monooxygenase activity) OS=Drosophila willistoni GN=GK12697 PE=4 SV=1Length=182	Score = 76.6 bits (187), Expect = 2e-012
mapped-read 4383	F1UMNMG01BEN8Y	Length=365	tr|B4N5L0|B4N5L0_DROWI GK12697 (monooxygenase activity) OS=Drosophila willistoni GN=GK12697 PE=4 SV=1Length=182	Score = 76.3 bits (186), Expect = 2e-012
mapped-read 4383	F1UMNMG01BF8WT	Length=531	tr|F4RVJ8|F4RVJ8_MELLP Putative uncharacterized protein OS=Melampsora larici-populina (strain 98AG31 / pathotype 3-4-7) GN=MELLADRAFT_90053 PE=4 SV=1Length=160	Score = 82.0 bits (201), Expect(2) = 2e-019
mapped-read 4383	F1UMNMG01BO8RT	Length=524	tr|F4S2J1|F4S2J1_MELLP Putative uncharacterized protein OS=Melampsora larici-populina (strain 98AG31 / pathotype 3-4-7) GN=MELLADRAFT_92705 PE=4 SV=1Length=113	Score = 103 bits (257), Expect = 1e-020
mapped-read 4383	F1UMNMG01CJD8V	Length=534	tr|B4N5L0|B4N5L0_DROWI GK12697 OS=Drosophila willistoni GN=GK12697 PE=4 SV=1Length=182	Score = 76.6 bits (187), Expect = 2e-012
mapped-read 4383	F1UMNMG01BHBR5	Length=524	tr|F4S2J1|F4S2J1_MELLP Putative uncharacterized protein OS=Melampsora larici-populina (strain 98AG31 / pathotype 3-4-7) GN=MELLADRAFT_92705 PE=4 SV=1Length=113	Score = 108 bits (271), Expect(2) = 2e-028
mapped-read 4383	F1UMNMG01COFB0	Length=440	No Hit
mapped-read 4383	F1UMNMG01BSLC4	Length=520	tr|G7E0M2|G7E0M2_MIXOS Putative uncharacterized protein Mo03049 OS=Mixia osmundae (strain CBS 9802 / IAM 14324 / JCM 22182 / KY 12970) GN=Mo03049 PE=4 SV=1Length=352	Score = 69.7 bits (169), Expect(2) = 1e-022
mapped-read 4383	F1UMNMG01ARJDD	Length=536	tr|Q5BT34|Q5BT34_SCHJA Putative uncharacterized protein OS=Schistosoma japonicum PE=4 SV=1Length=55	Score = 104 bits (259), Expect = 9e-021
mapped-read 4383	F1UMNMG01CN0KT	Length=364	tr|B4N5L0|B4N5L0_DROWI GK12697 (monooxygenase activity) OS=Drosophila willistoni GN=GK12697 PE=4 SV=1Length=182	Score = 76.6 bits (187), Expect = 2e-012
mapped-read 4383	F1UMNMG01ANIM0	Length=543	tr|F4SCC1|F4SCC1_MELLP Putative uncharacterized protein OS=Melampsora larici-populina (strain 98AG31 / pathotype 3-4-7) GN=MELLADRAFT_84525 PE=4 SV=1Length=347	Score = 58.9 bits (141), Expect(2) = 8e-014
mapped-read 4383	F1UMNMG01BKR7Y	Length=492	tr|F4SCC1|F4SCC1_MELLP Putative uncharacterized protein OS=Melampsora larici-populina (strain 98AG31 / pathotype 3-4-7) GN=MELLADRAFT_84525 PE=4 SV=1Length=347	Score = 98.6 bits (244), Expect = 4e-019
mapped-read 4383	F1UMNMG01BI8U0	Length=326	tr|B4N5L0|B4N5L0_DROWI GK12697 (monooxygenase activity) OS=Drosophila willistoni GN=GK12697 PE=4 SV=1Length=182	Score = 76.6 bits (187), Expect = 2e-012
mapped-read 4383	F1UMNMG01CBFOU	Length=353	No Hit
mapped-read 4383	F1UMNMG01A4EUZ	Length=490	tr|F4RVJ8|F4RVJ8_MELLP Putative uncharacterized protein OS=Melampsora larici-populina (strain 98AG31 / pathotype 3-4-7) GN=MELLADRAFT_90053 PE=4 SV=1Length=160	Score = 41.6 bits (96), Expect(2) = 2e-007
mapped-read 4383	F1UMNMG01BIBPY	Length=364	tr|B4N5L0|B4N5L0_DROWI GK12697 (monooxygenase activity) OS=Drosophila willistoni GN=GK12697 PE=4 SV=1Length=182	Score = 77.4 bits (189), Expect = 1e-012
mapped-read 4383	F1UMNMG01CLI70	Length=332	No Hit
mapped-read 4383	F1UMNMG01AVAC7	Length=359	tr|A8NFC5|A8NFC5_BRUMA rRNA promoter binding protein, putative (Fragment) OS=Brugia malayi GN=Bm1_01405 PE=4 SV=1Length=81	Score = 54.3 bits (129), Expect(2) = 8e-008
mapped-read 4383	F1UMNMG01CJWF9	Length=359	tr|B4N5L0|B4N5L0_DROWI GK12697 (monooxygenase activity) OS=Drosophila willistoni GN=GK12697 PE=4 SV=1Length=182	Score = 73.9 bits (180), Expect = 1e-011
mapped-read 4383	F1UMNMG01BSJUU	Length=385	tr|B4N5L0|B4N5L0_DROWI GK12697 (monooxygenase activity) OS=Drosophila willistoni GN=GK12697 PE=4 SV=1Length=182	Score = 76.6 bits (187), Expect = 2e-012
mapped-read 4383	F1UMNMG01BGPQG	Length=536	tr|G7E0M2|G7E0M2_MIXOS Putative uncharacterized protein Mo03049 OS=Mixia osmundae (strain CBS 9802 / IAM 14324 / JCM 22182 / KY 12970) GN=Mo03049 PE=4 SV=1Length=352	Score = 70.5 bits (171), Expect(2) = 3e-025
mapped-read 4383	F1UMNMG01CG2Y2	Length=362	tr|B4N5L0|B4N5L0_DROWI GK12697 (monooxygenase activity) OS=Drosophila willistoni GN=GK12697 PE=4 SV=1Length=182	Score = 76.6 bits (187), Expect = 2e-012
mapped-read 4383	F1UMNMG01BEC88	Length=432	No Hit
mapped-read 4383	F1UMNMG01ASHCQ	Length=594	tr|B4N5L0|B4N5L0_DROWI GK12697 (monooxygenase activity) OS=Drosophila willistoni GN=GK12697 PE=4 SV=1Length=182	Score = 76.6 bits (187), Expect = 3e-012
mapped-read 4383	F1UMNMG01BIZW4	Length=354	tr|B4N5L0|B4N5L0_DROWI GK12697 (monooxygenase activity) OS=Drosophila willistoni GN=GK12697 PE=4 SV=1Length=182	Score = 76.6 bits (187), Expect = 2e-012
mapped-read 4383	F1UMNMG01BVN0N	Length=508	tr|Q5BT34|Q5BT34_SCHJA Putative uncharacterized protein OS=Schistosoma japonicum PE=4 SV=1Length=55	Score = 109 bits (272), Expect = 2e-022
mapped-read 4383	F1UMNMG01CJCI3	Length=358	tr|B4N5L0|B4N5L0_DROWI GK12697 (monooxygenase activity) OS=Drosophila willistoni GN=GK12697 PE=4 SV=1Length=182	Score = 76.6 bits (187), Expect = 2e-012
mapped-read 4383	F1UMNMG01CLEUD	Length=411	No Hit
mapped-read 4383	F1UMNMG01A71DR	Length=378	tr|B4N5L0|B4N5L0_DROWI GK12697 (monooxygenase activity) OS=Drosophila willistoni GN=GK12697 PE=4 SV=1Length=182	Score = 76.6 bits (187), Expect = 2e-012
mapped-read 4383	F1UMNMG01CMI8M	Length=355	tr|B4N5L0|B4N5L0_DROWI GK12697 (monooxygenase activity) OS=Drosophila willistoni GN=GK12697 PE=4 SV=1Length=182	Score = 76.6 bits (187), Expect = 2e-012
mapped-read 4383	F1UMNMG01CHW4G	Length=353	No Hit
mapped-read 4383	F1UMNMG01BGMPS	Length=367	tr|B4N5L0|B4N5L0_DROWI GK12697 (monooxygenase activity) OS=Drosophila willistoni GN=GK12697 PE=4 SV=1Length=182	Score = 76.6 bits (187), Expect = 2e-012
mapped-read 4383	F1UMNMG01B1PRR	Length=369	tr|B4N5L0|B4N5L0_DROWI GK12697 (monooxygenase activity) OS=Drosophila willistoni GN=GK12697 PE=4 SV=1Length=182	Score = 76.6 bits (187), Expect = 2e-012
mapped-read 4383	F1UMNMG01A5GIJ	Length=360	tr|B4N5L0|B4N5L0_DROWI GK12697 (monooxygenase activity) OS=Drosophila willistoni GN=GK12697 PE=4 SV=1Length=182	Score = 76.6 bits (187), Expect = 2e-012
mapped-read 4383	F1UMNMG01A8HN2	Length=362	tr|B4N5L0|B4N5L0_DROWI GK12697 (monooxygenase activity) OS=Drosophila willistoni GN=GK12697 PE=4 SV=1Length=182	Score = 76.6 bits (187), Expect = 2e-012
mapped-read 4383	F1UMNMG01AW3GV	Length=377	tr|B4N5L0|B4N5L0_DROWI GK12697 (monooxygenase activity) OS=Drosophila willistoni GN=GK12697 PE=4 SV=1Length=182	Score = 74.7 bits (182), Expect = 7e-012
mapped-read 4383	F1UMNMG01AUXJ0	Length=422	No Hit
mapped-read 4383	F1UMNMG01A30HK	Length=363	tr|B4N5L0|B4N5L0_DROWI GK12697 (monooxygenase activity) OS=Drosophila willistoni GN=GK12697 PE=4 SV=1Length=182	Score = 77.0 bits (188), Expect = 1e-012
mapped-read 4383	F1UMNMG01CB485	Length=366	tr|B4N5L0|B4N5L0_DROWI GK12697 (monooxygenase activity) OS=Drosophila willistoni GN=GK12697 PE=4 SV=1Length=182	Score = 76.6 bits (187), Expect = 2e-012
mapped-read 4383	F1UMNMG01BDLB9	Length=376	tr|B4N5L0|B4N5L0_DROWI GK12697 (monooxygenase activity) OS=Drosophila willistoni GN=GK12697 PE=4 SV=1Length=182	Score = 76.6 bits (187), Expect = 2e-012
mapped-read 4383	F1UMNMG01A8PP8	Length=373	No Hit
mapped-read 4383	F1UMNMG01BT82M	Length=359	tr|B4N5L0|B4N5L0_DROWI GK12697 (monooxygenase activity) OS=Drosophila willistoni GN=GK12697 PE=4 SV=1Length=182	Score = 76.6 bits (187), Expect = 2e-012
mapped-read 4383	F1UMNMG01BWAMY	Length=393	tr|B4N5L0|B4N5L0_DROWI GK12697 (monooxygenase activity) OS=Drosophila willistoni GN=GK12697 PE=4 SV=1Length=182	Score = 76.6 bits (187), Expect = 2e-012
mapped-read 4383	F1UMNMG01BL3O7	Length=371	tr|B4N5L0|B4N5L0_DROWI GK12697 (monooxygenase activity) OS=Drosophila willistoni GN=GK12697 PE=4 SV=1Length=182	Score = 76.6 bits (187), Expect = 2e-012
mapped-read 4383	F1UMNMG01AQQV5	Length=363	tr|B4N5L0|B4N5L0_DROWI GK12697 (monooxygenase activity) OS=Drosophila willistoni GN=GK12697 PE=4 SV=1Length=182	Score = 76.6 bits (187), Expect = 2e-012
mapped-read 4383	F1UMNMG01A0AR5	Length=402	tr|B4N5L0|B4N5L0_DROWI GK12697 (monooxygenase activity) OS=Drosophila willistoni GN=GK12697 PE=4 SV=1Length=182	Score = 45.8 bits (107), Expect(2) = 1e-008
mapped-read 4383	F1UMNMG01ASSML	Length=373	tr|B4N5L0|B4N5L0_DROWI GK12697 (monooxygenase activity) OS=Drosophila willistoni GN=GK12697 PE=4 SV=1Length=182	Score = 71.6 bits (174), Expect = 6e-011
mapped-read 30589	F1UMNMG01BAU83	Length=708	No Hit
mapped-read 30589	F1UMNMG01ATYOO	Length=528	tr|Q5BT34|Q5BT34_SCHJA Putative uncharacterized protein OS=Schistosoma japonicum PE=4 SV=1Length=55	Score = 95.5 bits (236), Expect = 4e-018
mapped-read 30589	F1UMNMG01CB4GO	Length=443	tr|B4N5L0|B4N5L0_DROWI GK12697 (monooxygenase activity) OS=Drosophila willistoni GN=GK12697 PE=4 SV=1Length=182	Score = 73.2 bits (178), Expect = 2e-011
mapped-read 30589	F1UMNMG01BJ6VU	Length=467	tr|G7K0E5|G7K0E5_MEDTR Putative uncharacterized protein OS=Medicago truncatula GN=MTR_5g051150 PE=4 SV=1Length=2133	Score = 58.5 bits (140), Expect = 5e-007
mapped-read 30589	F1UMNMG01BXYZM	Length=528	tr|G7E0M2|G7E0M2_MIXOS Putative uncharacterized protein Mo03049 OS=Mixia osmundae (strain CBS 9802 / IAM 14324 / JCM 22182 / KY 12970) GN=Mo03049 PE=4 SV=1Length=352	Score = 138 bits (347), Expect = 5e-031
mapped-read 30589	F1UMNMG01BA7ZY	Length=534	tr|Q5BT34|Q5BT34_SCHJA Putative uncharacterized protein OS=Schistosoma japonicum PE=4 SV=1Length=55	Score = 109 bits (272), Expect = 3e-022
mapped-read 30589	F1UMNMG01A0AZV	Length=341	No Hit
mapped-read 30589	F1UMNMG01CMZF9	Length=555	tr|B4N5L0|B4N5L0_DROWI GK12697 (monooxygenase activity) OS=Drosophila willistoni GN=GK12697 PE=4 SV=1Length=182	Score = 73.2 bits (178), Expect = 2e-011
mapped-read 30589	F1UMNMG01A4VY2	Length=343	tr|B4N5L0|B4N5L0_DROWI GK12697 (monooxygenase activity) OS=Drosophila willistoni GN=GK12697 PE=4 SV=1Length=182	Score = 75.5 bits (184), Expect = 4e-012
mapped-read 30589	F1UMNMG01CGXN9	Length=426	tr|B4N5L0|B4N5L0_DROWI GK12697 (monooxygenase activity) OS=Drosophila willistoni GN=GK12697 PE=4 SV=1Length=182	Score = 74.3 bits (181), Expect = 8e-012
mapped-read 30589	F1UMNMG01B70ON	Length=523	tr|E9HZ40|E9HZ40_DAPPU Putative uncharacterized protein OS=Daphnia pulex GN=DAPPUDRAFT_119636 PE=4 SV=1Length=130	Score = 77.8 bits (190), Expect = 8e-013
mapped-read 30589	F1UMNMG01BEBR3	Length=394	tr|B4N5L0|B4N5L0_DROWI GK12697 (monooxygenase activity) OS=Drosophila willistoni GN=GK12697 PE=4 SV=1Length=182	Score = 79.7 bits (195), Expect = 2e-013
mapped-read 30589	F1UMNMG01B9IHU	Length=348	tr|B4N5L0|B4N5L0_DROWI GK12697 (monooxygenase activity) OS=Drosophila willistoni GN=GK12697 PE=4 SV=1Length=182	Score = 73.2 bits (178), Expect = 2e-011
mapped-read 30589	F1UMNMG01CL9OS	Length=364	tr|B4N5L0|B4N5L0_DROWI GK12697 (monooxygenase activity) OS=Drosophila willistoni GN=GK12697 PE=4 SV=1Length=182	Score = 74.3 bits (181), Expect = 9e-012
mapped-read 30589	F1UMNMG01BL0H5	Length=351	No Hit
mapped-read 30589	F1UMNMG01BQ6KF	Length=365	tr|B4N5L0|B4N5L0_DROWI GK12697 (monooxygenase activity) OS=Drosophila willistoni GN=GK12697 PE=4 SV=1Length=182	Score = 76.6 bits (187), Expect = 2e-012
mapped-read 30589	F1UMNMG01AOWJK	Length=538	tr|A9U509|A9U509_PHYPA Predicted protein (Fragment) OS=Physcomitrella patens subsp. patens GN=PHYPADRAFT_156553 PE=4 SV=1Length=107	Score = 61.6 bits (148), Expect = 7e-008
mapped-read 30589	F1UMNMG01A8R5N	Length=328	tr|B4N5L0|B4N5L0_DROWI GK12697 (monooxygenase activity) OS=Drosophila willistoni GN=GK12697 PE=4 SV=1Length=182	Score = 74.3 bits (181), Expect = 8e-012
mapped-read 30589	F1UMNMG01BQIEM	Length=531	tr|B4N5L0|B4N5L0_DROWI GK12697 (monooxygenase activity) OS=Drosophila willistoni GN=GK12697 PE=4 SV=1Length=182	Score = 74.3 bits (181), Expect = 9e-012
mapped-read 30589	F1UMNMG01BFB3U	Length=414	tr|B4N5L0|B4N5L0_DROWI GK12697 (monooxygenase activity) OS=Drosophila willistoni GN=GK12697 PE=4 SV=1Length=182	Score = 73.2 bits (178), Expect = 2e-011
mapped-read 30589	F1UMNMG01BKH8K	Length=330	tr|B4N5L0|B4N5L0_DROWI GK12697 (monooxygenase activity) OS=Drosophila willistoni GN=GK12697 PE=4 SV=1Length=182	Score = 75.1 bits (183), Expect = 5e-012
mapped-read 30589	F1UMNMG01BQARH	Length=258	tr|B4N5L0|B4N5L0_DROWI GK12697 (monooxygenase activity) OS=Drosophila willistoni GN=GK12697 PE=4 SV=1Length=182	Score = 72.4 bits (176), Expect = 3e-011
mapped-read 30589	F1UMNMG01BVDSO	Length=237	tr|B4N5L0|B4N5L0_DROWI GK12697 (monooxygenase activity) OS=Drosophila willistoni GN=GK12697 PE=4 SV=1Length=182	Score = 73.2 bits (178), Expect = 2e-011
mapped-read 30589	F1UMNMG01AUP0Z	Length=343	tr|B4N5L0|B4N5L0_DROWI GK12697 (monooxygenase activity) OS=Drosophila willistoni GN=GK12697 PE=4 SV=1Length=182	Score = 67.0 bits (162), Expect = 1e-009
mapped-read 30589	F1UMNMG01A5T6Q	Length=350	tr|B4N5L0|B4N5L0_DROWI GK12697 (monooxygenase activity) OS=Drosophila willistoni GN=GK12697 PE=4 SV=1Length=182	Score = 74.3 bits (181), Expect = 9e-012
mapped-read 30589	F1UMNMG01BTGKI	Length=198	No Hit
mapped-read 15118	F1UMNMG01B2KE4	Length=568	No Hit
mapped-read 15118	F1UMNMG01BRCH3	Length=483	No Hit
mapped-read 15118	F1UMNMG01BKEQC	Length=561	No Hit
mapped-read 15118	F1UMNMG01CERQB	Length=547	No Hit
mapped-read 15118	F1UMNMG01BEHBE	Length=555	No Hit
mapped-read 15118	F1UMNMG01CD31G	Length=488	tr|E9HM72|E9HM72_DAPPU CTR1, high-affinity copper uptake protein 1, copper transporter 1, solute carrier family 31 member 1 OS=Daphnia pulex GN=CTR1 PE=4 SV=1Length=171	Score = 85.5 bits (210), Expect = 4e-015
mapped-read 15118	F1UMNMG01CN0DT	Length=491	tr|E3WUT6|E3WUT6_ANODA Putative uncharacterized protein (copper ion transmembrane transporter activity) OS=Anopheles darlingi GN=AND_07278 PE=4 SV=1Length=153	Score = 101 bits (251), Expect = 7e-020
mapped-read 15118	F1UMNMG01B1N0G	Length=849	No Hit
mapped-read 15118	F1UMNMG01B7C93	Length=482	tr|E3WUT6|E3WUT6_ANODA Putative uncharacterized protein (copper ion transmembrane transporter activity) OS=Anopheles darlingi GN=AND_07278 PE=4 SV=1Length=153	Score = 102 bits (255), Expect = 2e-020
mapped-read 15118	F1UMNMG01BJZLN	Length=488	tr|E3WUT6|E3WUT6_ANODA Putative uncharacterized protein (copper ion transmembrane transporter activity) OS=Anopheles darlingi GN=AND_07278 PE=4 SV=1Length=153	Score = 101 bits (251), Expect = 7e-020
mapped-read 15118	F1UMNMG01ASHPP	Length=444	No Hit
mapped-read 15118	F1UMNMG01BOQN7	Length=479	No Hit
mapped-read 15118	F1UMNMG01BV6GA	Length=460	tr|E3WUT6|E3WUT6_ANODA Putative uncharacterized protein (copper ion transmembrane transporter activity) OS=Anopheles darlingi GN=AND_07278 PE=4 SV=1Length=153	Score = 99.4 bits (246), Expect = 2e-019
mapped-read 21297	F1UMNMG01CCJPA	Length=343	tr|E2ANF3|E2ANF3_CAMFO Putative uncharacterized protein OS=Camponotus floridanus GN=EAG_01178 PE=4 SV=1Length=298	Score = 58.9 bits (141), Expect = 4e-007
mapped-read 21297	F1UMNMG01A0HGF	Length=342	tr|E2ANF3|E2ANF3_CAMFO Putative uncharacterized protein OS=Camponotus floridanus GN=EAG_01178 PE=4 SV=1Length=298	Score = 58.9 bits (141), Expect = 4e-007
mapped-read 21297	F1UMNMG01BFZX6	Length=538	tr|G7K0E9|G7K0E9_MEDTR Cytochrome P450 likeTBP OS=Medicago truncatula GN=MTR_5g051190 PE=4 SV=1Length=656	Score = 82.4 bits (202), Expect = 3e-014
mapped-read 21297	F1UMNMG01A12EC	Length=342	tr|E2ANF3|E2ANF3_CAMFO Putative uncharacterized protein OS=Camponotus floridanus GN=EAG_01178 PE=4 SV=1Length=298	Score = 58.9 bits (141), Expect = 4e-007
mapped-read 21297	F1UMNMG01CEM6Q	Length=342	No Hit
mapped-read 21297	F1UMNMG01AVNN9	Length=342	tr|E2ANF3|E2ANF3_CAMFO Putative uncharacterized protein OS=Camponotus floridanus GN=EAG_01178 PE=4 SV=1Length=298	Score = 58.9 bits (141), Expect = 4e-007
mapped-read 21297	F1UMNMG01BQ3HD	Length=335	No Hit
mapped-read 21297	F1UMNMG01B5RZ8	Length=346	No Hit
mapped-read 21297	F1UMNMG01BS342	Length=337	No Hit
mapped-read 21297	F1UMNMG01A6JXF	Length=338	No Hit
mapped-read 21934	F1UMNMG01B11UX	Length=567	No Hit
mapped-read 21934	F1UMNMG01BV3XZ	Length=596	No Hit
mapped-read 21934	F1UMNMG01A7O03	Length=568	No Hit
mapped-read 21934	F1UMNMG01BN0JR	Length=566	No Hit
mapped-read 21934	F1UMNMG01CJ5LG	Length=567	No Hit
mapped-read 21934	F1UMNMG01BJG54	Length=575	No Hit
mapped-read 21934	F1UMNMG01B3RUQ	Length=645	No Hit
mapped-read 4366	F1UMNMG01CBEDR	Length=193	No Hit
mapped-read 4366	F1UMNMG01ANE6W	Length=192	No Hit
mapped-read 4366	F1UMNMG01B0XT5	Length=192	No Hit
mapped-read 4366	F1UMNMG01BRO2R	Length=193	No Hit
mapped-read 4366	F1UMNMG01A963V	Length=194	No Hit
mapped-read 17575	F1UMNMG01APIG7	Length=479	tr|D3TLF2|D3TLF2_GLOMM Adenosine monophosphate deaminase OS=Glossina morsitans morsitans PE=2 SV=1Length=774	Score = 232 bits (592), Expect(2) = 5e-067
mapped-read 17575	F1UMNMG01BJ9O8	Length=485	tr|D3TLF2|D3TLF2_GLOMM Adenosine monophosphate deaminase OS=Glossina morsitans morsitans PE=2 SV=1Length=774	Score = 214 bits (545), Expect(2) = 1e-063
mapped-read 17575	F1UMNMG01A44AL	Length=482	tr|D3TLF2|D3TLF2_GLOMM Adenosine monophosphate deaminase OS=Glossina morsitans morsitans PE=2 SV=1Length=774	Score = 272 bits (695), Expect = 2e-071
mapped-read 17575	F1UMNMG01AU3QN	Length=483	tr|D3TLF2|D3TLF2_GLOMM Adenosine monophosphate deaminase OS=Glossina morsitans morsitans PE=2 SV=1Length=774	Score = 214 bits (545), Expect(2) = 2e-064
mapped-read 10948	F1UMNMG01CGCY8	Length=520	tr|Q17IP0|Q17IP0_AEDAE Ctl2 (Fragment) Belongs to the CTL (choline transporter-like) family; family of proteins probably involved in transport through the plasma membrane OS=Aedes aegypti GN=AAEL002280 PE=4 SV=1Length=700	Score = 99.8 bits (247), Expect(2) = 1e-022
mapped-read 10948	F1UMNMG01AY53N	Length=503	tr|Q17IP0|Q17IP0_AEDAE Ctl2 (Fragment) Belongs to the CTL (choline transporter-like) family; family of proteins probably involved in transport through the plasma membrane OS=Aedes aegypti GN=AAEL002280 PE=4 SV=1Length=700	Score = 139 bits (349), Expect = 3e-031
mapped-read 10948	F1UMNMG01AZT7N	Length=495	tr|Q17IP0|Q17IP0_AEDAE Ctl2 (Fragment) Belongs to the CTL (choline transporter-like) family; family of proteins probably involved in transport through the plasma membrane OS=Aedes aegypti GN=AAEL002280 PE=4 SV=1Length=700	Score = 157 bits (396), Expect = 1e-036
mapped-read 10948	F1UMNMG01ARK4S	Length=465	tr|Q17IP0|Q17IP0_AEDAE Ctl2 (Fragment) Belongs to the CTL (choline transporter-like) family; family of proteins probably involved in transport through the plasma membrane OS=Aedes aegypti GN=AAEL002280 PE=4 SV=1Length=700	Score = 140 bits (354), Expect = 7e-032
mapped-read 9187	F1UMNMG01CF315	Length=550	No Hit
mapped-read 9187	F1UMNMG01BLJ62	Length=550	No Hit
mapped-read 9187	F1UMNMG01B84GL	Length=558	No Hit
mapped-read 638	F1UMNMG01BX4W6	Length=563	No Hit
mapped-read 638	F1UMNMG01BUYRQ	Length=571	No Hit
mapped-read 638	F1UMNMG01APVW2	Length=409	No Hit
mapped-read 25445	F1UMNMG01CD2IO	Length=498	No Hit
mapped-read 25445	F1UMNMG01BQ7R6	Length=476	No Hit
mapped-read 25445	F1UMNMG01AYWKJ	Length=478	No Hit
mapped-read 9190	F1UMNMG01BAPQX	Length=768	No Hit
mapped-read 9190	F1UMNMG01AWLAM	Length=587	No Hit
mapped-read 8996	F1UMNMG01AOTIG	Length=542	No Hit
mapped-read 8996	F1UMNMG01A5DCE	Length=498	tr|B4LT21|B4LT21_DROVI GJ10873 (Seryl-tRNA synthetase; seryl-tRNA aminoacylation) OS=Drosophila virilis GN=GJ10873 PE=3 SV=1Length=501	Score = 132 bits (333), Expect(2) = 3e-049
mapped-read 8522	F1UMNMG01AZ3VC	Length=515	No Hit
mapped-read 8522	F1UMNMG01A61QQ	Length=501	No Hit
mapped-read 8505	F1UMNMG01A8EEE	Length=578	No Hit
mapped-read 8505	F1UMNMG01AQTV0	Length=411	No Hit
mapped-read 7774	F1UMNMG01ASHNA	Length=564	No Hit
mapped-read 7774	F1UMNMG01BMXPH	Length=567	No Hit
mapped-read 6260	F1UMNMG01ATCQS	Length=561	tr|E0W1Z3|E0W1Z3_PEDHC Breast cancer type 2 susceptibility protein brca2, putative; double-strand break repair via homologous recombination; regulation of S phase of mitotic cell cycle OS=Pediculus humanus subsp. corporis GN=Phum_PHUM580760 PE=4 SV=1Length=1405	Score = 129 bits (324), Expect = 3e-028
mapped-read 6260	F1UMNMG01CK70B	Length=550	tr|E0W1Z3|E0W1Z3_PEDHC Breast cancer type 2 susceptibility protein brca2, putative; double-strand break repair via homologous recombination; regulation of S phase of mitotic cell cycle OS=Pediculus humanus subsp. corporis GN=Phum_PHUM580760 PE=4 SV=1Length=1405	Score = 118 bits (295), Expect = 6e-025
mapped-read 5929	F1UMNMG01BR22S	Length=346	No Hit
mapped-read 5929	F1UMNMG01ANIIE	Length=670	tr|B4N5L0|B4N5L0_DROWI GK12697 (monooxygenase activity) OS=Drosophila willistoni GN=GK12697 PE=4 SV=1Length=182	Score = 74.3 bits (181), Expect = 2e-011
mapped-read 5826	F1UMNMG01CEZMF	Length=478	tr|B0WNG3|B0WNG3_CULQU Oligosaccharyl transferase (N-linked glycosylation is a ubiquitous protein modification, and is essential for viability in eukaryotic cells) OS=Culex quinquefasciatus GN=CpipJ_CPIJ008679 PE=4 SV=1Length=777	Score = 220 bits (560), Expect = 1e-055
mapped-read 5826	F1UMNMG01BC99S	Length=483	tr|B0WNG3|B0WNG3_CULQU Oligosaccharyl transferase (N-linked glycosylation is a ubiquitous protein modification, and is essential for viability in eukaryotic cells) OS=Culex quinquefasciatus GN=CpipJ_CPIJ008679 PE=4 SV=1Length=777	Score = 161 bits (407), Expect(2) = 3e-050
mapped-read 5231	F1UMNMG01CHFR5	Length=516	tr|Q16UB8|Q16UB8_AEDAE Putative uncharacterized protein (Apolipophorins; lipid transporter activity) OS=Aedes aegypti GN=AAEL009955 PE=4 SV=1Length=3321	Score = 181 bits (460), Expect = 4e-044
mapped-read 5231	F1UMNMG01B73K8	Length=515	tr|Q16UB8|Q16UB8_AEDAE Putative uncharacterized protein (Apolipophorins; lipid transporter activity) OS=Aedes aegypti GN=AAEL009955 PE=4 SV=1Length=3321	Score = 101 bits (252), Expect(2) = 9e-039
mapped-read 4238	F1UMNMG01B1H8C	Length=594	No Hit
mapped-read 4238	F1UMNMG01CIGVQ	Length=604	No Hit
mapped-read 3932	F1UMNMG01A27NQ	Length=794	No Hit
mapped-read 3932	F1UMNMG01CIDPT	Length=610	No Hit
mapped-read 34756	F1UMNMG01A4RQB	Length=366	No Hit
mapped-read 34756	F1UMNMG01BEORN	Length=366	No Hit
mapped-read 33170	F1UMNMG01COLNC	Length=508	tr|E2AL58|E2AL58_CAMFO Centrosomal protein of 164 kDa; Rsp5 or WWP domain; protein binding; It is frequently associated with other domains typical for proteins in signal transduction processes OS=Camponotus floridanus GN=EAG_04638 PE=4 SV=1Length=1335	Score = 63.9 bits (154), Expect = 1e-008
mapped-read 33170	F1UMNMG01ANLFE	Length=505	tr|B4L5G9|B4L5G9_DROMO GI21515 (WW_Rsp5_WWP; protein binding; It is frequently associated with other domains typical for proteins in signal transduction processes) OS=Drosophila mojavensis GN=GI21515 PE=4 SV=1Length=1483	Score = 58.5 bits (140), Expect = 5e-007
mapped-read 32328	F1UMNMG01AW7VE	Length=389	tr|Q9BIJ1|Q9BIJ1_DROVI Actin E2 OS=Drosophila virilis GN=ActE2 PE=3 SV=1Length=376	Score = 171 bits (434), Expect = 4e-041
mapped-read 32328	F1UMNMG01BLL1I	Length=453	tr|Q9BIJ1|Q9BIJ1_DROVI Actin E2 OS=Drosophila virilis GN=ActE2 PE=3 SV=1Length=376	Score = 171 bits (434), Expect = 4e-041
mapped-read 29942	F1UMNMG01CJC22	Length=553	No Hit
mapped-read 29942	F1UMNMG01BHESG	Length=554	No Hit
mapped-read 28873	F1UMNMG01B8GVC	Length=483	No Hit
mapped-read 28873	F1UMNMG01BFROT	Length=485	No Hit
mapped-read 26544	F1UMNMG01BENHZ	Length=410	tr|Q16YC2|Q16YC2_AEDAE Tep3 (negative regulation of endopeptidase activity) OS=Aedes aegypti GN=AAEL008607 PE=4 SV=1Length=1451	Score = 123 bits (309), Expect = 1e-026
mapped-read 26544	F1UMNMG01BEYRU	Length=501	tr|Q16YC2|Q16YC2_AEDAE Tep3 (negative regulation of endopeptidase activity) OS=Aedes aegypti GN=AAEL008607 PE=4 SV=1Length=1451	Score = 152 bits (384), Expect(2) = 2e-044
mapped-read 25609	F1UMNMG01BXHVW	Length=552	No Hit
mapped-read 25609	F1UMNMG01BT8MR	Length=554	No Hit
mapped-read 24935	F1UMNMG01COS0O	Length=300	No Hit
mapped-read 24935	F1UMNMG01BJ5TH	Length=480	tr|B3ME14|B3ME14_DROAN GF13508 OS=Drosophila ananassae GN=GF13508 PE=4 SV=1Length=548	Score = 53.9 bits (128), Expect(2) = 1e-008
mapped-read 22853	F1UMNMG01CKXPO	Length=610	No Hit
mapped-read 22853	F1UMNMG01CD3I4	Length=567	No Hit
mapped-read 21417	F1UMNMG01BQBVC	Length=547	tr|E3WVT8|E3WVT8_ANODA Putative uncharacterized protein (malate dehydrogenase 2; cellular carbohydrate metabolic process) OS=Anopheles darlingi GN=AND_07877 PE=3 SV=1Length=1337	Score = 142 bits (357), Expect(2) = 2e-038
mapped-read 21417	F1UMNMG01AONX6	Length=546	tr|Q7PYE7|Q7PYE7_ANOGA AGAP001903-PA (Mitochondrial malate dehydrogenase 2; cellular carbohydrate metabolic process) OS=Anopheles gambiae GN=AGAP001903 PE=3 SV=4Length=337	Score = 182 bits (463), Expect = 2e-044
mapped-read 20522	F1UMNMG01BYC4O	Length=540	No Hit
mapped-read 20522	F1UMNMG01CDZB1	Length=570	No Hit
mapped-read 19222	F1UMNMG01BYYMI	Length=388	No Hit
mapped-read 19222	F1UMNMG01AQ8OU	Length=395	No Hit
mapped-read 17984	F1UMNMG01B00RQ	Length=471	tr|A7UU65|A7UU65_ANOGA AGAP006260-PD (Z band alternatively spliced PDZ-motif protein 66, isoform I; mesoderm development) OS=Anopheles gambiae GN=AGAP006260 PE=4 SV=1Length=243	Score = 106 bits (265), Expect = 2e-021
mapped-read 17984	F1UMNMG01CHPZU	Length=268	tr|Q86BH6|Q86BH6_DROME Z band alternatively spliced PDZ-motif protein 66, isoform I (mesoderm development) OS=Drosophila melanogaster GN=Zasp66 PE=2 SV=1Length=215	Score = 73.2 bits (178), Expect = 2e-011
mapped-read 17585	F1UMNMG01CG0I7	Length=498	tr|Q7PS03|Q7PS03_ANOGA AGAP000579-PA (cholesterol transport) OS=Anopheles gambiae GN=AgaP_AGAP000579 PE=4 SV=5Length=1279	Score = 53.5 bits (127), Expect(2) = 6e-015
mapped-read 17585	F1UMNMG01BLJ79	Length=495	tr|Q7PS03|Q7PS03_ANOGA AGAP000579-PA (cholesterol transport) OS=Anopheles gambiae GN=AgaP_AGAP000579 PE=4 SV=5Length=1279	Score = 53.5 bits (127), Expect(2) = 1e-010
mapped-read 14207	F1UMNMG01CIJ19	Length=516	tr|H9JGA4|H9JGA4_BOMMO Uncharacterized protein (belongs to the heat shock protein 70 family) OS=Bombyx mori PE=4 SV=1Length=908	Score = 61.6 bits (148), Expect(2) = 4e-017
mapped-read 14207	F1UMNMG01A4WJJ	Length=539	tr|Q7PYB0|Q7PYB0_ANOGA AGAP001827-PA (belongs to the heat shock protein 70 family) OS=Anopheles gambiae GN=AgaP_AGAP001827 PE=3 SV=3Length=968	Score = 155 bits (391), Expect(3) = 9e-051
mapped-read 12345	F1UMNMG01BBJ15	Length=350	No Hit
mapped-read 12345	F1UMNMG01BUXZP	Length=610	No Hit
mapped-read 10488	F1UMNMG01COQFW	Length=593	No Hit
mapped-read 10488	F1UMNMG01A36JR	Length=542	No Hit
mapped-read 9755	F1UMNMG01AVRXN	Length=294	No Hit
mapped-read 9695	F1UMNMG01AXEGR	Length=489	tr|B4Q7Y4|B4Q7Y4_DROSI GD21867 (Bicaudal-D_microtubule-assoc; BicD proteins are involved in dynein-mediated minus end-directed transport from the Golgi apparatus to the endoplasmic reticulum) OS=Drosophila simulans GN=GD21867 PE=4 SV=1Length=784	Score = 122 bits (305), Expect(2) = 2e-031
mapped-read 9365	F1UMNMG01A3N9G	Length=461	No Hit
mapped-read 9179	F1UMNMG01CO03Z	Length=573	tr|B3MKY9|B3MKY9_DROAN GF14935 (Bicaudal C, isoform B; Contains 2 KH domains; the KH domain binds RNA, and can function in RNA recognition) OS=Drosophila ananassae GN=GF14935 PE=4 SV=1Length=938	Score = 77.8 bits (190), Expect = 1e-012
mapped-read 8847	F1UMNMG01ATM4R	Length=339	No Hit
mapped-read 870	F1UMNMG01BC7ZE	Length=424	No Hit
mapped-read 8506	F1UMNMG01CIMU6	Length=418	tr|B4P902|B4P902_DROYA Domino (ATP binding; DNA binding; helicase activity) OS=Drosophila yakuba GN=dom PE=4 SV=1Length=3195	Score = 102 bits (253), Expect = 4e-020
mapped-read 8325	F1UMNMG01CH1SP	Length=481	tr|H9IEF4|H9IEF4_ATTCE Uncharacterized protein (Multidrug resistance protein 2 [Atp-binding cassette protein c]) OS=Atta cephalotes PE=4 SV=1Length=1587	Score = 106 bits (265), Expect = 2e-021
mapped-read 7838	F1UMNMG01BOQ4E	Length=527	tr|E3WM83|E3WM83_ANODA Putative uncharacterized protein (F-box only protein; protein ubiquitination) OS=Anopheles darlingi GN=AND_02054 PE=3 SV=1Length=1991	Score = 195 bits (495), Expect(2) = 4e-066
mapped-read 7570	F1UMNMG01CDP7H	Length=474	No Hit
mapped-read 7490	F1UMNMG01A5CM7	Length=584	No Hit
mapped-read 7145	F1UMNMG01B82AB	Length=467	No Hit
mapped-read 7114	F1UMNMG01AOQSE	Length=501	No Hit
mapped-read 6920	F1UMNMG01CM08G	Length=542	No Hit
mapped-read 6702	F1UMNMG01A9KYQ	Length=579	No Hit
mapped-read 6640	F1UMNMG01BYPCI	Length=617	No Hit
mapped-read 6552	F1UMNMG01CNGQ6	Length=575	tr|Q291L7|Q291L7_DROPS GA21076 (CWC16; eukaryotic proteins with undetermined function belonging to the CWC16 family) OS=Drosophila pseudoobscura pseudoobscura GN=GA21076 PE=4 SV=2Length=319	Score = 130 bits (326), Expect = 2e-028
mapped-read 6481	F1UMNMG01BTPDW	Length=567	No Hit
mapped-read 5923	F1UMNMG01BW859	Length=1259	No Hit
mapped-read 5707	F1UMNMG01ANL1C	Length=511	No Hit
mapped-read 5650	F1UMNMG01AY2BW	Length=408	No Hit
mapped-read 55	F1UMNMG01BN5OD	Length=573	No Hit
mapped-read 5378	F1UMNMG01BT42O	Length=530	tr|G7K0E5|G7K0E5_MEDTR Putative uncharacterized protein OS=Medicago truncatula GN=MTR_5g051150 PE=4 SV=1Length=2133	Score = 82.4 bits (202), Expect = 3e-014
mapped-read 5109	F1UMNMG01COD2A	Length=535	tr|B4M8E2|B4M8E2_DROVI GJ16794 (zinc ion binding) OS=Drosophila virilis GN=GJ16794 PE=4 SV=1Length=5248	Score = 83.6 bits (205), Expect(3) = 9e-021
mapped-read 5018	F1UMNMG01BUXQG	Length=661	No Hit
mapped-read 4960	F1UMNMG01ANQ45	Length=487	No Hit
mapped-read 4865	F1UMNMG01A27WJ	Length=491	No Hit
mapped-read 4537	F1UMNMG01APHP7	Length=342	No Hit
mapped-read 444	F1UMNMG01BUSKD	Length=517	tr|D0UR85|D0UR85_ISCVE Glycogen synthase (Fragment) OS=Ischnura verticalis PE=2 SV=1Length=303	Score = 202 bits (514), Expect(2) = 7e-072
mapped-read 4116	F1UMNMG01BPRTM	Length=562	No Hit
mapped-read 3896	F1UMNMG01CNPWR	Length=467	tr|B4N5X0|B4N5X0_DROWI Belongs to the sodium:neurotransmitter symporter (SNF) family; OS=Drosophila willistoni GN=GK17955 PE=3 SV=1Length=750	Score = 183 bits (465), Expect(2) = 8e-051
mapped-read 3834	F1UMNMG01AY8DM	Length=499	tr|Q178E8|Q178E8_AEDAE ATP-binding cassette transporter OS=Aedes aegypti GN=AAEL005929 PE=3 SV=1Length=1413	Score = 133 bits (335), Expect(3) = 4e-043
mapped-read 3796	F1UMNMG01BD3NC	Length=611	No Hit
mapped-read 35622	F1UMNMG01B1B2H	Length=536	No Hit
mapped-read 35572	F1UMNMG01BCBB9	Length=465	tr|H9HCJ2|H9HCJ2_ATTCE Uncharacterized protein (Nesprin-1 [nuclear envelope spectrin repeat]; Actin-binding) OS=Atta cephalotes PE=4 SV=1Length=7090	Score = 195 bits (495), Expect = 3e-048
mapped-read 35571	F1UMNMG01BH4H0	Length=454	tr|H9HCJ2|H9HCJ2_ATTCE Uncharacterized protein (Nesprin-1 [nuclear envelope spectrin repeat]; Actin-binding) OS=Atta cephalotes PE=4 SV=1Length=7090	Score = 65.9 bits (159), Expect(2) = 3e-018
mapped-read 3525	F1UMNMG01BLH07	Length=410	No Hit
mapped-read 35212	F1UMNMG01BXU87	Length=279	No Hit
mapped-read 34993	F1UMNMG01B1P9L	Length=509	No Hit
mapped-read 34935	F1UMNMG01BZT0I	Length=496	tr|H9HCC6|H9HCC6_ATTCE Uncharacterized protein (Fragment) (protein serine/threonine kinase activity; ATP binding) OS=Atta cephalotes PE=4 SV=1Length=705	Score = 214 bits (546), Expect = 4e-054
mapped-read 34912	F1UMNMG01BKZGS	Length=564	tr|Q94977|Q94977_LUCCU PC2-like prohormone convertase (Belongs to the peptidase S8 family; proteolysis; serine-type endopeptidase activity) OS=Lucilia cuprina PE=2 SV=1Length=675	Score = 72.4 bits (176), Expect = 4e-011
mapped-read 34911	F1UMNMG01A8UPG	Length=564	No Hit
mapped-read 3422	F1UMNMG01B5IL8	Length=394	No Hit
mapped-read 33946	F1UMNMG01A6MJ0	Length=758	No Hit
mapped-read 33875	F1UMNMG01AXQRI	Length=486	tr|Q17BQ6|Q17BQ6_AEDAE Cyclin g OS=Aedes aegypti GN=AAEL004865 PE=3 SV=1Length=476	Score = 99.0 bits (245), Expect(2) = 2e-035
mapped-read 33295	F1UMNMG01B7AXM	Length=511	tr|B4JYB4|B4JYB4_DROGR GH14264 (Serine/threonine-protein phosphatase 4 regulatory subunit) OS=Drosophila grimshawi GN=GH14264 PE=4 SV=1Length=1040	Score = 114 bits (286), Expect(2) = 9e-046
mapped-read 33264	F1UMNMG01A4VKJ	Length=571	No Hit
mapped-read 32976	F1UMNMG01BTZ01	Length=524	tr|Q16UP6|Q16UP6_AEDAE Putative uncharacterized protein (Fragment) (Dpr7, isoform D; sensory perception of chemical stimulus) OS=Aedes aegypti GN=AAEL009841 PE=4 SV=1Length=200	Score = 117 bits (292), Expect = 1e-024
mapped-read 32940	F1UMNMG01B6WN7	Length=472	tr|E1JHJ5|E1JHJ5_DROME Myosin heavy chain, isoform P OS=Drosophila melanogaster GN=Mhc PE=4 SV=1Length=1949	Score = 219 bits (559), Expect = 1e-055
mapped-read 32134	F1UMNMG01CDEYK	Length=497	tr|B0W4H2|B0W4H2_CULQU Myosin-VIIa OS=Culex quinquefasciatus GN=CpipJ_CPIJ001741 PE=4 SV=1Length=2076	Score = 137 bits (345), Expect(2) = 5e-059
mapped-read 31004	F1UMNMG01BUSUW	Length=417	tr|Q171S2|Q171S2_AEDAE Vacuolar protein sorting-associated protein (Vps13d) (Fragment); Proteins in this entry may play a role in the control of protein cycling through the trans-Golgi network OS=Aedes aegypti GN=AAEL007551 PE=4 SV=1Length=3926	Score = 122 bits (307), Expect = 2e-026
mapped-read 30997	F1UMNMG01BY220	Length=506	No Hit
mapped-read 30839	F1UMNMG01A23S1	Length=596	No Hit
mapped-read 30706	F1UMNMG01A0EUJ	Length=586	No Hit
mapped-read 30690	F1UMNMG01B6SRG	Length=504	tr|B4MYN1|B4MYN1_DROWI Elongation factor 1-alpha (Protein biosynthesis) OS=Drosophila willistoni GN=GK22048 PE=3 SV=1Length=463	Score = 195 bits (495), Expect = 3e-048
mapped-read 30505	F1UMNMG01BK1L1	Length=570	No Hit
mapped-read 29936	F1UMNMG01B3NY4	Length=1536	No Hit
mapped-read 2993	F1UMNMG01A5ZOF	Length=424	No Hit
mapped-read 29662	F1UMNMG01APHOY	Length=475	No Hit
mapped-read 29430	F1UMNMG01CNE97	Length=543	No Hit
mapped-read 29342	F1UMNMG01A75GZ	Length=331	tr|B0W745|B0W745_CULQU Retinoid-inducible serine carboxypeptidase (proteolysis) OS=Culex quinquefasciatus GN=CpipJ_CPIJ002911 PE=4 SV=1Length=446	Score = 134 bits (337), Expect = 7e-030
mapped-read 29322	F1UMNMG01AVT0H	Length=871	No Hit
mapped-read 29248	F1UMNMG01BYZ3V	Length=451	No Hit
mapped-read 28934	F1UMNMG01CBR3L	Length=488	tr|Q16KW5|Q16KW5_AEDAE Forkhead box, sub-group O, putative (transcription factor) OS=Aedes aegypti GN=AAEL012847 PE=4 SV=1Length=403	Score = 196 bits (497), Expect = 2e-048
mapped-read 28677	F1UMNMG01BDORY	Length=509	tr|B0WEB3|B0WEB3_CULQU Fatty acid synthase S-acetyltransferase (biosynthetic process) OS=Culex quinquefasciatus GN=CpipJ_CPIJ005595 PE=4 SV=1Length=2419	Score = 74.7 bits (182), Expect(2) = 1e-014
mapped-read 28581	F1UMNMG01CHSBJ	Length=444	tr|Q17F22|Q17F22_AEDAE Purine biosynthesis protein 6, pur6 ('de novo' IMP biosynthetic process) OS=Aedes aegypti GN=AAEL003606 PE=4 SV=1Length=427	Score = 187 bits (475), Expect = 7e-046
mapped-read 28541	F1UMNMG01BM2MQ	Length=546	tr|B3N0J2|B3N0J2_DROAN GF21709 (Microsomal glutathione S-transferase-like, isoform B; MAPEG-like_dom; This domain is found in a widespread superfamily known as MAPEG (Membrane Associated Proteins in Eicosanoid and Glutathione metabolism) OS=Drosophila ananassae GN=GF21709 PE=4 SV=1Length=195	Score = 109 bits (272), Expect = 3e-022
mapped-read 28381	F1UMNMG01B7YHP	Length=477	No Hit
mapped-read 28177	F1UMNMG01BS7X2	Length=542	tr|Q7PVH2|Q7PVH2_ANOGA AGAP009278-PA (Phosphorylase b kinase beta; glycogen metabolic process) OS=Anopheles gambiae GN=AGAP009278 PE=4 SV=4Length=1065	Score = 125 bits (314), Expect = 4e-027
mapped-read 2800	F1UMNMG01CPWQT	Length=316	No Hit
mapped-read 27841	F1UMNMG01B2P8G	Length=544	No Hit
mapped-read 27781	F1UMNMG01ANXVR	Length=340	tr|Q16KT4|Q16KT4_AEDAE Putative uncharacterized protein (COPII vesicle coating; the addition of COPII proteins and adaptor proteins to ER membranes during the formation of transport vesicles, forming a vesicle coat) OS=Aedes aegypti GN=AAEL012880 PE=4 SV=1Length=802	Score = 104 bits (260), Expect = 6e-021
mapped-read 27738	F1UMNMG01BSGWG	Length=396	No Hit
mapped-read 27608	F1UMNMG01B4XG8	Length=526	No Hit
mapped-read 27281	F1UMNMG01B7VQJ	Length=501	tr|Q7Q8C2|Q7Q8C2_ANOGA AGAP008698-PA (Fragment) (Chromodomain-helicase-DNA-binding protein 1; ATP-dependent helicase activity, DNA binding, ATP binding) OS=Anopheles gambiae GN=AGAP008698 PE=4 SV=4Length=2083	Score = 138 bits (348), Expect = 4e-031
mapped-read 27098	F1UMNMG01CAWK2	Length=500	No Hit
mapped-read 26867	F1UMNMG01B1OLX	Length=495	tr|G8FU55|G8FU55_APIME Hunchback (Znf_C2H2/integrase_DNA-bd; this entry represents the C2H2-type zinc finger domain [11], as well as the DNA-binding domain of certain integrases) OS=Apis mellifera GN=hb PE=2 SV=1Length=646	Score = 180 bits (456), Expect = 1e-043
mapped-read 26764	F1UMNMG01A04BJ	Length=538	tr|D3TMM8|D3TMM8_GLOMM Ras suppressor protein (This gene encodes a protein that is involved in the Ras signal transduction pathway, growth inhibition, and nerve-growth factor induced differentiation processes) OS=Glossina morsitans morsitans PE=2 SV=1Length=289	Score = 182 bits (463), Expect(3) = 3e-067
mapped-read 26736	F1UMNMG01BQS9X	Length=578	No Hit
mapped-read 26704	F1UMNMG01CE54U	Length=507	No Hit
mapped-read 26611	F1UMNMG01APBDT	Length=500	tr|Q7QHI8|Q7QHI8_ANOGA AGAP011201-PA (Fragment) (TLC-dom; Transmembrane helix; Proteins containing this domain may possess multiple functions such as lipid trafficking, metabolism, or sensing) OS=Anopheles gambiae GN=AGAP011201 PE=4 SV=4Length=113	Score = 65.5 bits (158), Expect(2) = 4e-021
mapped-read 26610	F1UMNMG01BRP8X	Length=574	No Hit
mapped-read 26497	F1UMNMG01BTNRK	Length=552	No Hit
mapped-read 2647	F1UMNMG01CH78C	Length=563	No Hit
mapped-read 26442	F1UMNMG01AXR9S	Length=502	No Hit
mapped-read 26071	F1UMNMG01AY59V	Length=511	No Hit
mapped-read 25986	F1UMNMG01BK71K	Length=388	No Hit
mapped-read 25566	F1UMNMG01B4WQ2	Length=558	tr|B4PJH9|B4PJH9_DROYA Dihydrolipoyl dehydrogenase, belongs to the class-I pyridine nucleotide-disulfide oxidoreductase family (cell redox homeostasis) OS=Drosophila yakuba GN=GE19931 PE=3 SV=1Length=504	Score = 216 bits (551), Expect = 1e-054
mapped-read 25449	F1UMNMG01BJVW1	Length=449	No Hit
mapped-read 25058	F1UMNMG01CG15R	Length=344	No Hit
mapped-read 24973	F1UMNMG01BRF00	Length=581	No Hit
mapped-read 24571	F1UMNMG01CCYPC	Length=535	No Hit
mapped-read 24426	F1UMNMG01BBCMG	Length=522	No Hit
mapped-read 24422	F1UMNMG01AZIBO	Length=487	tr|B0W404|B0W404_CULQU Chorion peroxidase (response to oxidative stress) OS=Culex quinquefasciatus GN=CpipJ_CPIJ001764 PE=4 SV=1Length=685	Score = 160 bits (404), Expect = 1e-037
mapped-read 24258	F1UMNMG01BZGBR	Length=490	tr|B0W015|B0W015_CULQU Serine-type protease inhibitor (proteolysis) OS=Culex quinquefasciatus GN=CpipJ_CPIJ000379 PE=4 SV=1Length=1032	Score = 74.3 bits (181), Expect = 9e-012
mapped-read 24012	F1UMNMG01CNG83	Length=363	No Hit
mapped-read 23764	F1UMNMG01A54OL	Length=563	No Hit
mapped-read 23521	F1UMNMG01BUNQJ	Length=506	tr|Q16KZ7|Q16KZ7_AEDAE Transcription factor E2f, putative (DE2F) (transcription, DNA-dependent) OS=Aedes aegypti GN=AAEL012817 PE=3 SV=1Length=662	Score = 68.2 bits (165), Expect = 6e-010
mapped-read 23452	F1UMNMG01B1X4T	Length=586	No Hit
mapped-read 23288	F1UMNMG01BL95V	Length=469	tr|Q16T27|Q16T27_AEDAE Beclin ( autophagy, the process in which cells digest parts of their own cytoplasm; allows for both recycling of macromolecular constituents under conditions of cellular stress and remodeling the intracellular structure for cell differentiation) OS=Aedes aegypti GN=AAEL010427 PE=4 SV=1Length=426	Score = 169 bits (427), Expect = 3e-040
mapped-read 23188	F1UMNMG01A3VX0	Length=370	No Hit
mapped-read 23004	F1UMNMG01B528B	Length=544	No Hit
mapped-read 22934	F1UMNMG01BJSE2	Length=458	tr|E3WN74|E3WN74_ANODA Putative uncharacterized protein (SH3 domain-binding protein 5 (SH3BP5); the SH3 domain-binding protein inhibits the auto and transphophorylation of BTK and acts as a negative regulator of BTK-related signalling in B cells; is involved in JNK cascade, a cascade of protein kinase activities, culminating in the phosphorylation and activation of a member of the JUN kinase subf…	Score = 84.0 bits (206), Expect(2) = 1e-024
mapped-read 22837	F1UMNMG01CLESE	Length=524	No Hit
mapped-read 22698	F1UMNMG01BFRXP	Length=315	No Hit
mapped-read 22415	F1UMNMG01BTTS2	Length=509	No Hit
mapped-read 22354	F1UMNMG01AVUI9	Length=405	No Hit
mapped-read 22047	F1UMNMG01AV5TV	Length=510	No Hit
mapped-read 21991	F1UMNMG01AWE45	Length=526	No Hit
mapped-read 21696	F1UMNMG01BF3YC	Length=608	No Hit
mapped-read 21255	F1UMNMG01CD8GK	Length=511	tr|Q16MH2|Q16MH2_AEDAE Putative uncharacterized protein (Anoctamin; This family contains the anoctamin/TMEM16 proteins which are thought to be calcium-dependent chloride channel) OS=Aedes aegypti GN=AAEL012293 PE=4 SV=1Length=863	Score = 64.7 bits (156), Expect(4) = 1e-026
mapped-read 21135	F1UMNMG01CBJU7	Length=674	No Hit
mapped-read 20905	F1UMNMG01A7K9H	Length=502	tr|Q0IFH5|Q0IFH5_AEDAE Phd finger protein (Zinc_finger_PHD-type_CS; this entry represents the PHD (homeodomain) zinc finger domain, which is a C4HC3 zinc-finger-like motif found in nuclear proteins thought to be involved in chromatin-mediated transcriptional regulation) OS=Aedes aegypti GN=AAEL004834 PE=4 SV=1Length=2274	Score = 73.9 bits (180), Expect = 1e-011
mapped-read 2085	F1UMNMG01BSRJP	Length=535	No Hit
mapped-read 20345	F1UMNMG01BOIY0	Length=621	No Hit
mapped-read 19908	F1UMNMG01B0XAO	Length=533	tr|Q17F89|Q17F89_AEDAE Putative uncharacterized protein (Fragment) (Zinc finger, C2H2-like; This entry represents the classical C2H2 zinc finger domain; Zinc finger (Znf) domains are now recognised to bind DNA, RNA, protein and/or lipid substrates) OS=Aedes aegypti GN=AAEL003489 PE=4 SV=1Length=781	Score = 54.3 bits (129), Expect(2) = 4e-007
mapped-read 19798	F1UMNMG01A3UUY	Length=290	No Hit
mapped-read 19763	F1UMNMG01B6X66	Length=632	No Hit
mapped-read 19724	F1UMNMG01AS9IU	Length=667	No Hit
mapped-read 19657	F1UMNMG01CHQ7L	Length=522	No Hit
mapped-read 1916	F1UMNMG01B83GT	Length=512	tr|F1NGA2|F1NGA2_CHICK ATP synthase subunit alpha (Fragment) (ATP hydrolysis and synthesis coupled proton transport) OS=Gallus gallus GN=ATP5A1 PE=3 SV=1Length=555	Score = 263 bits (671), Expect(2) = 1e-068
mapped-read 18462	F1UMNMG01BL9LK	Length=600	No Hit
mapped-read 17834	F1UMNMG01APER7	Length=580	No Hit
mapped-read 17549	F1UMNMG01BM7KW	Length=504	tr|Q1HQV5|Q1HQV5_AEDAE Mitochondrial aldehyde dehydrogenase (oxidoreductase activity, acting on the aldehyde or oxo group of donors, NAD or NADP as acceptor) OS=Aedes aegypti PE=2 SV=1Length=516	Score = 182 bits (463), Expect(2) = 1e-057
mapped-read 17546	F1UMNMG01AZIHV	Length=485	tr|Q7PMK0|Q7PMK0_ANOGA AGAP010767-PA (Fragment) (intracellular signal transduction; regulation of Rho protein signal transduction; termination of G-protein coupled receptor signaling pathway; The members of the Rho GTPase family have been shown to regulate many aspects of intracellular actin dynamics, have been described as "molecular switches" and play a role in cell proliferation, apoptosis, ge…	Score = 67.0 bits (162), Expect = 1e-009
mapped-read 17419	F1UMNMG01ASFWP	Length=486	No Hit
mapped-read 17349	F1UMNMG01AP4UM	Length=434	No Hit
mapped-read 17303	F1UMNMG01A50BS	Length=563	No Hit
mapped-read 16804	F1UMNMG01B3GQ0	Length=528	No Hit
mapped-read 16244	F1UMNMG01AZXP5	Length=637	No Hit
mapped-read 16168	F1UMNMG01A7GLK	Length=474	tr|B5DKT1|B5DKT1_DROPS GA22778 (Znf_RING; zinc ion binding; E3 ubiquitin-protein ligase activity is intrinsic to the RING domain of c-Cbl and is likely to be a general function of this domain; Various RING fingers exhibit binding activity towards E2 ubiquitin-conjugating enzymes) OS=Drosophila pseudoobscura pseudoobscura GN=GA22778 PE=4 SV=1Length=1611	Score = 94.4 bits (233), Expect = 8e-018
mapped-read 15380	F1UMNMG01BA73D	Length=298	No Hit
mapped-read 1520	F1UMNMG01A7BAZ	Length=477	tr|B0W5T7|B0W5T7_CULQU E3 ubiquitin-protein ligase HECTD1 (ubiquitin-protein ligase activity; metal ion binding) OS=Culex quinquefasciatus GN=CpipJ_CPIJ002462 PE=4 SV=1Length=2813	Score = 158 bits (400), Expect = 3e-037
mapped-read 15123	F1UMNMG01CC8PO	Length=549	No Hit
mapped-read 14835	F1UMNMG01CFDKE	Length=495	No Hit
mapped-read 14511	F1UMNMG01CKH7P	Length=455	No Hit
mapped-read 13948	F1UMNMG01BF0S0	Length=445	No Hit
mapped-read 13812	F1UMNMG01CJS7W	Length=553	tr|B4N317|B4N317_DROWI GK12606 (Ig_I-set; Ig-like domains are involved in a variety of functions, including cell-cell recognition, cell-surface receptors, muscle structure and the immune system) OS=Drosophila willistoni GN=GK12606 PE=4 SV=1Length=2718	Score = 90.1 bits (222), Expect(2) = 5e-026
mapped-read 13649	F1UMNMG01AM6EK	Length=482	tr|B0WP74|B0WP74_CULQU Putative uncharacterized protein (Myosin-rhogap protein; intracellular signal transduction) OS=Culex quinquefasciatus GN=CpipJ_CPIJ008896 PE=4 SV=1Length=1030	Score = 251 bits (642), Expect = 3e-065
mapped-read 13641	F1UMNMG01B40VJ	Length=454	No Hit
mapped-read 13552	F1UMNMG01B8CXN	Length=588	tr|E3X463|E3X463_ANODA Putative uncharacterized protein (Putative fatty acid synthase S-acetyltransferase; biosynthetic process) OS=Anopheles darlingi GN=AND_13167 PE=4 SV=1Length=1517	Score = 89.4 bits (220), Expect = 4e-016
mapped-read 13418	F1UMNMG01B8PHS	Length=285	No Hit
mapped-read 1333	F1UMNMG01AR7UI	Length=529	No Hit
mapped-read 13207	F1UMNMG01CJD5U	Length=394	No Hit
mapped-read 13151	F1UMNMG01BCITK	Length=407	No Hit
mapped-read 13044	F1UMNMG01A2LVB	Length=483	tr|B0WLA2|B0WLA2_CULQU Exocyst complex component 3 (Sec6 is a component of the multiprotein exocyst complex. Exocyst proteins localise to regions of active exocytosis in an F-actin-dependent and exocytosis- independent manner) OS=Culex quinquefasciatus GN=CpipJ_CPIJ007822 PE=4 SV=1Length=717	Score = 173 bits (439), Expect(2) = 1e-057
mapped-read 12975	F1UMNMG01BJS2J	Length=568	No Hit
mapped-read 12664	F1UMNMG01CFUGV	Length=535	No Hit
mapped-read 12582	F1UMNMG01CD0Z4	Length=532	No Hit
mapped-read 12467	F1UMNMG01A2XMT	Length=556	No Hit
mapped-read 12445	F1UMNMG01BNCPT	Length=436	No Hit
mapped-read 12234	F1UMNMG01CNK5B	Length=554	No Hit
mapped-read 1207	F1UMNMG01CHL1X	Length=469	tr|B4H5Z4|B4H5Z4_DROPE GL24674 (nucleic acid binding, zinc ion binding) OS=Drosophila persimilis GN=GL24674 PE=4 SV=1Length=987	Score = 75.9 bits (185), Expect(2) = 8e-028
mapped-read 12069	F1UMNMG01CMI34	Length=502	tr|Q16TW3|Q16TW3_AEDAE Putative uncharacterized protein (Maternal protein exuperantia; Ensures the proper localization of the mRNA of the bicoid gene to the anterior regions of the oocyte thus playing a fundamental role in the establishment of the polarity of the oocyte. May bind the bcd mRNA; multicellular organismal development) OS=Aedes aegypti GN=AAEL010097 PE=4 SV=1Length=599	Score = 50.1 bits (118), Expect(3) = 6e-015
mapped-read 11812	F1UMNMG01BDVU9	Length=609	No Hit
mapped-read 11457	F1UMNMG01B4SOQ	Length=486	No Hit
mapped-read 11400	F1UMNMG01BWO6C	Length=305	No Hit
mapped-read 11303	F1UMNMG01CEB5N	Length=379	No Hit
mapped-read 11254	F1UMNMG01B4FJV	Length=253	No Hit
mapped-read 11246	F1UMNMG01BAWME	Length=488	No Hit
mapped-read 1088	F1UMNMG01COYF9	Length=584	No Hit
mapped-read 10464	F1UMNMG01CKO2G	Length=624	No Hit
mapped-read 10435	F1UMNMG01BO447	Length=550	No Hit
mapped-read 10109	F1UMNMG01AOQHZ	Length=460	tr|B4NFV5|B4NFV5_DROWI GK22457 (Contains 1 RING-type zinc finger; zinc ion binding; The function of this domain is not yet known but it could be involved in protein-protein interaction and be important for the assembly or activity of multicomponent complexes involved in transcriptional activation or repression) OS=Drosophila willistoni GN=GK22457 PE=4 SV=1Length=1120	Score = 182 bits (462), Expect(2) = 7e-050
mapped-read 10107	F1UMNMG01B0UJ1	Length=544	tr|Q17FJ9|Q17FJ9_AEDAE Putative uncharacterized protein (putative salivary mucin; chitin metabolic process; chitin binding) OS=Aedes aegypti GN=AAEL003368 PE=4 SV=1Length=541	Score = 76.6 bits (187), Expect(2) = 4e-013
mapped-read 10041	F1UMNMG01BXB31	Length=405	No Hit

## Sheet: Contig assoc with gene function
					Biological process	Molecular function	Cellular component
Contig10107	F1UMNMG01B0UJ1	Length=544	tr|Q17FJ9|Q17FJ9_AEDAE Putative uncharacterized protein (putative salivary mucin; chitin metabolic process; chitin binding) OS=Aedes aegypti GN=AAEL003368 PE=4 SV=1Length=541	Score = 76.6 bits (187), Expect(2) = 4e-013				No Hit
Contig10109	F1UMNMG01AOQHZ	Length=460	tr|B4NFV5|B4NFV5_DROWI GK22457 (Contains 1 RING-type zinc finger; zinc ion binding; The function of this domain is not yet known but it could be involved in protein-protein interaction and be important for the assembly or activity of multicomponent complexes involved in transcriptional activation or repression) OS=Drosophila willistoni GN=GK22457 PE=4 SV=1Length=1120	Score = 182 bits (462), Expect(2) = 7e-050		zinc ion binding	intracellular	No Hit
Contig10948	F1UMNMG01CGCY8	Length=520	tr|Q17IP0|Q17IP0_AEDAE Ctl2 (Fragment) Belongs to the CTL (choline transporter-like) family; family of proteins probably involved in transport through the plasma membrane OS=Aedes aegypti GN=AAEL002280 PE=4 SV=1Length=700	Score = 99.8 bits (247), Expect(2) = 1e-022			integral to membrane	emb|AM096313.1| AM096313 Lutzomyia longipalpis Jacobina whole fly Lutzomyia longipalpis cDNA clone NSFM-82d04, mRNA sequence.Length=1191	Score = 525 bits (284), Expect = 1e-145
Contig10948	F1UMNMG01AY53N	Length=503	tr|Q17IP0|Q17IP0_AEDAE Ctl2 (Fragment) Belongs to the CTL (choline transporter-like) family; family of proteins probably involved in transport through the plasma membrane OS=Aedes aegypti GN=AAEL002280 PE=4 SV=1Length=700	Score = 139 bits (349), Expect = 3e-031			integral to membrane	emb|AM096313.1| AM096313 Lutzomyia longipalpis Jacobina whole fly Lutzomyia longipalpis cDNA clone NSFM-82d04, mRNA sequence.Length=1191	Score = 628 bits (340), Expect = 7e-177
Contig10948	F1UMNMG01AZT7N	Length=495	tr|Q17IP0|Q17IP0_AEDAE Ctl2 (Fragment) Belongs to the CTL (choline transporter-like) family; family of proteins probably involved in transport through the plasma membrane OS=Aedes aegypti GN=AAEL002280 PE=4 SV=1Length=700	Score = 157 bits (396), Expect = 1e-036			integral to membrane	emb|AM096313.1| AM096313 Lutzomyia longipalpis Jacobina whole fly Lutzomyia longipalpis cDNA clone NSFM-82d04, mRNA sequence.Length=1191	Score = 582 bits (315), Expect = 5e-163
Contig10948	F1UMNMG01ARK4S	Length=465	tr|Q17IP0|Q17IP0_AEDAE Ctl2 (Fragment) Belongs to the CTL (choline transporter-like) family; family of proteins probably involved in transport through the plasma membrane OS=Aedes aegypti GN=AAEL002280 PE=4 SV=1Length=700	Score = 140 bits (354), Expect = 7e-032			integral to membrane	emb|AM096313.1| AM096313 Lutzomyia longipalpis Jacobina whole fly Lutzomyia longipalpis cDNA clone NSFM-82d04, mRNA sequence.Length=1191	Score = 534 bits (289), Expect = 1e-148
Contig12069	F1UMNMG01CMI34	Length=502	tr|Q16TW3|Q16TW3_AEDAE Putative uncharacterized protein (Maternal protein exuperantia; Ensures the proper localization of the mRNA of the bicoid gene to the anterior regions of the oocyte thus playing a fundamental role in the establishment of the polarity of the oocyte. May bind the bcd mRNA; multicellular organismal development) OS=Aedes aegypti GN=AAEL010097 PE=4 SV=1Length=599	Score = 50.1 bits (118), Expect(3) = 6e-015				emb|AM106045.1| AM106045 Lutzomyia longipalpis Jacobina whole fly Lutzomyia longipalpis cDNA clone NSFM-108c01, mRNA sequence.Length=906	Score = 713 bits (386), Expect = 0.0
Contig1207	F1UMNMG01CHL1X	Length=469	tr|B4H5Z4|B4H5Z4_DROPE GL24674 (nucleic acid binding, zinc ion binding) OS=Drosophila persimilis GN=GL24674 PE=4 SV=1Length=987	Score = 75.9 bits (185), Expect(2) = 8e-028		nucleic acid binding; zinc ion binding	intracellular	No Hit
Contig13044	F1UMNMG01A2LVB	Length=483	tr|B0WLA2|B0WLA2_CULQU Exocyst complex component 3 (Sec6 is a component of the multiprotein exocyst complex. Exocyst proteins localise to regions of active exocytosis in an F-actin-dependent and exocytosis- independent manner) OS=Culex quinquefasciatus GN=CpipJ_CPIJ007822 PE=4 SV=1Length=717	Score = 173 bits (439), Expect(2) = 1e-057				No Hit
Contig13552	F1UMNMG01B8CXN	Length=588	tr|E3X463|E3X463_ANODA Putative uncharacterized protein (Putative fatty acid synthase S-acetyltransferase; biosynthetic process) OS=Anopheles darlingi GN=AND_13167 PE=4 SV=1Length=1517	Score = 89.4 bits (220), Expect = 4e-016	biosynthetic process	3-hydroxypalmitoyl-[acyl-carrier-protein] dehydratase activity; 3-oxoacyl-[acyl-carrier-protein] synthase activity; [acyl-carrier-protein] S-acetyltransferase activity; nucleotide binding; zinc ion binding		No Hit
Contig13649	F1UMNMG01AM6EK	Length=482	tr|B0WP74|B0WP74_CULQU Putative uncharacterized protein (Myosin-rhogap protein; intracellular signal transduction) OS=Culex quinquefasciatus GN=CpipJ_CPIJ008896 PE=4 SV=1Length=1030	Score = 251 bits (642), Expect = 3e-065	intracellular signal transduction	motor activity; ATP binding; metal ion binding	myosin complex	No Hit
Contig13812	F1UMNMG01CJS7W	Length=553	tr|B4N317|B4N317_DROWI GK12606 (Ig_I-set; Ig-like domains are involved in a variety of functions, including cell-cell recognition, cell-surface receptors, muscle structure and the immune system) OS=Drosophila willistoni GN=GK12606 PE=4 SV=1Length=2718	Score = 90.1 bits (222), Expect(2) = 5e-026				No Hit
Contig14207	F1UMNMG01CIJ19	Length=516	tr|H9JGA4|H9JGA4_BOMMO Uncharacterized protein (belongs to the heat shock protein 70 family) OS=Bombyx mori PE=4 SV=1Length=908	Score = 61.6 bits (148), Expect(2) = 4e-017		ATP binding		emb|AM095113.1| AM095113 Lutzomyia longipalpis Jacobina whole fly Lutzomyia longipalpis cDNA clone SFM-01e11, mRNA sequence.Length=1107	Score = 442 bits (239), Expect = 1e-120
Contig14207	F1UMNMG01A4WJJ	Length=539	tr|Q7PYB0|Q7PYB0_ANOGA AGAP001827-PA (belongs to the heat shock protein 70 family) OS=Anopheles gambiae GN=AgaP_AGAP001827 PE=3 SV=3Length=968	Score = 155 bits (391), Expect(3) = 9e-051		ATP binding		emb|AM095113.1| AM095113 Lutzomyia longipalpis Jacobina whole fly Lutzomyia longipalpis cDNA clone SFM-01e11, mRNA sequence.Length=1107	Score = 446 bits (241), Expect = 8e-122
Contig15118	F1UMNMG01CD31G	Length=488	tr|E9HM72|E9HM72_DAPPU CTR1, high-affinity copper uptake protein 1, copper transporter 1, solute carrier family 31 member 1 OS=Daphnia pulex GN=CTR1 PE=4 SV=1Length=171	Score = 85.5 bits (210), Expect = 4e-015		copper ion transmembrane transporter activity	integral to membrane	emb|AM093890.1| AM093890 Lutzomyia longipalpis Jacobina whole fly Lutzomyia longipalpis cDNA clone NSFM-89a05, mRNA sequence.Length=1250	Score = 767 bits (415), Expect = 0.0
Contig15118	F1UMNMG01CN0DT	Length=491	tr|E3WUT6|E3WUT6_ANODA Putative uncharacterized protein (copper ion transmembrane transporter activity) OS=Anopheles darlingi GN=AND_07278 PE=4 SV=1Length=153	Score = 101 bits (251), Expect = 7e-020		copper ion transmembrane transporter activity	integral to membrane	emb|AM093890.1| AM093890 Lutzomyia longipalpis Jacobina whole fly Lutzomyia longipalpis cDNA clone NSFM-89a05, mRNA sequence.Length=1250	Score = 798 bits (432), Expect = 0.0
Contig15118	F1UMNMG01B7C93	Length=482	tr|E3WUT6|E3WUT6_ANODA Putative uncharacterized protein (copper ion transmembrane transporter activity) OS=Anopheles darlingi GN=AND_07278 PE=4 SV=1Length=153	Score = 102 bits (255), Expect = 2e-020		copper ion transmembrane transporter activity	integral to membrane	emb|AM093889.1| AM093889 Lutzomyia longipalpis Jacobina whole fly Lutzomyia longipalpis cDNA clone NSFM-40b02, mRNA sequence.Length=1371	Score = 802 bits (434), Expect = 0.0
Contig15118	F1UMNMG01BJZLN	Length=488	tr|E3WUT6|E3WUT6_ANODA Putative uncharacterized protein (copper ion transmembrane transporter activity) OS=Anopheles darlingi GN=AND_07278 PE=4 SV=1Length=153	Score = 101 bits (251), Expect = 7e-020		copper ion transmembrane transporter activity	integral to membrane	emb|AM093890.1| AM093890 Lutzomyia longipalpis Jacobina whole fly Lutzomyia longipalpis cDNA clone NSFM-89a05, mRNA sequence.Length=1250	Score = 869 bits (470), Expect = 0.0
Contig15118	F1UMNMG01BV6GA	Length=460	tr|E3WUT6|E3WUT6_ANODA Putative uncharacterized protein (copper ion transmembrane transporter activity) OS=Anopheles darlingi GN=AND_07278 PE=4 SV=1Length=153	Score = 99.4 bits (246), Expect = 2e-019		copper ion transmembrane transporter activity	integral to membrane	emb|AM093890.1| AM093890 Lutzomyia longipalpis Jacobina whole fly Lutzomyia longipalpis cDNA clone NSFM-89a05, mRNA sequence.Length=1250	Score = 702 bits (380), Expect = 0.0
Contig1520	F1UMNMG01A7BAZ	Length=477	tr|B0W5T7|B0W5T7_CULQU E3 ubiquitin-protein ligase HECTD1 (ubiquitin-protein ligase activity; metal ion binding) OS=Culex quinquefasciatus GN=CpipJ_CPIJ002462 PE=4 SV=1Length=2813	Score = 158 bits (400), Expect = 3e-037		ubiquitin-protein ligase activity; metal ion binding	intracellular	No Hit
Contig16168	F1UMNMG01A7GLK	Length=474	tr|B5DKT1|B5DKT1_DROPS GA22778 (Znf_RING; zinc ion binding; E3 ubiquitin-protein ligase activity is intrinsic to the RING domain of c-Cbl and is likely to be a general function of this domain; Various RING fingers exhibit binding activity towards E2 ubiquitin-conjugating enzymes) OS=Drosophila pseudoobscura pseudoobscura GN=GA22778 PE=4 SV=1Length=1611	Score = 94.4 bits (233), Expect = 8e-018		zinc ion binding		emb|AM098160.1| AM098160 Lutzomyia longipalpis Jacobina whole fly Lutzomyia longipalpis cDNA clone NSFM-11f05, mRNA sequence.Length=1097	Score = 224 bits (121), Expect = 4e-055
Contig17546	F1UMNMG01AZIHV	Length=485	tr|Q7PMK0|Q7PMK0_ANOGA AGAP010767-PA (Fragment) (intracellular signal transduction; regulation of Rho protein signal transduction; termination of G-protein coupled receptor signaling pathway; The members of the Rho GTPase family have been shown to regulate many aspects of intracellular actin dynamics, have been described as "molecular switches" and play a role in cell proliferation, apoptosis, ge…	Score = 67.0 bits (162), Expect = 1e-009	intracellular signal transduction; regulation of Rho protein signal transduction; termination of G-protein coupled receptor signaling pathway	Rho guanyl-nucleotide exchange factor activity; metal ion binding; phospholipid binding	cytoplasm	No Hit
Contig17549	F1UMNMG01BM7KW	Length=504	tr|Q1HQV5|Q1HQV5_AEDAE Mitochondrial aldehyde dehydrogenase (oxidoreductase activity, acting on the aldehyde or oxo group of donors, NAD or NADP as acceptor) OS=Aedes aegypti PE=2 SV=1Length=516	Score = 182 bits (463), Expect(2) = 1e-057		oxidoreductase activity, acting on the aldehyde or oxo group of donors, NAD or NADP as acceptor		emb|AM100213.1| AM100213 Lutzomyia longipalpis Jacobina whole fly Lutzomyia longipalpis cDNA clone NSFM-149b07, mRNA sequence.Length=1181	Score = 760 bits (411), Expect = 0.0
Contig17575	F1UMNMG01APIG7	Length=479	tr|D3TLF2|D3TLF2_GLOMM Adenosine monophosphate deaminase OS=Glossina morsitans morsitans PE=2 SV=1Length=774	Score = 232 bits (592), Expect(2) = 5e-067	IMP biosynthetic process	AMP deaminase activity		emb|AM106748.1| AM106748 Lutzomyia longipalpis Jacobina whole fly Lutzomyia longipalpis cDNA clone NSFM-62f06, mRNA sequence.Length=1303	Score = 706 bits (382), Expect = 0.0
Contig17575	F1UMNMG01BJ9O8	Length=485	tr|D3TLF2|D3TLF2_GLOMM Adenosine monophosphate deaminase OS=Glossina morsitans morsitans PE=2 SV=1Length=774	Score = 214 bits (545), Expect(2) = 1e-063	IMP biosynthetic process	AMP deaminase activity		emb|AM106748.1| AM106748 Lutzomyia longipalpis Jacobina whole fly Lutzomyia longipalpis cDNA clone NSFM-62f06, mRNA sequence.Length=1303	Score = 710 bits (384), Expect = 0.0
Contig17575	F1UMNMG01A44AL	Length=482	tr|D3TLF2|D3TLF2_GLOMM Adenosine monophosphate deaminase OS=Glossina morsitans morsitans PE=2 SV=1Length=774	Score = 272 bits (695), Expect = 2e-071	IMP biosynthetic process	AMP deaminase activity		emb|AM106748.1| AM106748 Lutzomyia longipalpis Jacobina whole fly Lutzomyia longipalpis cDNA clone NSFM-62f06, mRNA sequence.Length=1303	Score = 715 bits (387), Expect = 0.0
Contig17575	F1UMNMG01AU3QN	Length=483	tr|D3TLF2|D3TLF2_GLOMM Adenosine monophosphate deaminase OS=Glossina morsitans morsitans PE=2 SV=1Length=774	Score = 214 bits (545), Expect(2) = 2e-064	IMP biosynthetic process	AMP deaminase activity		emb|AM106748.1| AM106748 Lutzomyia longipalpis Jacobina whole fly Lutzomyia longipalpis cDNA clone NSFM-62f06, mRNA sequence.Length=1303	Score = 706 bits (382), Expect = 0.0
Contig17585	F1UMNMG01CG0I7	Length=498	tr|Q7PS03|Q7PS03_ANOGA AGAP000579-PA (cholesterol transport) OS=Anopheles gambiae GN=AgaP_AGAP000579 PE=4 SV=5Length=1279	Score = 53.5 bits (127), Expect(2) = 6e-015	cholesterol transport	hedgehog receptor activity	integral to membrane	No Hit
Contig17585	F1UMNMG01BLJ79	Length=495	tr|Q7PS03|Q7PS03_ANOGA AGAP000579-PA (cholesterol transport) OS=Anopheles gambiae GN=AgaP_AGAP000579 PE=4 SV=5Length=1279	Score = 53.5 bits (127), Expect(2) = 1e-010	cholesterol transport	hedgehog receptor activity	integral to membrane	No Hit
Contig17984	F1UMNMG01B00RQ	Length=471	tr|A7UU65|A7UU65_ANOGA AGAP006260-PD (Z band alternatively spliced PDZ-motif protein 66, isoform I; mesoderm development) OS=Anopheles gambiae GN=AGAP006260 PE=4 SV=1Length=243	Score = 106 bits (265), Expect = 2e-021				emb|AM107770.1| AM107770 Lutzomyia longipalpis Jacobina whole fly Lutzomyia longipalpis cDNA clone NSFM-85h05, mRNA sequence.Length=1196	Score = 606 bits (328), Expect = 3e-170
Contig17984	F1UMNMG01CHPZU	Length=268	tr|Q86BH6|Q86BH6_DROME Z band alternatively spliced PDZ-motif protein 66, isoform I (mesoderm development) OS=Drosophila melanogaster GN=Zasp66 PE=2 SV=1Length=215	Score = 73.2 bits (178), Expect = 2e-011	mesoderm development		Z disc	emb|AM107766.1| AM107766 Lutzomyia longipalpis Jacobina whole fly Lutzomyia longipalpis cDNA clone NSFM-153e11, mRNA sequence.Length=1473	Score = 267 bits (144), Expect = 3e-068
Contig1916	F1UMNMG01B83GT	Length=512	tr|F1NGA2|F1NGA2_CHICK ATP synthase subunit alpha (Fragment) (ATP hydrolysis and synthesis coupled proton transport) OS=Gallus gallus GN=ATP5A1 PE=3 SV=1Length=555	Score = 263 bits (671), Expect(2) = 1e-068	ATP hydrolysis coupled proton transport; ATP synthesis coupled proton transport	proton-transporting ATPase activity, rotational mechanism; hydrogen ion transporting ATP synthase activity, rotational mechanism; ATP binding	proton-transporting ATP synthase complex, catalytic core F(1)	emb|AM089288.1| AM089288 Lutzomyia longipalpis Jacobina whole fly Lutzomyia longipalpis cDNA clone NSFM-05b11, mRNA sequence.Length=1177	Score = 852 bits (461), Expect = 0.0
Contig19908	F1UMNMG01B0XAO	Length=533	tr|Q17F89|Q17F89_AEDAE Putative uncharacterized protein (Fragment) (Zinc finger, C2H2-like; This entry represents the classical C2H2 zinc finger domain; Zinc finger (Znf) domains are now recognised to bind DNA, RNA, protein and/or lipid substrates) OS=Aedes aegypti GN=AAEL003489 PE=4 SV=1Length=781	Score = 54.3 bits (129), Expect(2) = 4e-007		zinc ion binding	intracellular	emb|AM106700.1| AM106700 Lutzomyia longipalpis Jacobina whole fly Lutzomyia longipalpis cDNA clone NSFM-95f09, mRNA sequence.Length=1281	Score = 209 bits (113), Expect = 1e-050
Contig20905	F1UMNMG01A7K9H	Length=502	tr|Q0IFH5|Q0IFH5_AEDAE Phd finger protein (Zinc_finger_PHD-type_CS; this entry represents the PHD (homeodomain) zinc finger domain, which is a C4HC3 zinc-finger-like motif found in nuclear proteins thought to be involved in chromatin-mediated transcriptional regulation) OS=Aedes aegypti GN=AAEL004834 PE=4 SV=1Length=2274	Score = 73.9 bits (180), Expect = 1e-011		zinc ion binding		No Hit
Contig21255	F1UMNMG01CD8GK	Length=511	tr|Q16MH2|Q16MH2_AEDAE Putative uncharacterized protein (Anoctamin; This family contains the anoctamin/TMEM16 proteins which are thought to be calcium-dependent chloride channel) OS=Aedes aegypti GN=AAEL012293 PE=4 SV=1Length=863	Score = 64.7 bits (156), Expect(4) = 1e-026				gb|ES348556.1| PPINFM-P7-E11 P. papatasi adult female blood fed with L. major midgut library Phlebotomus papatasi cDNA, mRNA sequence.Length=600	Score = 353 bits (191), Expect = 5e-094
Contig21297	F1UMNMG01BFZX6	Length=538	tr|G7K0E9|G7K0E9_MEDTR Cytochrome P450 likeTBP OS=Medicago truncatula GN=MTR_5g051190 PE=4 SV=1Length=656	Score = 82.4 bits (202), Expect = 3e-014				emb|FP595913.1| FP595913 Hirudo medicinalis normalized library Hirudo medicinalis cDNA, mRNA sequence.Length=540	Score = 327 bits (177), Expect = 3e-086
Contig21417	F1UMNMG01BQBVC	Length=547	tr|E3WVT8|E3WVT8_ANODA Putative uncharacterized protein (malate dehydrogenase 2; cellular carbohydrate metabolic process) OS=Anopheles darlingi GN=AND_07877 PE=3 SV=1Length=1337	Score = 142 bits (357), Expect(2) = 2e-038	carbohydrate metabolic process; malate metabolic process	L-malate dehydrogenase activity; nucleic acid binding; nucleotide binding; zinc ion binding	intracellular	emb|AM100366.1| AM100366 Lutzomyia longipalpis Jacobina whole fly Lutzomyia longipalpis cDNA clone NSFM-164d01, mRNA sequence.Length=1369	Score = 887 bits (480), Expect = 0.0
Contig21417	F1UMNMG01AONX6	Length=546	tr|Q7PYE7|Q7PYE7_ANOGA AGAP001903-PA (Mitochondrial malate dehydrogenase 2; cellular carbohydrate metabolic process) OS=Anopheles gambiae GN=AGAP001903 PE=3 SV=4Length=337	Score = 182 bits (463), Expect = 2e-044	cellular carbohydrate metabolic process; malate metabolic process	L-malate dehydrogenase activity; nucleotide binding		emb|AM100366.1| AM100366 Lutzomyia longipalpis Jacobina whole fly Lutzomyia longipalpis cDNA clone NSFM-164d01, mRNA sequence.Length=1369	Score = 872 bits (472), Expect = 0.0
Contig22934	F1UMNMG01BJSE2	Length=458	tr|E3WN74|E3WN74_ANODA Putative uncharacterized protein (SH3 domain-binding protein 5 (SH3BP5); the SH3 domain-binding protein inhibits the auto and transphophorylation of BTK and acts as a negative regulator of BTK-related signalling in B cells; is involved in JNK cascade, a cascade of protein kinase activities, culminating in the phosphorylation and activation of a member of the JUN kinase subf…	Score = 84.0 bits (206), Expect(2) = 1e-024				No Hit
Contig23288	F1UMNMG01BL95V	Length=469	tr|Q16T27|Q16T27_AEDAE Beclin (autophagy, the process in which cells digest parts of their own cytoplasm; allows for both recycling of macromolecular constituents under conditions of cellular stress and remodeling the intracellular structure for cell differentiation) OS=Aedes aegypti GN=AAEL010427 PE=4 SV=1Length=426	Score = 169 bits (427), Expect = 3e-040	autophagy			emb|AM092621.1| AM092621 Lutzomyia longipalpis Jacobina whole fly Lutzomyia longipalpis cDNA clone NSFM-135a04, mRNA sequence.Length=1356	Score = 673 bits (364), Expect = 0.0
Contig23521	F1UMNMG01BUNQJ	Length=506	tr|Q16KZ7|Q16KZ7_AEDAE Transcription factor E2f, putative (DE2F) (transcription, DNA-dependent) OS=Aedes aegypti GN=AAEL012817 PE=3 SV=1Length=662	Score = 68.2 bits (165), Expect = 6e-010	transcription, DNA-dependent	DNA binding; sequence-specific DNA binding transcription factor activity	transcription factor complex	emb|AM095029.1| AM095029 Lutzomyia longipalpis Jacobina whole fly Lutzomyia longipalpis cDNA clone NSFM-35h06, mRNA sequence.Length=1235	Score = 492 bits (266), Expect = 1e-135
Contig24258	F1UMNMG01BZGBR	Length=490	tr|B0W015|B0W015_CULQU Serine-type protease inhibitor (proteolysis) OS=Culex quinquefasciatus GN=CpipJ_CPIJ000379 PE=4 SV=1Length=1032	Score = 74.3 bits (181), Expect = 9e-012	proteolysis	peptidase activity		No Hit
Contig24422	F1UMNMG01AZIBO	Length=487	tr|B0W404|B0W404_CULQU Chorion peroxidase (response to oxidative stress) OS=Culex quinquefasciatus GN=CpipJ_CPIJ001764 PE=4 SV=1Length=685	Score = 160 bits (404), Expect = 1e-037	response to oxidative stress	heme binding; peroxidase activity		emb|AM104644.1| AM104644 Lutzomyia longipalpis Jacobina whole fly Lutzomyia longipalpis cDNA clone NSFM-65e06, mRNA sequence.Length=1281	Score = 737 bits (399), Expect = 0.0
Contig25566	F1UMNMG01B4WQ2	Length=558	tr|B4PJH9|B4PJH9_DROYA Dihydrolipoyl dehydrogenase, belongs to the class-I pyridine nucleotide-disulfide oxidoreductase family (cell redox homeostasis) OS=Drosophila yakuba GN=GE19931 PE=3 SV=1Length=504	Score = 216 bits (551), Expect = 1e-054	cell redox homeostasis	dihydrolipoyl dehydrogenase activity; flavin adenine dinucleotide binding	cytoplasm	emb|AM103935.1| AM103935 Lutzomyia longipalpis Jacobina whole fly Lutzomyia longipalpis cDNA clone NSFM-57h11, mRNA sequence.Length=1201	Score = 900 bits (487), Expect = 0.0
Contig26544	F1UMNMG01BENHZ	Length=410	tr|Q16YC2|Q16YC2_AEDAE Tep3 (negative regulation of endopeptidase activity) OS=Aedes aegypti GN=AAEL008607 PE=4 SV=1Length=1451	Score = 123 bits (309), Expect = 1e-026	negative regulation of endopeptidase activity	endopeptidase inhibitor activity	extracellular space	emb|AM104592.1| AM104592 Lutzomyia longipalpis Jacobina whole fly Lutzomyia longipalpis cDNA clone NSFM-143h01, mRNA sequence.Length=1223	Score = 586 bits (317), Expect = 3e-164
Contig26544	F1UMNMG01BEYRU	Length=501	tr|Q16YC2|Q16YC2_AEDAE Tep3 (negative regulation of endopeptidase activity) OS=Aedes aegypti GN=AAEL008607 PE=4 SV=1Length=1451	Score = 152 bits (384), Expect(2) = 2e-044	negative regulation of endopeptidase activity	endopeptidase inhibitor activity	extracellular space	emb|AM104594.1| AM104594 Lutzomyia longipalpis Jacobina whole fly Lutzomyia longipalpis cDNA clone NSFM-79f04, mRNA sequence.Length=1408	Score = 802 bits (434), Expect = 0.0
Contig26611	F1UMNMG01APBDT	Length=500	tr|Q7QHI8|Q7QHI8_ANOGA AGAP011201-PA (Fragment) (TLC-dom; Transmembrane helix; Proteins containing this domain may possess multiple functions such as lipid trafficking, metabolism, or sensing) OS=Anopheles gambiae GN=AGAP011201 PE=4 SV=4Length=113	Score = 65.5 bits (158), Expect(2) = 4e-021				gb|EW993169.1| LJGDIM22_F05 Adult female Lutzomyia longipalpis midgut library post blood meal digestion containing Leishmania chagasi Lutzomyia longipalpis cDNA, mRNA sequence.Length=1045	Score = 795 bits (430), Expect = 0.0
Contig26764	F1UMNMG01A04BJ	Length=538	tr|D3TMM8|D3TMM8_GLOMM Ras suppressor protein (This gene encodes a protein that is involved in the Ras signal transduction pathway, growth inhibition, and nerve-growth factor induced differentiation processes) OS=Glossina morsitans morsitans PE=2 SV=1Length=289	Score = 182 bits (463), Expect(3) = 3e-067				emb|AM093599.1| AM093599 Lutzomyia longipalpis Jacobina whole fly Lutzomyia longipalpis cDNA clone NSFM-01d12, mRNA sequence.Length=1022	Score = 850 bits (460), Expect = 0.0
Contig26867	F1UMNMG01B1OLX	Length=495	tr|G8FU55|G8FU55_APIME Hunchback (Znf_C2H2/integrase_DNA-bd; this entry represents the C2H2-type zinc finger domain [11], as well as the DNA-binding domain of certain integrases) OS=Apis mellifera GN=hb PE=2 SV=1Length=646	Score = 180 bits (456), Expect = 1e-043		nucleic acid binding; zinc ion binding	intracellular	emb|AM090886.1| AM090886 Lutzomyia longipalpis Jacobina whole fly Lutzomyia longipalpis cDNA clone NSFM-21c03, mRNA sequence.Length=1260	Score = 582 bits (315), Expect = 5e-163
Contig27281	F1UMNMG01B7VQJ	Length=501	tr|Q7Q8C2|Q7Q8C2_ANOGA AGAP008698-PA (Fragment) (Chromodomain-helicase-DNA-binding protein 1; ATP-dependent helicase activity, DNA binding, ATP binding) OS=Anopheles gambiae GN=AGAP008698 PE=4 SV=4Length=2083	Score = 138 bits (348), Expect = 4e-031		ATP binding; ATP-dependent helicase activity; DNA binding	nucleus	No Hit
Contig27781	F1UMNMG01ANXVR	Length=340	tr|Q16KT4|Q16KT4_AEDAE Putative uncharacterized protein (COPII vesicle coating; the addition of COPII proteins and adaptor proteins to ER membranes during the formation of transport vesicles, forming a vesicle coat) OS=Aedes aegypti GN=AAEL012880 PE=4 SV=1Length=802	Score = 104 bits (260), Expect = 6e-021	COPII vesicle coating			No Hit
Contig28177	F1UMNMG01BS7X2	Length=542	tr|Q7PVH2|Q7PVH2_ANOGA AGAP009278-PA (Phosphorylase b kinase beta; glycogen metabolic process) OS=Anopheles gambiae GN=AGAP009278 PE=4 SV=4Length=1065	Score = 125 bits (314), Expect = 4e-027	glycogen metabolic process	hydrolase activity, hydrolyzing O-glycosyl compounds		emb|AM098160.1| AM098160 Lutzomyia longipalpis Jacobina whole fly Lutzomyia longipalpis cDNA clone NSFM-11f05, mRNA sequence.Length=1097	Score = 316 bits (171), Expect = 7e-083
Contig28541	F1UMNMG01BM2MQ	Length=546	tr|B3N0J2|B3N0J2_DROAN GF21709 (Microsomal glutathione S-transferase-like, isoform B; MAPEG-like_dom; This domain is found in a widespread superfamily known as MAPEG (Membrane Associated Proteins in Eicosanoid and Glutathione metabolism) OS=Drosophila ananassae GN=GF21709 PE=4 SV=1Length=195	Score = 109 bits (272), Expect = 3e-022				gb|EW990920.1| LJGFIS32_F12 Adult female Lutzomyia longipalpis midgut library blood fed containing Leishmania chagasi Lutzomyia longipalpis cDNA, mRNA sequence.Length=600	Score = 545 bits (295), Expect = 8e-152
Contig28581	F1UMNMG01CHSBJ	Length=444	tr|Q17F22|Q17F22_AEDAE Purine biosynthesis protein 6, pur6 ('de novo' IMP biosynthetic process) OS=Aedes aegypti GN=AAEL003606 PE=4 SV=1Length=427	Score = 187 bits (475), Expect = 7e-046	de novo' IMP biosynthetic process	5-(carboxyamino)imidazole ribonucleotide mutase activity; ATP binding; phosphoribosylaminoimidazolesuccinocarboxamide synthase activity		emb|AM103237.1| AM103237 Lutzomyia longipalpis Jacobina whole fly Lutzomyia longipalpis cDNA clone NSFM-118c03, mRNA sequence.Length=1400	Score = 623 bits (337), Expect = 3e-175
Contig28677	F1UMNMG01BDORY	Length=509	tr|B0WEB3|B0WEB3_CULQU Fatty acid synthase S-acetyltransferase (biosynthetic process) OS=Culex quinquefasciatus GN=CpipJ_CPIJ005595 PE=4 SV=1Length=2419	Score = 74.7 bits (182), Expect(2) = 1e-014	biosynthetic process	3-hydroxypalmitoyl-[acyl-carrier-protein] dehydratase activity; 3-oxoacyl-[acyl-carrier-protein] synthase activity; [acyl-carrier-protein] S-acetyltransferase activity; nucleotide binding; zinc ion binding		emb|AM105896.1| AM105896 Lutzomyia longipalpis Jacobina whole fly Lutzomyia longipalpis cDNA clone NSFM-106f09, mRNA sequence.Length=1346	Score = 614 bits (332), Expect = 2e-172
Contig28934	F1UMNMG01CBR3L	Length=488	tr|Q16KW5|Q16KW5_AEDAE Forkhead box, sub-group O, putative (transcription factor) OS=Aedes aegypti GN=AAEL012847 PE=4 SV=1Length=403	Score = 196 bits (497), Expect = 2e-048				No Hit
Contig29342	F1UMNMG01A75GZ	Length=331	tr|B0W745|B0W745_CULQU Retinoid-inducible serine carboxypeptidase (proteolysis) OS=Culex quinquefasciatus GN=CpipJ_CPIJ002911 PE=4 SV=1Length=446	Score = 134 bits (337), Expect = 7e-030	proteolysis	serine-type carboxypeptidase activity		emb|AM098344.1| AM098344 Lutzomyia longipalpis Jacobina whole fly Lutzomyia longipalpis cDNA clone NSFM-83a06, mRNA sequence.Length=1156	Score = 424 bits (229), Expect = 2e-115
Contig30690	F1UMNMG01B6SRG	Length=504	tr|B4MYN1|B4MYN1_DROWI Elongation factor 1-alpha (Protein biosynthesis) OS=Drosophila willistoni GN=GK22048 PE=3 SV=1Length=463	Score = 195 bits (495), Expect = 3e-048	GTP catabolic process	GTP binding; GTPase activity; translation elongation factor activity	cytoplasm	emb|AM097515.1| AM097515 Lutzomyia longipalpis Jacobina whole fly Lutzomyia longipalpis cDNA clone NSFM-98c09, mRNA sequence.Length=956	Score = 843 bits (456), Expect = 0.0
Contig31004	F1UMNMG01BUSUW	Length=417	tr|Q171S2|Q171S2_AEDAE Vacuolar protein sorting-associated protein (Vps13d) (Fragment); Proteins in this entry may play a role in the control of protein cycling through the trans-Golgi network OS=Aedes aegypti GN=AAEL007551 PE=4 SV=1Length=3926	Score = 122 bits (307), Expect = 2e-026	protein localization			No Hit
Contig32134	F1UMNMG01CDEYK	Length=497	tr|B0W4H2|B0W4H2_CULQU Myosin-VIIa OS=Culex quinquefasciatus GN=CpipJ_CPIJ001741 PE=4 SV=1Length=2076	Score = 137 bits (345), Expect(2) = 5e-059		ATP binding; motor activity	myosin complex	No Hit
Contig32328	F1UMNMG01AW7VE	Length=389	tr|Q9BIJ1|Q9BIJ1_DROVI Actin E2 OS=Drosophila virilis GN=ActE2 PE=3 SV=1Length=376	Score = 171 bits (434), Expect = 4e-041		ATP binding	cytoplasm; cytoskeleton	emb|AM103564.1| AM103564 Lutzomyia longipalpis Jacobina whole fly Lutzomyia longipalpis cDNA clone NSFM-27g09, mRNA sequence.Length=1292	Score = 555 bits (300), Expect = 9e-155
Contig32328	F1UMNMG01BLL1I	Length=453	tr|Q9BIJ1|Q9BIJ1_DROVI Actin E2 OS=Drosophila virilis GN=ActE2 PE=3 SV=1Length=376	Score = 171 bits (434), Expect = 4e-041		ATP binding	cytoplasm; cytoskeleton	emb|AM103563.1| AM103563 Lutzomyia longipalpis Jacobina whole fly Lutzomyia longipalpis cDNA clone SFM-04a10, mRNA sequence.Length=1266	Score = 507 bits (274), Expect = 3e-140
Contig32940	F1UMNMG01B6WN7	Length=472	tr|E1JHJ5|E1JHJ5_DROME Myosin heavy chain, isoform P OS=Drosophila melanogaster GN=Mhc PE=4 SV=1Length=1949	Score = 219 bits (559), Expect = 1e-055	ATP catabolic process	ATP binding; ATPase activity; motor activity	myosin filament	emb|AM109365.1| AM109365 Lutzomyia longipalpis Jacobina whole fly Lutzomyia longipalpis cDNA clone NSFM-35c06, mRNA sequence.Length=1239	Score = 815 bits (441), Expect = 0.0
Contig32976	F1UMNMG01BTZ01	Length=524	tr|Q16UP6|Q16UP6_AEDAE Putative uncharacterized protein (Fragment) (Dpr7, isoform D; sensory perception of chemical stimulus) OS=Aedes aegypti GN=AAEL009841 PE=4 SV=1Length=200	Score = 117 bits (292), Expect = 1e-024				emb|AM090009.1| AM090009 Lutzomyia longipalpis Jacobina whole fly Lutzomyia longipalpis cDNA clone NSFM-20g09, mRNA sequence.Length=1209	Score = 702 bits (380), Expect = 0.0
Contig33170	F1UMNMG01COLNC	Length=508	tr|E2AL58|E2AL58_CAMFO Centrosomal protein of 164 kDa; Rsp5 or WWP domain; protein binding; It is frequently associated with other domains typical for proteins in signal transduction processes OS=Camponotus floridanus GN=EAG_04638 PE=4 SV=1Length=1335	Score = 63.9 bits (154), Expect = 1e-008				No Hit
Contig33170	F1UMNMG01ANLFE	Length=505	tr|B4L5G9|B4L5G9_DROMO GI21515 (WW_Rsp5_WWP; protein binding; It is frequently associated with other domains typical for proteins in signal transduction processes) OS=Drosophila mojavensis GN=GI21515 PE=4 SV=1Length=1483	Score = 58.5 bits (140), Expect = 5e-007				No Hit
Contig33295	F1UMNMG01B7AXM	Length=511	tr|B4JYB4|B4JYB4_DROGR GH14264 (Serine/threonine-protein phosphatase 4 regulatory subunit) OS=Drosophila grimshawi GN=GH14264 PE=4 SV=1Length=1040	Score = 114 bits (286), Expect(2) = 9e-046				gb|EX211972.1| ALYTINFA04F04 Lutzomyia longipalpis Infected Lutzomyia longipalpis cDNA 5', mRNA sequence.Length=659	Score = 819 bits (443), Expect = 0.0
Contig33875	F1UMNMG01AXQRI	Length=486	tr|Q17BQ6|Q17BQ6_AEDAE Cyclin g OS=Aedes aegypti GN=AAEL004865 PE=3 SV=1Length=476	Score = 99.0 bits (245), Expect(2) = 2e-035				emb|AM092776.1| AM092776 Lutzomyia longipalpis Jacobina whole fly Lutzomyia longipalpis cDNA clone NSFM-43a02, mRNA sequence.Length=1110	Score = 715 bits (387), Expect = 0.0
Contig34912	F1UMNMG01BKZGS	Length=564	tr|Q94977|Q94977_LUCCU PC2-like prohormone convertase (Belongs to the peptidase S8 family; proteolysis; serine-type endopeptidase activity) OS=Lucilia cuprina PE=2 SV=1Length=675	Score = 72.4 bits (176), Expect = 4e-011	proteolysis	serine-type endopeptidase activity		No Hit
Contig34935	F1UMNMG01BZT0I	Length=496	tr|H9HCC6|H9HCC6_ATTCE Uncharacterized protein (Fragment) (protein serine/threonine kinase activity; ATP binding) OS=Atta cephalotes PE=4 SV=1Length=705	Score = 214 bits (546), Expect = 4e-054				No Hit
Contig35571	F1UMNMG01BH4H0	Length=454	tr|H9HCJ2|H9HCJ2_ATTCE Uncharacterized protein (Nesprin-1 [nuclear envelope spectrin repeat]; Actin-binding) OS=Atta cephalotes PE=4 SV=1Length=7090	Score = 65.9 bits (159), Expect(2) = 3e-018				No Hit
Contig35572	F1UMNMG01BCBB9	Length=465	tr|H9HCJ2|H9HCJ2_ATTCE Uncharacterized protein (Nesprin-1 [nuclear envelope spectrin repeat]; Actin-binding) OS=Atta cephalotes PE=4 SV=1Length=7090	Score = 195 bits (495), Expect = 3e-048				No Hit
Contig3834	F1UMNMG01AY8DM	Length=499	tr|Q178E8|Q178E8_AEDAE ATP-binding cassette transporter OS=Aedes aegypti GN=AAEL005929 PE=3 SV=1Length=1413	Score = 133 bits (335), Expect(3) = 4e-043	ATP catabolic process	ATP binding; ATPase activity, coupled to transmembrane movement of substances	integral to membrane	No Hit
Contig3896	F1UMNMG01CNPWR	Length=467	tr|B4N5X0|B4N5X0_DROWI Belongs to the sodium:neurotransmitter symporter (SNF) family; OS=Drosophila willistoni GN=GK17955 PE=3 SV=1Length=750	Score = 183 bits (465), Expect(2) = 8e-051		neurotransmitter:sodium symporter activity	integral to membrane	No Hit
Contig444	F1UMNMG01BUSKD	Length=517	tr|D0UR85|D0UR85_ISCVE Glycogen synthase (Fragment) OS=Ischnura verticalis PE=2 SV=1Length=303	Score = 202 bits (514), Expect(2) = 7e-072	glycogen biosynthetic process	glycogen (starch) synthase activity		emb|AM105247.1| AM105247 Lutzomyia longipalpis Jacobina whole fly Lutzomyia longipalpis cDNA clone NSFM-116b09, mRNA sequence.Length=1285	Score = 483 bits (261), Expect = 6e-133
Contig5109	F1UMNMG01COD2A	Length=535	tr|B4M8E2|B4M8E2_DROVI GJ16794 (zinc ion binding) OS=Drosophila virilis GN=GJ16794 PE=4 SV=1Length=5248	Score = 83.6 bits (205), Expect(3) = 9e-021		zinc ion binding		No Hit
Contig5231	F1UMNMG01CHFR5	Length=516	tr|Q16UB8|Q16UB8_AEDAE Putative uncharacterized protein (Apolipophorins; lipid transporter activity) OS=Aedes aegypti GN=AAEL009955 PE=4 SV=1Length=3321	Score = 181 bits (460), Expect = 4e-044		lipid transporter activity		emb|AM103887.1| AM103887 Lutzomyia longipalpis Jacobina whole fly Lutzomyia longipalpis cDNA clone NSFM-17b10, mRNA sequence.Length=1273	Score = 490 bits (265), Expect = 3e-135
Contig5231	F1UMNMG01B73K8	Length=515	tr|Q16UB8|Q16UB8_AEDAE Putative uncharacterized protein (Apolipophorins; lipid transporter activity) OS=Aedes aegypti GN=AAEL009955 PE=4 SV=1Length=3321	Score = 101 bits (252), Expect(2) = 9e-039		lipid transporter activity		emb|AM103887.1| AM103887 Lutzomyia longipalpis Jacobina whole fly Lutzomyia longipalpis cDNA clone NSFM-17b10, mRNA sequence.Length=1273	Score = 486 bits (263), Expect = 5e-134
Contig5826	F1UMNMG01CEZMF	Length=478	tr|B0WNG3|B0WNG3_CULQU Oligosaccharyl transferase (N-linked glycosylation is a ubiquitous protein modification, and is essential for viability in eukaryotic cells) OS=Culex quinquefasciatus GN=CpipJ_CPIJ008679 PE=4 SV=1Length=777	Score = 220 bits (560), Expect = 1e-055	protein glycosylation	oligosaccharyl transferase activity	membrane	No Hit
Contig5826	F1UMNMG01BC99S	Length=483	tr|B0WNG3|B0WNG3_CULQU Oligosaccharyl transferase (N-linked glycosylation is a ubiquitous protein modification, and is essential for viability in eukaryotic cells) OS=Culex quinquefasciatus GN=CpipJ_CPIJ008679 PE=4 SV=1Length=777	Score = 161 bits (407), Expect(2) = 3e-050	protein glycosylation	oligosaccharyl transferase activity	membrane	No Hit
Contig6260	F1UMNMG01ATCQS	Length=561	tr|E0W1Z3|E0W1Z3_PEDHC Breast cancer type 2 susceptibility protein brca2, putative; double-strand break repair via homologous recombination; regulation of S phase of mitotic cell cycle OS=Pediculus humanus subsp. corporis GN=Phum_PHUM580760 PE=4 SV=1Length=1405	Score = 129 bits (324), Expect = 3e-028	double-strand break repair via homologous recombination; regulation of S phase of mitotic cell cycle	single-stranded DNA binding	nucleus	No Hit
Contig6260	F1UMNMG01CK70B	Length=550	tr|E0W1Z3|E0W1Z3_PEDHC Breast cancer type 2 susceptibility protein brca2, putative; double-strand break repair via homologous recombination; regulation of S phase of mitotic cell cycle OS=Pediculus humanus subsp. corporis GN=Phum_PHUM580760 PE=4 SV=1Length=1405	Score = 118 bits (295), Expect = 6e-025	double-strand break repair via homologous recombination; regulation of S phase of mitotic cell cycle	single-stranded DNA binding	nucleus	No Hit
Contig6552	F1UMNMG01CNGQ6	Length=575	tr|Q291L7|Q291L7_DROPS GA21076 (CWC16; eukaryotic proteins with undetermined function belonging to the CWC16 family) OS=Drosophila pseudoobscura pseudoobscura GN=GA21076 PE=4 SV=2Length=319	Score = 130 bits (326), Expect = 2e-028				emb|AM105291.1| AM105291 Lutzomyia longipalpis Jacobina whole fly Lutzomyia longipalpis cDNA clone NSFM-128a04, mRNA sequence.Length=1321	Score = 313 bits (169), Expect = 9e-082
Contig7838	F1UMNMG01BOQ4E	Length=527	tr|E3WM83|E3WM83_ANODA Putative uncharacterized protein (F-box only protein; protein ubiquitination) OS=Anopheles darlingi GN=AND_02054 PE=3 SV=1Length=1991	Score = 195 bits (495), Expect(2) = 4e-066	protein ubiquitination	ubiquitin-protein ligase activity; zinc ion binding		gb|GW816392.1| PPRGFL_P4_D10 PPRGF Phlebotomus perniciosus cDNA, mRNA sequence.Length=977	Score = 531 bits (287), Expect = 2e-147
Contig8325	F1UMNMG01CH1SP	Length=481	tr|H9IEF4|H9IEF4_ATTCE Uncharacterized protein (Multidrug resistance protein 2 [Atp-binding cassette protein c]) OS=Atta cephalotes PE=4 SV=1Length=1587	Score = 106 bits (265), Expect = 2e-021	ATP catabolic process; chloride transport	ATP binding; ATPase activity, coupled to transmembrane movement of substances; chloride channel activity	integral to membrane	No Hit
Contig8506	F1UMNMG01CIMU6	Length=418	tr|B4P902|B4P902_DROYA Domino (ATP binding; DNA binding; helicase activity) OS=Drosophila yakuba GN=dom PE=4 SV=1Length=3195	Score = 102 bits (253), Expect = 4e-020		ATP binding; DNA binding; helicase activity		No Hit
Contig8996	F1UMNMG01A5DCE	Length=498	tr|B4LT21|B4LT21_DROVI GJ10873 (Seryl-tRNA synthetase; seryl-tRNA aminoacylation) OS=Drosophila virilis GN=GJ10873 PE=3 SV=1Length=501	Score = 132 bits (333), Expect(2) = 3e-049	seryl-tRNA aminoacylation	ATP binding; serine-tRNA ligase activity	cytoplasm	gb|EW993040.1| LJGDIM21_A05 Adult female Lutzomyia longipalpis midgut library post blood meal digestion containing Leishmania chagasi Lutzomyia longipalpis cDNA, mRNA sequence.Length=1086	Score = 791 bits (428), Expect = 0.0
Contig9179	F1UMNMG01CO03Z	Length=573	tr|B3MKY9|B3MKY9_DROAN GF14935 (Bicaudal C, isoform B; Contains 2 KH domains; the KH domain binds RNA, and can function in RNA recognition) OS=Drosophila ananassae GN=GF14935 PE=4 SV=1Length=938	Score = 77.8 bits (190), Expect = 1e-012	ovarian follicle cell migration; negative regulation of oskar mRNA translation; microtubule cytoskeleton organization; actin cytoskeleton organization; mitosis;	mRNA binding; protein binding;		No Hit
Contig9695	F1UMNMG01AXEGR	Length=489	tr|B4Q7Y4|B4Q7Y4_DROSI GD21867 (Bicaudal-D_microtubule-assoc; BicD proteins are involved in dynein-mediated minus end-directed transport from the Golgi apparatus to the endoplasmic reticulum) OS=Drosophila simulans GN=GD21867 PE=4 SV=1Length=784	Score = 122 bits (305), Expect(2) = 2e-031	germarium-derived oocyte fate determination; oocyte anterior/posterior axis specification; oocyte microtubule cytoskeleton polarization; germarium-derived female germ-line cyst formation; intracellular mRNA localization; oocyte nucleus migration during oocyte axis specification; mRNA transport;	mRNA binding; dynein binding;	Golgi apparatus;	No Hit
	F1UMNMG01BRP0O	Length=522	sp|P17336.2|CATA_DROME RecName: Full=Catalase (hydrogen peroxide catabolic process)	Score = 272 bits (695), Expect = 1e-87	determination of adult lifespan; hydrogen peroxide catabolic process; response to hydrogen peroxide	catalase activity	peroxisome	LJGFIM21_C02 Adult female Lutzomyia longipalpis midgut library blood fed containing Leishmania chagasi Lutzomyia longipalpis cDNA, mRNA sequence. Length=1078	Score = 931 bits (484), Expect = 0.0	gb|EU124624.1| Lutzomyia longipalpis putative catalase (Cat) mRNA, complete cds Length=1930	Score = 931 bits (484), Expect = 0.0
	F1UMNMG01APIYL	Length=352	sp|P00400.1|COX1_DROYA RecName: Full=Cytochrome c oxidase subunit 1	Score = 55.1 bits (131), Expect(3) = 1e-18	aerobic respiration; electron transport chain; oxidative phosphorylation	cytochrome-c oxidase activity;	integral to membrane; mitochondrial inner membrane	RAAPBAR005F08 BAR Lutzomyia longipalpis cDNA, mRNA sequence.	Score = 433 bits (225), Expect = 5e-118	gb|GU909504.1| Lutzomyia longipalpis voucher CAIMUS P573 cytochrome c oxidase subunit I (COI) gene, partial cds; mitochondrial Length=681	Score = 337 bits (175), Expect = 4e-89
	F1UMNMG01BTO68	Length=353	sp|P00400.1|COX1_DROYA RecName: Full=Cytochrome c oxidase subunit 1	Score = 48.1 bits (113), Expect(2) = 1e-07	aerobic respiration; electron transport chain; oxidative phosphorylation	cytochrome-c oxidase activity;	integral to membrane; mitochondrial inner membrane	RAAPBAR005F08 BAR Lutzomyia longipalpis cDNA, mRNA sequence.	Score = 275 bits (143), Expect = 1e-70	gb|GU909505.1| Lutzomyia longipalpis voucher CAIMUS P574 cytochrome c oxidase subunit I (COI) gene, partial cds; mitochondrial Length=681	Score = 181 bits (94), Expect = 3e-42
	F1UMNMG01BCRVO	Length=477	sp|Q8GTM0.1|DEF_NICAL RecName: Full=Flower-specific defensin/Q9XHE3 putative gamma-thionin precursor [Capsicum chinense] (defense response)	Score = 83.2 bits (204), Expect = 2e-19/Score = 130 bits (326), Expect = 7e-36	defense response to fungus; killing of cells of other organism		extracellular region; vacuole	KS14009G02 KS14 Capsicum annuum cDNA, mRNA sequence	Score = 779 bits (405), Expect = 0.0	gb|AF128239.1|AF128239 Capsicum chinense putative gamma-thionin precursor, mRNA, complete cds Length=559
	F1UMNMG01AZRFW	Length=551	sp|Q41963.2|TIP12_ARATH RecName: Full=Aquaporin TIP1-2; Belongs to the MIP/aquaporin family, transporter activity	Score = 144 bits (362), Expect(3) = 3e-46	defense response to bacterium; hydrogen peroxide transmembrane transport; water homeostasis	transporter activity	Golgi apparatus; endoplasmic reticulum; integral to membrane; plasma membrane; vacuolar membrane	0084656 Brassica napus Bud library Brassica napus cDNA, mRNA	Score = 837 bits (435), Expect = 0.0	dbj|D84669.1| Raphanus sativus mRNA for VM23, complete sequence Length=1054

## Sheet: Hits with blastx and blastn
Contig30589	F1UMNMG01BAU83	Length=708	No Hit		No Hit		emb|FP601882.1| FP601882 Hirudo medicinalis normalized library Hirudo medicinalis cDNA, mRNA sequence.Length=567	Score = 401 bits (217), Expect = 2e-108
Contig30589	F1UMNMG01CB4GO	Length=443	tr|B4N5L0|B4N5L0_DROWI GK12697 (monooxygenase activity) OS=Drosophila willistoni GN=GK12697 PE=4 SV=1Length=182	Score = 73.2 bits (178), Expect = 2e-011	No Hit		No Hit
Contig30589	F1UMNMG01BJ6VU	Length=467	tr|G7K0E5|G7K0E5_MEDTR Putative uncharacterized protein OS=Medicago truncatula GN=MTR_5g051150 PE=4 SV=1Length=2133	Score = 58.5 bits (140), Expect = 5e-007	No Hit		emb|FP601882.1| FP601882 Hirudo medicinalis normalized library Hirudo medicinalis cDNA, mRNA sequence.Length=567	Score = 383 bits (207), Expect = 5e-103
Contig30589	F1UMNMG01A0AZV	Length=341	No Hit		No Hit		emb|FP601882.1| FP601882 Hirudo medicinalis normalized library Hirudo medicinalis cDNA, mRNA sequence.Length=567	Score = 368 bits (199), Expect = 1e-098
Contig30589	F1UMNMG01CMZF9	Length=555	tr|B4N5L0|B4N5L0_DROWI GK12697 (monooxygenase activity) OS=Drosophila willistoni GN=GK12697 PE=4 SV=1Length=182	Score = 73.2 bits (178), Expect = 2e-011	No Hit		No Hit
Contig30589	F1UMNMG01A4VY2	Length=343	tr|B4N5L0|B4N5L0_DROWI GK12697 (monooxygenase activity) OS=Drosophila willistoni GN=GK12697 PE=4 SV=1Length=182	Score = 75.5 bits (184), Expect = 4e-012	gb|FJ040566.1| Phlebotomus duboscqi 28S ribosomal RNA gene, partial sequenceLength=3898	Score = 263 bits (142), Expect = 7e-067	emb|FP601882.1| FP601882 Hirudo medicinalis normalized library Hirudo medicinalis cDNA, mRNA sequence.Length=567	Score = 355 bits (192), Expect = 9e-095
Contig30589	F1UMNMG01CGXN9	Length=426	tr|B4N5L0|B4N5L0_DROWI GK12697 (monooxygenase activity) OS=Drosophila willistoni GN=GK12697 PE=4 SV=1Length=182	Score = 74.3 bits (181), Expect = 8e-012	No Hit		No Hit
Contig30589	F1UMNMG01B70ON	Length=523	tr|E9HZ40|E9HZ40_DAPPU Putative uncharacterized protein OS=Daphnia pulex GN=DAPPUDRAFT_119636 PE=4 SV=1Length=130	Score = 77.8 bits (190), Expect = 8e-013	gb|FJ040565.1| Lutzomyia longipalpis 28S ribosomal RNA gene, partial sequenceLength=2893	Score = 315 bits (170), Expect = 3e-082	emb|FP601882.1| FP601882 Hirudo medicinalis normalized library Hirudo medicinalis cDNA, mRNA sequence.Length=567	Score = 436 bits (236), Expect = 5e-119
Contig30589	F1UMNMG01BEBR3	Length=394	tr|B4N5L0|B4N5L0_DROWI GK12697 (monooxygenase activity) OS=Drosophila willistoni GN=GK12697 PE=4 SV=1Length=182	Score = 79.7 bits (195), Expect = 2e-013	gb|FJ040535.1| Protoplasa fitchii 28S ribosomal RNA gene, partial sequenceLength=4142	Score = 211 bits (114), Expect = 3e-051	emb|FP601882.1| FP601882 Hirudo medicinalis normalized library Hirudo medicinalis cDNA, mRNA sequence.Length=567	Score = 296 bits (160), Expect = 6e-077
Contig30589	F1UMNMG01B9IHU	Length=348	tr|B4N5L0|B4N5L0_DROWI GK12697 (monooxygenase activity) OS=Drosophila willistoni GN=GK12697 PE=4 SV=1Length=182	Score = 73.2 bits (178), Expect = 2e-011	gb|FJ040566.1| Phlebotomus duboscqi 28S ribosomal RNA gene, partial sequenceLength=3898	Score = 252 bits (136), Expect = 1e-063	emb|FP601882.1| FP601882 Hirudo medicinalis normalized library Hirudo medicinalis cDNA, mRNA sequence.Length=567	Score = 344 bits (186), Expect = 2e-091
Contig30589	F1UMNMG01CL9OS	Length=364	tr|B4N5L0|B4N5L0_DROWI GK12697 (monooxygenase activity) OS=Drosophila willistoni GN=GK12697 PE=4 SV=1Length=182	Score = 74.3 bits (181), Expect = 9e-012	No Hit		emb|FP601882.1| FP601882 Hirudo medicinalis normalized library Hirudo medicinalis cDNA, mRNA sequence.Length=567	Score = 281 bits (152), Expect = 2e-072
Contig30589	F1UMNMG01BL0H5	Length=351	No Hit		gb|FJ040566.1| Phlebotomus duboscqi 28S ribosomal RNA gene, partial sequenceLength=3898	Score = 241 bits (130), Expect = 3e-060	emb|FP601882.1| FP601882 Hirudo medicinalis normalized library Hirudo medicinalis cDNA, mRNA sequence.Length=567	Score = 327 bits (177), Expect = 2e-086
Contig30589	F1UMNMG01BQ6KF	Length=365	tr|B4N5L0|B4N5L0_DROWI GK12697 (monooxygenase activity) OS=Drosophila willistoni GN=GK12697 PE=4 SV=1Length=182	Score = 76.6 bits (187), Expect = 2e-012	gb|FJ040566.1| Phlebotomus duboscqi 28S ribosomal RNA gene, partial sequenceLength=3898	Score = 250 bits (135), Expect = 6e-063	emb|FP601882.1| FP601882 Hirudo medicinalis normalized library Hirudo medicinalis cDNA, mRNA sequence.Length=567	Score = 420 bits (227), Expect = 3e-114
Contig30589	F1UMNMG01AOWJK	Length=538	tr|A9U509|A9U509_PHYPA Predicted protein (Fragment) OS=Physcomitrella patens subsp. patens GN=PHYPADRAFT_156553 PE=4 SV=1Length=107	Score = 61.6 bits (148), Expect = 7e-008	gb|FJ040566.1| Phlebotomus duboscqi 28S ribosomal RNA gene, partial sequenceLength=3898	Score = 309 bits (167), Expect = 1e-080	emb|FP601882.1| FP601882 Hirudo medicinalis normalized library Hirudo medicinalis cDNA, mRNA sequence.Length=567	Score = 322 bits (174), Expect = 1e-084
Contig30589	F1UMNMG01A8R5N	Length=328	tr|B4N5L0|B4N5L0_DROWI GK12697 (monooxygenase activity) OS=Drosophila willistoni GN=GK12697 PE=4 SV=1Length=182	Score = 74.3 bits (181), Expect = 8e-012	No Hit		emb|FP601882.1| FP601882 Hirudo medicinalis normalized library Hirudo medicinalis cDNA, mRNA sequence.Length=567	Score = 361 bits (195), Expect = 2e-096
Contig30589	F1UMNMG01BQIEM	Length=531	tr|B4N5L0|B4N5L0_DROWI GK12697 (monooxygenase activity) OS=Drosophila willistoni GN=GK12697 PE=4 SV=1Length=182	Score = 74.3 bits (181), Expect = 9e-012	No Hit		No Hit
Contig30589	F1UMNMG01BFB3U	Length=414	tr|B4N5L0|B4N5L0_DROWI GK12697 (monooxygenase activity) OS=Drosophila willistoni GN=GK12697 PE=4 SV=1Length=182	Score = 73.2 bits (178), Expect = 2e-011	No Hit		emb|FP601882.1| FP601882 Hirudo medicinalis normalized library Hirudo medicinalis cDNA, mRNA sequence.Length=567	Score = 407 bits (220), Expect = 3e-110
Contig30589	F1UMNMG01BKH8K	Length=330	tr|B4N5L0|B4N5L0_DROWI GK12697 (monooxygenase activity) OS=Drosophila willistoni GN=GK12697 PE=4 SV=1Length=182	Score = 75.1 bits (183), Expect = 5e-012	No Hit		emb|FP601882.1| FP601882 Hirudo medicinalis normalized library Hirudo medicinalis cDNA, mRNA sequence.Length=567	Score = 268 bits (145), Expect = 1e-068
Contig30589	F1UMNMG01BQARH	Length=258	tr|B4N5L0|B4N5L0_DROWI GK12697 (monooxygenase activity) OS=Drosophila willistoni GN=GK12697 PE=4 SV=1Length=182	Score = 72.4 bits (176), Expect = 3e-011	No Hit		No Hit
Contig30589	F1UMNMG01BVDSO	Length=237	tr|B4N5L0|B4N5L0_DROWI GK12697 (monooxygenase activity) OS=Drosophila willistoni GN=GK12697 PE=4 SV=1Length=182	Score = 73.2 bits (178), Expect = 2e-011	No Hit		No Hit
Contig30589	F1UMNMG01AUP0Z	Length=343	tr|B4N5L0|B4N5L0_DROWI GK12697 (monooxygenase activity) OS=Drosophila willistoni GN=GK12697 PE=4 SV=1Length=182	Score = 67.0 bits (162), Expect = 1e-009	gb|FJ040566.1| Phlebotomus duboscqi 28S ribosomal RNA gene, partial sequenceLength=3898	Score = 230 bits (124), Expect = 7e-057	emb|FP601882.1| FP601882 Hirudo medicinalis normalized library Hirudo medicinalis cDNA, mRNA sequence.Length=567	Score = 322 bits (174), Expect = 9e-085
Contig30589	F1UMNMG01A5T6Q	Length=350	tr|B4N5L0|B4N5L0_DROWI GK12697 (monooxygenase activity) OS=Drosophila willistoni GN=GK12697 PE=4 SV=1Length=182	Score = 74.3 bits (181), Expect = 9e-012	gb|FJ040566.1| Phlebotomus duboscqi 28S ribosomal RNA gene, partial sequenceLength=3898	Score = 246 bits (133), Expect = 7e-062	emb|FP601882.1| FP601882 Hirudo medicinalis normalized library Hirudo medicinalis cDNA, mRNA sequence.Length=567	Score = 322 bits (174), Expect = 9e-085
Contig30589	F1UMNMG01BTGKI	Length=198	No Hit		gb|FJ040566.1| Phlebotomus duboscqi 28S ribosomal RNA gene, partial sequenceLength=3898	Score = 276 bits (149), Expect = 5e-071	emb|FP601882.1| FP601882 Hirudo medicinalis normalized library Hirudo medicinalis cDNA, mRNA sequence.Length=567	Score = 279 bits (151), Expect = 3e-072
Contig15118	F1UMNMG01B2KE4	Length=568	No Hit		No Hit		emb|AM093891.1| AM093891 Lutzomyia longipalpis Jacobina whole fly Lutzomyia longipalpis cDNA clone NSFM-40b02, mRNA sequence.Length=1353	Score = 706 bits (382), Expect = 0.0
Contig15118	F1UMNMG01BRCH3	Length=483	No Hit		No Hit		emb|AM093889.1| AM093889 Lutzomyia longipalpis Jacobina whole fly Lutzomyia longipalpis cDNA clone NSFM-40b02, mRNA sequence.Length=1371	Score = 667 bits (361), Expect = 0.0
Contig15118	F1UMNMG01BKEQC	Length=561	No Hit		No Hit		emb|AM093891.1| AM093891 Lutzomyia longipalpis Jacobina whole fly Lutzomyia longipalpis cDNA clone NSFM-40b02, mRNA sequence.Length=1353	Score = 791 bits (428), Expect = 0.0
Contig15118	F1UMNMG01CERQB	Length=547	No Hit		No Hit		emb|AM093891.1| AM093891 Lutzomyia longipalpis Jacobina whole fly Lutzomyia longipalpis cDNA clone NSFM-40b02, mRNA sequence.Length=1353	Score = 562 bits (304), Expect = 8e-157
Contig15118	F1UMNMG01BEHBE	Length=555	No Hit		No Hit		emb|AM093891.1| AM093891 Lutzomyia longipalpis Jacobina whole fly Lutzomyia longipalpis cDNA clone NSFM-40b02, mRNA sequence.Length=1353	Score = 841 bits (455), Expect = 0.0
Contig15118	F1UMNMG01CD31G	Length=488	tr|E9HM72|E9HM72_DAPPU CTR1, high-affinity copper uptake protein 1, copper transporter 1, solute carrier family 31 member 1 OS=Daphnia pulex GN=CTR1 PE=4 SV=1Length=171	Score = 85.5 bits (210), Expect = 4e-015	No Hit		emb|AM093890.1| AM093890 Lutzomyia longipalpis Jacobina whole fly Lutzomyia longipalpis cDNA clone NSFM-89a05, mRNA sequence.Length=1250	Score = 767 bits (415), Expect = 0.0
Contig15118	F1UMNMG01CN0DT	Length=491	tr|E3WUT6|E3WUT6_ANODA Putative uncharacterized protein (copper ion transmembrane transporter activity) OS=Anopheles darlingi GN=AND_07278 PE=4 SV=1Length=153	Score = 101 bits (251), Expect = 7e-020	No Hit		emb|AM093890.1| AM093890 Lutzomyia longipalpis Jacobina whole fly Lutzomyia longipalpis cDNA clone NSFM-89a05, mRNA sequence.Length=1250	Score = 798 bits (432), Expect = 0.0
Contig15118	F1UMNMG01B1N0G	Length=849	No Hit		No Hit		emb|AM093891.1| AM093891 Lutzomyia longipalpis Jacobina whole fly Lutzomyia longipalpis cDNA clone NSFM-40b02, mRNA sequence.Length=1353	Score = 503 bits (272), Expect = 8e-139
Contig15118	F1UMNMG01B7C93	Length=482	tr|E3WUT6|E3WUT6_ANODA Putative uncharacterized protein (copper ion transmembrane transporter activity) OS=Anopheles darlingi GN=AND_07278 PE=4 SV=1Length=153	Score = 102 bits (255), Expect = 2e-020	No Hit		emb|AM093889.1| AM093889 Lutzomyia longipalpis Jacobina whole fly Lutzomyia longipalpis cDNA clone NSFM-40b02, mRNA sequence.Length=1371	Score = 802 bits (434), Expect = 0.0
Contig15118	F1UMNMG01BJZLN	Length=488	tr|E3WUT6|E3WUT6_ANODA Putative uncharacterized protein (copper ion transmembrane transporter activity) OS=Anopheles darlingi GN=AND_07278 PE=4 SV=1Length=153	Score = 101 bits (251), Expect = 7e-020	No Hit		emb|AM093890.1| AM093890 Lutzomyia longipalpis Jacobina whole fly Lutzomyia longipalpis cDNA clone NSFM-89a05, mRNA sequence.Length=1250	Score = 869 bits (470), Expect = 0.0
Contig15118	F1UMNMG01ASHPP	Length=444	No Hit		No Hit		emb|AM093891.1| AM093891 Lutzomyia longipalpis Jacobina whole fly Lutzomyia longipalpis cDNA clone NSFM-40b02, mRNA sequence.Length=1353	Score = 405 bits (219), Expect = 1e-109
Contig15118	F1UMNMG01BOQN7	Length=479	No Hit		No Hit		emb|AM093891.1| AM093891 Lutzomyia longipalpis Jacobina whole fly Lutzomyia longipalpis cDNA clone NSFM-40b02, mRNA sequence.Length=1353	Score = 638 bits (345), Expect = 1e-179
Contig15118	F1UMNMG01BV6GA	Length=460	tr|E3WUT6|E3WUT6_ANODA Putative uncharacterized protein (copper ion transmembrane transporter activity) OS=Anopheles darlingi GN=AND_07278 PE=4 SV=1Length=153	Score = 99.4 bits (246), Expect = 2e-019	No Hit		emb|AM093890.1| AM093890 Lutzomyia longipalpis Jacobina whole fly Lutzomyia longipalpis cDNA clone NSFM-89a05, mRNA sequence.Length=1250	Score = 702 bits (380), Expect = 0.0
Contig21297	F1UMNMG01CCJPA	Length=343	tr|E2ANF3|E2ANF3_CAMFO Putative uncharacterized protein OS=Camponotus floridanus GN=EAG_01178 PE=4 SV=1Length=298	Score = 58.9 bits (141), Expect = 4e-007	gb|FJ040566.1| Phlebotomus duboscqi 28S ribosomal RNA gene, partial sequenceLength=3898	Score = 215 bits (116), Expect = 2e-052	emb|FP601882.1| FP601882 Hirudo medicinalis normalized library Hirudo medicinalis cDNA, mRNA sequence.Length=567	Score = 298 bits (161), Expect = 1e-077
Contig21297	F1UMNMG01A0HGF	Length=342	tr|E2ANF3|E2ANF3_CAMFO Putative uncharacterized protein OS=Camponotus floridanus GN=EAG_01178 PE=4 SV=1Length=298	Score = 58.9 bits (141), Expect = 4e-007	gb|FJ040566.1| Phlebotomus duboscqi 28S ribosomal RNA gene, partial sequenceLength=3898	Score = 215 bits (116), Expect = 2e-052	emb|FP601882.1| FP601882 Hirudo medicinalis normalized library Hirudo medicinalis cDNA, mRNA sequence.Length=567	Score = 298 bits (161), Expect = 1e-077
Contig21297	F1UMNMG01BFZX6	Length=538	tr|G7K0E9|G7K0E9_MEDTR Cytochrome P450 likeTBP OS=Medicago truncatula GN=MTR_5g051190 PE=4 SV=1Length=656	Score = 82.4 bits (202), Expect = 3e-014	gb|FJ040566.1| Phlebotomus duboscqi 28S ribosomal RNA gene, partial sequenceLength=3898	Score = 322 bits (174), Expect = 2e-084	emb|FP595913.1| FP595913 Hirudo medicinalis normalized library Hirudo medicinalis cDNA, mRNA sequence.Length=540	Score = 327 bits (177), Expect = 3e-086
Contig21297	F1UMNMG01A12EC	Length=342	tr|E2ANF3|E2ANF3_CAMFO Putative uncharacterized protein OS=Camponotus floridanus GN=EAG_01178 PE=4 SV=1Length=298	Score = 58.9 bits (141), Expect = 4e-007	gb|FJ040566.1| Phlebotomus duboscqi 28S ribosomal RNA gene, partial sequenceLength=3898	Score = 215 bits (116), Expect = 2e-052	emb|FP601882.1| FP601882 Hirudo medicinalis normalized library Hirudo medicinalis cDNA, mRNA sequence.Length=567	Score = 298 bits (161), Expect = 1e-077
Contig21297	F1UMNMG01CEM6Q	Length=342	No Hit		No Hit		emb|FP601882.1| FP601882 Hirudo medicinalis normalized library Hirudo medicinalis cDNA, mRNA sequence.Length=567	Score = 287 bits (155), Expect = 3e-074
Contig21297	F1UMNMG01AVNN9	Length=342	tr|E2ANF3|E2ANF3_CAMFO Putative uncharacterized protein OS=Camponotus floridanus GN=EAG_01178 PE=4 SV=1Length=298	Score = 58.9 bits (141), Expect = 4e-007	gb|FJ040566.1| Phlebotomus duboscqi 28S ribosomal RNA gene, partial sequenceLength=3898	Score = 215 bits (116), Expect = 2e-052	emb|FP601882.1| FP601882 Hirudo medicinalis normalized library Hirudo medicinalis cDNA, mRNA sequence.Length=567	Score = 298 bits (161), Expect = 1e-077
Contig21297	F1UMNMG01BQ3HD	Length=335	No Hit		No Hit		emb|FP601882.1| FP601882 Hirudo medicinalis normalized library Hirudo medicinalis cDNA, mRNA sequence.Length=567	Score = 287 bits (155), Expect = 3e-074
Contig21297	F1UMNMG01B5RZ8	Length=346	No Hit		No Hit		emb|FP601882.1| FP601882 Hirudo medicinalis normalized library Hirudo medicinalis cDNA, mRNA sequence.Length=567	Score = 287 bits (155), Expect = 3e-074
Contig21297	F1UMNMG01BS342	Length=337	No Hit		No Hit		emb|FP601882.1| FP601882 Hirudo medicinalis normalized library Hirudo medicinalis cDNA, mRNA sequence.Length=567	Score = 287 bits (155), Expect = 3e-074
Contig21297	F1UMNMG01A6JXF	Length=338	No Hit		No Hit		emb|FP601882.1| FP601882 Hirudo medicinalis normalized library Hirudo medicinalis cDNA, mRNA sequence.Length=567	Score = 287 bits (155), Expect = 3e-074
Contig21934	F1UMNMG01B11UX	Length=567	No Hit		gb|AC240671.1| Lutzomyia longipalpis BAC CUGI_LL_CBa-97I08 complete sequenceLength=73113	Score = 339 bits (183), Expect = 2e-089	emb|AM098160.1| AM098160 Lutzomyia longipalpis Jacobina whole fly Lutzomyia longipalpis cDNA clone NSFM-11f05, mRNA sequence.Length=1097	Score = 305 bits (165), Expect = 2e-079
Contig21934	F1UMNMG01BV3XZ	Length=596	No Hit		gb|AC240671.1| Lutzomyia longipalpis BAC CUGI_LL_CBa-97I08 complete sequenceLength=73113	Score = 331 bits (179), Expect = 3e-087	emb|AM097061.1| AM097061 Lutzomyia longipalpis Jacobina whole fly Lutzomyia longipalpis cDNA clone NSFM-05h02, mRNA sequence.Length=1142	Score = 291 bits (157), Expect = 4e-075
Contig21934	F1UMNMG01A7O03	Length=568	No Hit		gb|AC240671.1| Lutzomyia longipalpis BAC CUGI_LL_CBa-97I08 complete sequenceLength=73113	Score = 340 bits (184), Expect = 5e-090	emb|AM097061.1| AM097061 Lutzomyia longipalpis Jacobina whole fly Lutzomyia longipalpis cDNA clone NSFM-05h02, mRNA sequence.Length=1142	Score = 302 bits (163), Expect = 2e-078
Contig21934	F1UMNMG01BN0JR	Length=566	No Hit		gb|AC240671.1| Lutzomyia longipalpis BAC CUGI_LL_CBa-97I08 complete sequenceLength=73113	Score = 355 bits (192), Expect = 2e-094	emb|AM097061.1| AM097061 Lutzomyia longipalpis Jacobina whole fly Lutzomyia longipalpis cDNA clone NSFM-05h02, mRNA sequence.Length=1142	Score = 316 bits (171), Expect = 7e-083
Contig21934	F1UMNMG01CJ5LG	Length=567	No Hit		gb|AC240671.1| Lutzomyia longipalpis BAC CUGI_LL_CBa-97I08 complete sequenceLength=73113	Score = 344 bits (186), Expect = 4e-091	emb|AM098160.1| AM098160 Lutzomyia longipalpis Jacobina whole fly Lutzomyia longipalpis cDNA clone NSFM-11f05, mRNA sequence.Length=1097	Score = 303 bits (164), Expect = 5e-079
Contig21934	F1UMNMG01BJG54	Length=575	No Hit		gb|AC240671.1| Lutzomyia longipalpis BAC CUGI_LL_CBa-97I08 complete sequenceLength=73113	Score = 333 bits (180), Expect = 9e-088	emb|AM098160.1| AM098160 Lutzomyia longipalpis Jacobina whole fly Lutzomyia longipalpis cDNA clone NSFM-11f05, mRNA sequence.Length=1097	Score = 302 bits (163), Expect = 2e-078
Contig21934	F1UMNMG01B3RUQ	Length=645	No Hit		gb|AC240671.1| Lutzomyia longipalpis BAC CUGI_LL_CBa-97I08 complete sequenceLength=73113	Score = 270 bits (146), Expect = 8e-069	emb|AM098160.1| AM098160 Lutzomyia longipalpis Jacobina whole fly Lutzomyia longipalpis cDNA clone NSFM-11f05, mRNA sequence.Length=1097	Score = 244 bits (132), Expect = 4e-061
Contig4366	F1UMNMG01CBEDR	Length=193	No Hit		No Hit		No Hit
Contig4366	F1UMNMG01ANE6W	Length=192	No Hit		No Hit		No Hit
Contig4366	F1UMNMG01B0XT5	Length=192	No Hit		No Hit		No Hit
Contig4366	F1UMNMG01BRO2R	Length=193	No Hit		No Hit		No Hit
Contig4366	F1UMNMG01A963V	Length=194	No Hit		No Hit		No Hit
Contig17575	F1UMNMG01APIG7	Length=479	tr|D3TLF2|D3TLF2_GLOMM Adenosine monophosphate deaminase OS=Glossina morsitans morsitans PE=2 SV=1Length=774	Score = 232 bits (592), Expect(2) = 5e-067	No Hit		emb|AM106748.1| AM106748 Lutzomyia longipalpis Jacobina whole fly Lutzomyia longipalpis cDNA clone NSFM-62f06, mRNA sequence.Length=1303	Score = 706 bits (382), Expect = 0.0
Contig17575	F1UMNMG01BJ9O8	Length=485	tr|D3TLF2|D3TLF2_GLOMM Adenosine monophosphate deaminase OS=Glossina morsitans morsitans PE=2 SV=1Length=774	Score = 214 bits (545), Expect(2) = 1e-063	No Hit		emb|AM106748.1| AM106748 Lutzomyia longipalpis Jacobina whole fly Lutzomyia longipalpis cDNA clone NSFM-62f06, mRNA sequence.Length=1303	Score = 710 bits (384), Expect = 0.0
Contig17575	F1UMNMG01A44AL	Length=482	tr|D3TLF2|D3TLF2_GLOMM Adenosine monophosphate deaminase OS=Glossina morsitans morsitans PE=2 SV=1Length=774	Score = 272 bits (695), Expect = 2e-071	No Hit		emb|AM106748.1| AM106748 Lutzomyia longipalpis Jacobina whole fly Lutzomyia longipalpis cDNA clone NSFM-62f06, mRNA sequence.Length=1303	Score = 715 bits (387), Expect = 0.0
Contig17575	F1UMNMG01AU3QN	Length=483	tr|D3TLF2|D3TLF2_GLOMM Adenosine monophosphate deaminase OS=Glossina morsitans morsitans PE=2 SV=1Length=774	Score = 214 bits (545), Expect(2) = 2e-064	No Hit		emb|AM106748.1| AM106748 Lutzomyia longipalpis Jacobina whole fly Lutzomyia longipalpis cDNA clone NSFM-62f06, mRNA sequence.Length=1303	Score = 706 bits (382), Expect = 0.0
Contig10948	F1UMNMG01CGCY8	Length=520	tr|Q17IP0|Q17IP0_AEDAE Ctl2 (Fragment) Belongs to the CTL (choline transporter-like) family; family of proteins probably involved in transport through the plasma membrane OS=Aedes aegypti GN=AAEL002280 PE=4 SV=1Length=700	Score = 99.8 bits (247), Expect(2) = 1e-022	No Hit		emb|AM096313.1| AM096313 Lutzomyia longipalpis Jacobina whole fly Lutzomyia longipalpis cDNA clone NSFM-82d04, mRNA sequence.Length=1191	Score = 525 bits (284), Expect = 1e-145
Contig10948	F1UMNMG01AY53N	Length=503	tr|Q17IP0|Q17IP0_AEDAE Ctl2 (Fragment) Belongs to the CTL (choline transporter-like) family; family of proteins probably involved in transport through the plasma membrane OS=Aedes aegypti GN=AAEL002280 PE=4 SV=1Length=700	Score = 139 bits (349), Expect = 3e-031	No Hit		emb|AM096313.1| AM096313 Lutzomyia longipalpis Jacobina whole fly Lutzomyia longipalpis cDNA clone NSFM-82d04, mRNA sequence.Length=1191	Score = 628 bits (340), Expect = 7e-177
Contig10948	F1UMNMG01AZT7N	Length=495	tr|Q17IP0|Q17IP0_AEDAE Ctl2 (Fragment) Belongs to the CTL (choline transporter-like) family; family of proteins probably involved in transport through the plasma membrane OS=Aedes aegypti GN=AAEL002280 PE=4 SV=1Length=700	Score = 157 bits (396), Expect = 1e-036	No Hit		emb|AM096313.1| AM096313 Lutzomyia longipalpis Jacobina whole fly Lutzomyia longipalpis cDNA clone NSFM-82d04, mRNA sequence.Length=1191	Score = 582 bits (315), Expect = 5e-163
Contig10948	F1UMNMG01ARK4S	Length=465	tr|Q17IP0|Q17IP0_AEDAE Ctl2 (Fragment) Belongs to the CTL (choline transporter-like) family; family of proteins probably involved in transport through the plasma membrane OS=Aedes aegypti GN=AAEL002280 PE=4 SV=1Length=700	Score = 140 bits (354), Expect = 7e-032	No Hit		emb|AM096313.1| AM096313 Lutzomyia longipalpis Jacobina whole fly Lutzomyia longipalpis cDNA clone NSFM-82d04, mRNA sequence.Length=1191	Score = 534 bits (289), Expect = 1e-148
Contig9187	F1UMNMG01CF315	Length=550	No Hit		No Hit		No Hit
Contig9187	F1UMNMG01BLJ62	Length=550	No Hit		No Hit		No Hit
Contig9187	F1UMNMG01B84GL	Length=558	No Hit		No Hit		No Hit
Contig638	F1UMNMG01BX4W6	Length=563	No Hit		gb|AC240671.1| Lutzomyia longipalpis BAC CUGI_LL_CBa-97I08 complete sequenceLength=73113	Score = 287 bits (155), Expect = 7e-074	emb|AM101240.1| AM101240 Lutzomyia longipalpis Jacobina whole fly Lutzomyia longipalpis cDNA clone NSFM-30d10, mRNA sequence.Length=1091	Score = 303 bits (164), Expect = 5e-079
Contig638	F1UMNMG01BUYRQ	Length=571	No Hit		gb|AC240671.1| Lutzomyia longipalpis BAC CUGI_LL_CBa-97I08 complete sequenceLength=73113	Score = 281 bits (152), Expect = 3e-072	emb|AM097061.1| AM097061 Lutzomyia longipalpis Jacobina whole fly Lutzomyia longipalpis cDNA clone NSFM-05h02, mRNA sequence.Length=1142	Score = 298 bits (161), Expect = 3e-077
Contig638	F1UMNMG01APVW2	Length=409	No Hit		No Hit		emb|AM101241.1| AM101241 Lutzomyia longipalpis Jacobina whole fly Lutzomyia longipalpis cDNA clone NSFM-30d10, mRNA sequence.Length=1325	Score = 233 bits (126), Expect = 5e-058
Contig25445	F1UMNMG01CD2IO	Length=498	No Hit		No Hit		No Hit
Contig25445	F1UMNMG01BQ7R6	Length=476	No Hit		No Hit		No Hit
Contig25445	F1UMNMG01AYWKJ	Length=478	No Hit		No Hit		No Hit
Contig9190	F1UMNMG01BAPQX	Length=768	No Hit		No Hit		No Hit
Contig9190	F1UMNMG01AWLAM	Length=587	No Hit		No Hit		gb|EW995639.1| LJGU-M-5_E01 Adult female Lutzomyia longipalpis midgut library sugar fed Lutzomyia longipalpis cDNA, mRNA sequence.Length=559	Score = 224 bits (121), Expect = 4e-055
Contig8996	F1UMNMG01AOTIG	Length=542	No Hit		No Hit		gb|EW987543.1| LJGF-L-5_B05 Adult female Lutzomyia longipalpis midgut library blood fed Lutzomyia longipalpis cDNA, mRNA sequence.Length=683	Score = 276 bits (149), Expect = 1e-070
Contig8996	F1UMNMG01A5DCE	Length=498	tr|B4LT21|B4LT21_DROVI GJ10873 (Seryl-tRNA synthetase; seryl-tRNA aminoacylation) OS=Drosophila virilis GN=GJ10873 PE=3 SV=1Length=501	Score = 132 bits (333), Expect(2) = 3e-049	No Hit		gb|EW993040.1| LJGDIM21_A05 Adult female Lutzomyia longipalpis midgut library post blood meal digestion containing Leishmania chagasi Lutzomyia longipalpis cDNA, mRNA sequence.Length=1086	Score = 791 bits (428), Expect = 0.0
Contig8522	F1UMNMG01AZ3VC	Length=515	No Hit		No Hit		No Hit
Contig8522	F1UMNMG01A61QQ	Length=501	No Hit		No Hit		gb|EW995639.1| LJGU-M-5_E01 Adult female Lutzomyia longipalpis midgut library sugar fed Lutzomyia longipalpis cDNA, mRNA sequence.Length=559	Score = 241 bits (130), Expect = 4e-060
Contig8505	F1UMNMG01A8EEE	Length=578	No Hit		gb|AC240671.1| Lutzomyia longipalpis BAC CUGI_LL_CBa-97I08 complete sequenceLength=73113	Score = 298 bits (161), Expect = 3e-077	emb|AM097061.1| AM097061 Lutzomyia longipalpis Jacobina whole fly Lutzomyia longipalpis cDNA clone NSFM-05h02, mRNA sequence.Length=1142	Score = 305 bits (165), Expect = 2e-079
Contig8505	F1UMNMG01AQTV0	Length=411	No Hit		gb|AC240671.1| Lutzomyia longipalpis BAC CUGI_LL_CBa-97I08 complete sequenceLength=73113	Score = 344 bits (186), Expect = 3e-091	emb|AM097061.1| AM097061 Lutzomyia longipalpis Jacobina whole fly Lutzomyia longipalpis cDNA clone NSFM-05h02, mRNA sequence.Length=1142	Score = 353 bits (191), Expect = 4e-094
Contig7774	F1UMNMG01ASHNA	Length=564	No Hit		gb|AC240671.1| Lutzomyia longipalpis BAC CUGI_LL_CBa-97I08 complete sequenceLength=73113	Score = 342 bits (185), Expect = 1e-090	emb|AM098160.1| AM098160 Lutzomyia longipalpis Jacobina whole fly Lutzomyia longipalpis cDNA clone NSFM-11f05, mRNA sequence.Length=1097	Score = 296 bits (160), Expect = 9e-077
Contig7774	F1UMNMG01BMXPH	Length=567	No Hit		gb|AC240671.1| Lutzomyia longipalpis BAC CUGI_LL_CBa-97I08 complete sequenceLength=73113	Score = 329 bits (178), Expect = 1e-086	emb|AM097061.1| AM097061 Lutzomyia longipalpis Jacobina whole fly Lutzomyia longipalpis cDNA clone NSFM-05h02, mRNA sequence.Length=1142	Score = 296 bits (160), Expect = 9e-077
Contig6260	F1UMNMG01ATCQS	Length=561	tr|E0W1Z3|E0W1Z3_PEDHC Breast cancer type 2 susceptibility protein brca2, putative; double-strand break repair via homologous recombination; regulation of S phase of mitotic cell cycle OS=Pediculus humanus subsp. corporis GN=Phum_PHUM580760 PE=4 SV=1Length=1405	Score = 129 bits (324), Expect = 3e-028	No Hit		No Hit
Contig6260	F1UMNMG01CK70B	Length=550	tr|E0W1Z3|E0W1Z3_PEDHC Breast cancer type 2 susceptibility protein brca2, putative; double-strand break repair via homologous recombination; regulation of S phase of mitotic cell cycle OS=Pediculus humanus subsp. corporis GN=Phum_PHUM580760 PE=4 SV=1Length=1405	Score = 118 bits (295), Expect = 6e-025	No Hit		No Hit
Contig5929	F1UMNMG01BR22S	Length=346	No Hit		No Hit		emb|FP601882.1| FP601882 Hirudo medicinalis normalized library Hirudo medicinalis cDNA, mRNA sequence.Length=567	Score = 399 bits (216), Expect = 4e-108
Contig5929	F1UMNMG01ANIIE	Length=670	tr|B4N5L0|B4N5L0_DROWI GK12697 (monooxygenase activity) OS=Drosophila willistoni GN=GK12697 PE=4 SV=1Length=182	Score = 74.3 bits (181), Expect = 2e-011	No Hit		emb|FP601882.1| FP601882 Hirudo medicinalis normalized library Hirudo medicinalis cDNA, mRNA sequence.Length=567	Score = 300 bits (162), Expect = 8e-078
Contig5826	F1UMNMG01CEZMF	Length=478	tr|B0WNG3|B0WNG3_CULQU Oligosaccharyl transferase (N-linked glycosylation is a ubiquitous protein modification, and is essential for viability in eukaryotic cells) OS=Culex quinquefasciatus GN=CpipJ_CPIJ008679 PE=4 SV=1Length=777	Score = 220 bits (560), Expect = 1e-055	No Hit		No Hit
Contig5826	F1UMNMG01BC99S	Length=483	tr|B0WNG3|B0WNG3_CULQU Oligosaccharyl transferase (N-linked glycosylation is a ubiquitous protein modification, and is essential for viability in eukaryotic cells) OS=Culex quinquefasciatus GN=CpipJ_CPIJ008679 PE=4 SV=1Length=777	Score = 161 bits (407), Expect(2) = 3e-050	No Hit		No Hit
Contig5231	F1UMNMG01CHFR5	Length=516	tr|Q16UB8|Q16UB8_AEDAE Putative uncharacterized protein (Apolipophorins; lipid transporter activity) OS=Aedes aegypti GN=AAEL009955 PE=4 SV=1Length=3321	Score = 181 bits (460), Expect = 4e-044	No Hit		emb|AM103887.1| AM103887 Lutzomyia longipalpis Jacobina whole fly Lutzomyia longipalpis cDNA clone NSFM-17b10, mRNA sequence.Length=1273	Score = 490 bits (265), Expect = 3e-135
Contig5231	F1UMNMG01B73K8	Length=515	tr|Q16UB8|Q16UB8_AEDAE Putative uncharacterized protein (Apolipophorins; lipid transporter activity) OS=Aedes aegypti GN=AAEL009955 PE=4 SV=1Length=3321	Score = 101 bits (252), Expect(2) = 9e-039	No Hit		emb|AM103887.1| AM103887 Lutzomyia longipalpis Jacobina whole fly Lutzomyia longipalpis cDNA clone NSFM-17b10, mRNA sequence.Length=1273	Score = 486 bits (263), Expect = 5e-134
Contig4238	F1UMNMG01B1H8C	Length=594	No Hit		No Hit		gb|EX211692.1| ALYTINFD02F02 Lutzomyia longipalpis Infected Lutzomyia longipalpis cDNA 5', mRNA sequence.Length=571	Score = 346 bits (187), Expect = 9e-092
Contig4238	F1UMNMG01CIGVQ	Length=604	No Hit		No Hit		emb|AM092123.1| AM092123 Lutzomyia longipalpis Jacobina whole fly Lutzomyia longipalpis cDNA clone NSFM-39d11, mRNA sequence.Length=913	Score = 407 bits (220), Expect = 4e-110
Contig3932	F1UMNMG01A27NQ	Length=794	No Hit		gb|AC240671.1| Lutzomyia longipalpis BAC CUGI_LL_CBa-97I08 complete sequenceLength=73113	Score = 213 bits (115), Expect = 2e-051	emb|AM098160.1| AM098160 Lutzomyia longipalpis Jacobina whole fly Lutzomyia longipalpis cDNA clone NSFM-11f05, mRNA sequence.Length=1097	Score = 237 bits (128), Expect = 8e-059
Contig3932	F1UMNMG01CIDPT	Length=610	No Hit		No Hit		emb|AM098160.1| AM098160 Lutzomyia longipalpis Jacobina whole fly Lutzomyia longipalpis cDNA clone NSFM-11f05, mRNA sequence.Length=1097	Score = 220 bits (119), Expect = 6e-054
Contig34756	F1UMNMG01A4RQB	Length=366	No Hit		gb|EU124599.1| Lutzomyia longipalpis 60S acidic ribosomal protein P0-like protein mRNA, complete cdsLength=1213	Score = 547 bits (296), Expect = 2e-152	emb|AM095086.1| AM095086 Lutzomyia longipalpis Jacobina whole fly Lutzomyia longipalpis cDNA clone NSFM-73h10, mRNA sequence.Length=1299	Score = 569 bits (308), Expect = 3e-159
Contig34756	F1UMNMG01BEORN	Length=366	No Hit		gb|EU124599.1| Lutzomyia longipalpis 60S acidic ribosomal protein P0-like protein mRNA, complete cdsLength=1213	Score = 547 bits (296), Expect = 2e-152	emb|AM095086.1| AM095086 Lutzomyia longipalpis Jacobina whole fly Lutzomyia longipalpis cDNA clone NSFM-73h10, mRNA sequence.Length=1299	Score = 569 bits (308), Expect = 3e-159
Contig33170	F1UMNMG01COLNC	Length=508	tr|E2AL58|E2AL58_CAMFO Centrosomal protein of 164 kDa; Rsp5 or WWP domain; protein binding; It is frequently associated with other domains typical for proteins in signal transduction processes OS=Camponotus floridanus GN=EAG_04638 PE=4 SV=1Length=1335	Score = 63.9 bits (154), Expect = 1e-008	No Hit		No Hit
Contig33170	F1UMNMG01ANLFE	Length=505	tr|B4L5G9|B4L5G9_DROMO GI21515 (WW_Rsp5_WWP; protein binding; It is frequently associated with other domains typical for proteins in signal transduction processes) OS=Drosophila mojavensis GN=GI21515 PE=4 SV=1Length=1483	Score = 58.5 bits (140), Expect = 5e-007	No Hit		No Hit
Contig32328	F1UMNMG01AW7VE	Length=389	tr|Q9BIJ1|Q9BIJ1_DROVI Actin E2 OS=Drosophila virilis GN=ActE2 PE=3 SV=1Length=376	Score = 171 bits (434), Expect = 4e-041	ref|XM_002137119.2| Drosophila pseudoobscura pseudoobscura GA26730 (Dpse\GA26730), mRNALength=1144	Score = 289 bits (156), Expect = 1e-074	emb|AM103564.1| AM103564 Lutzomyia longipalpis Jacobina whole fly Lutzomyia longipalpis cDNA clone NSFM-27g09, mRNA sequence.Length=1292	Score = 555 bits (300), Expect = 9e-155
Contig32328	F1UMNMG01BLL1I	Length=453	tr|Q9BIJ1|Q9BIJ1_DROVI Actin E2 OS=Drosophila virilis GN=ActE2 PE=3 SV=1Length=376	Score = 171 bits (434), Expect = 4e-041	ref|XM_002137119.2| Drosophila pseudoobscura pseudoobscura GA26730 (Dpse\GA26730), mRNALength=1144	Score = 289 bits (156), Expect = 2e-074	emb|AM103563.1| AM103563 Lutzomyia longipalpis Jacobina whole fly Lutzomyia longipalpis cDNA clone SFM-04a10, mRNA sequence.Length=1266	Score = 507 bits (274), Expect = 3e-140
Contig29942	F1UMNMG01CJC22	Length=553	No Hit		gb|AC240671.1| Lutzomyia longipalpis BAC CUGI_LL_CBa-97I08 complete sequenceLength=73113	Score = 274 bits (148), Expect = 5e-070	gb|EW989821.1| LJGFIL9_D02 Adult female Lutzomyia longipalpis midgut library blood fed containing Leishmania chagasi Lutzomyia longipalpis cDNA, mRNA sequence.Length=774	Score = 296 bits (160), Expect = 9e-077
Contig29942	F1UMNMG01BHESG	Length=554	No Hit		gb|AC240671.1| Lutzomyia longipalpis BAC CUGI_LL_CBa-97I08 complete sequenceLength=73113	Score = 265 bits (143), Expect = 3e-067	emb|AM101241.1| AM101241 Lutzomyia longipalpis Jacobina whole fly Lutzomyia longipalpis cDNA clone NSFM-30d10, mRNA sequence.Length=1325	Score = 291 bits (157), Expect = 4e-075
Contig28873	F1UMNMG01B8GVC	Length=483	No Hit		gb|AC240671.1| Lutzomyia longipalpis BAC CUGI_LL_CBa-97I08 complete sequenceLength=73113	Score = 254 bits (137), Expect = 6e-064	emb|AM101240.1| AM101240 Lutzomyia longipalpis Jacobina whole fly Lutzomyia longipalpis cDNA clone NSFM-30d10, mRNA sequence.Length=1091	Score = 298 bits (161), Expect = 2e-077
Contig28873	F1UMNMG01BFROT	Length=485	No Hit		gb|AC240671.1| Lutzomyia longipalpis BAC CUGI_LL_CBa-97I08 complete sequenceLength=73113	Score = 250 bits (135), Expect = 8e-063	emb|AM101241.1| AM101241 Lutzomyia longipalpis Jacobina whole fly Lutzomyia longipalpis cDNA clone NSFM-30d10, mRNA sequence.Length=1325	Score = 292 bits (158), Expect = 1e-075
Contig26544	F1UMNMG01BENHZ	Length=410	tr|Q16YC2|Q16YC2_AEDAE Tep3 (negative regulation of endopeptidase activity) OS=Aedes aegypti GN=AAEL008607 PE=4 SV=1Length=1451	Score = 123 bits (309), Expect = 1e-026	No Hit		emb|AM104592.1| AM104592 Lutzomyia longipalpis Jacobina whole fly Lutzomyia longipalpis cDNA clone NSFM-143h01, mRNA sequence.Length=1223	Score = 586 bits (317), Expect = 3e-164
Contig26544	F1UMNMG01BEYRU	Length=501	tr|Q16YC2|Q16YC2_AEDAE Tep3 (negative regulation of endopeptidase activity) OS=Aedes aegypti GN=AAEL008607 PE=4 SV=1Length=1451	Score = 152 bits (384), Expect(2) = 2e-044	No Hit		emb|AM104594.1| AM104594 Lutzomyia longipalpis Jacobina whole fly Lutzomyia longipalpis cDNA clone NSFM-79f04, mRNA sequence.Length=1408	Score = 802 bits (434), Expect = 0.0
Contig25609	F1UMNMG01BXHVW	Length=552	No Hit		No Hit		No Hit
Contig25609	F1UMNMG01BT8MR	Length=554	No Hit		No Hit		No Hit
Contig24935	F1UMNMG01COS0O	Length=300	No Hit		No Hit		emb|AM101223.1| AM101223 Lutzomyia longipalpis Jacobina whole fly Lutzomyia longipalpis cDNA clone NSFM-29g07, mRNA sequence.Length=1422	Score = 472 bits (255), Expect = 7e-130
Contig24935	F1UMNMG01BJ5TH	Length=480	tr|B3ME14|B3ME14_DROAN GF13508 OS=Drosophila ananassae GN=GF13508 PE=4 SV=1Length=548	Score = 53.9 bits (128), Expect(2) = 1e-008	No Hit		emb|AM098509.1| AM098509 Lutzomyia longipalpis Jacobina whole fly Lutzomyia longipalpis cDNA clone NSFM-29g07, mRNA sequence.Length=1379	Score = 780 bits (422), Expect = 0.0
Contig22853	F1UMNMG01CKXPO	Length=610	No Hit		No Hit		No Hit
Contig22853	F1UMNMG01CD3I4	Length=567	No Hit		No Hit		No Hit
Contig21417	F1UMNMG01BQBVC	Length=547	tr|E3WVT8|E3WVT8_ANODA Putative uncharacterized protein (malate dehydrogenase 2; cellular carbohydrate metabolic process) OS=Anopheles darlingi GN=AND_07877 PE=3 SV=1Length=1337	Score = 142 bits (357), Expect(2) = 2e-038	No Hit		emb|AM100366.1| AM100366 Lutzomyia longipalpis Jacobina whole fly Lutzomyia longipalpis cDNA clone NSFM-164d01, mRNA sequence.Length=1369	Score = 887 bits (480), Expect = 0.0
Contig21417	F1UMNMG01AONX6	Length=546	tr|Q7PYE7|Q7PYE7_ANOGA AGAP001903-PA (Mitochondrial malate dehydrogenase 2; cellular carbohydrate metabolic process) OS=Anopheles gambiae GN=AGAP001903 PE=3 SV=4Length=337	Score = 182 bits (463), Expect = 2e-044	No Hit		emb|AM100366.1| AM100366 Lutzomyia longipalpis Jacobina whole fly Lutzomyia longipalpis cDNA clone NSFM-164d01, mRNA sequence.Length=1369	Score = 872 bits (472), Expect = 0.0
Contig20522	F1UMNMG01BYC4O	Length=540	No Hit		gb|AC240671.1| Lutzomyia longipalpis BAC CUGI_LL_CBa-97I08 complete sequenceLength=73113	Score = 261 bits (141), Expect = 4e-066	gb|EW989821.1| LJGFIL9_D02 Adult female Lutzomyia longipalpis midgut library blood fed containing Leishmania chagasi Lutzomyia longipalpis cDNA, mRNA sequence.Length=774	Score = 294 bits (159), Expect = 3e-076
Contig20522	F1UMNMG01CDZB1	Length=570	No Hit		gb|AC240671.1| Lutzomyia longipalpis BAC CUGI_LL_CBa-97I08 complete sequenceLength=73113	Score = 267 bits (144), Expect = 9e-068	gb|EW989821.1| LJGFIL9_D02 Adult female Lutzomyia longipalpis midgut library blood fed containing Leishmania chagasi Lutzomyia longipalpis cDNA, mRNA sequence.Length=774	Score = 298 bits (161), Expect = 3e-077
Contig19222	F1UMNMG01BYYMI	Length=388	No Hit		gb|AC240671.1| Lutzomyia longipalpis BAC CUGI_LL_CBa-97I08 complete sequenceLength=73113	Score = 279 bits (151), Expect = 8e-072	emb|AM097061.1| AM097061 Lutzomyia longipalpis Jacobina whole fly Lutzomyia longipalpis cDNA clone NSFM-05h02, mRNA sequence.Length=1142	Score = 300 bits (162), Expect = 5e-078
Contig19222	F1UMNMG01AQ8OU	Length=395	No Hit		gb|AC240671.1| Lutzomyia longipalpis BAC CUGI_LL_CBa-97I08 complete sequenceLength=73113	Score = 287 bits (155), Expect = 5e-074	emb|AM097061.1| AM097061 Lutzomyia longipalpis Jacobina whole fly Lutzomyia longipalpis cDNA clone NSFM-05h02, mRNA sequence.Length=1142	Score = 313 bits (169), Expect = 6e-082
Contig17984	F1UMNMG01B00RQ	Length=471	tr|A7UU65|A7UU65_ANOGA AGAP006260-PD (Z band alternatively spliced PDZ-motif protein 66, isoform I; mesoderm development) OS=Anopheles gambiae GN=AGAP006260 PE=4 SV=1Length=243	Score = 106 bits (265), Expect = 2e-021	No Hit		emb|AM107770.1| AM107770 Lutzomyia longipalpis Jacobina whole fly Lutzomyia longipalpis cDNA clone NSFM-85h05, mRNA sequence.Length=1196	Score = 606 bits (328), Expect = 3e-170
Contig17984	F1UMNMG01CHPZU	Length=268	tr|Q86BH6|Q86BH6_DROME Z band alternatively spliced PDZ-motif protein 66, isoform I (mesoderm development) OS=Drosophila melanogaster GN=Zasp66 PE=2 SV=1Length=215	Score = 73.2 bits (178), Expect = 2e-011	No Hit		emb|AM107766.1| AM107766 Lutzomyia longipalpis Jacobina whole fly Lutzomyia longipalpis cDNA clone NSFM-153e11, mRNA sequence.Length=1473	Score = 267 bits (144), Expect = 3e-068
Contig17585	F1UMNMG01CG0I7	Length=498	tr|Q7PS03|Q7PS03_ANOGA AGAP000579-PA (cholesterol transport) OS=Anopheles gambiae GN=AgaP_AGAP000579 PE=4 SV=5Length=1279	Score = 53.5 bits (127), Expect(2) = 6e-015	No Hit		No Hit
Contig17585	F1UMNMG01BLJ79	Length=495	tr|Q7PS03|Q7PS03_ANOGA AGAP000579-PA (cholesterol transport) OS=Anopheles gambiae GN=AgaP_AGAP000579 PE=4 SV=5Length=1279	Score = 53.5 bits (127), Expect(2) = 1e-010	No Hit		No Hit
Contig14207	F1UMNMG01CIJ19	Length=516	tr|H9JGA4|H9JGA4_BOMMO Uncharacterized protein (belongs to the heat shock protein 70 family) OS=Bombyx mori PE=4 SV=1Length=908	Score = 61.6 bits (148), Expect(2) = 4e-017	gb|AY144416.1| Ogcodes canadensis 28S ribosomal RNA gene, partial sequenceLength=1715	Score = 209 bits (113), Expect = 1e-050	emb|AM095113.1| AM095113 Lutzomyia longipalpis Jacobina whole fly Lutzomyia longipalpis cDNA clone SFM-01e11, mRNA sequence.Length=1107	Score = 442 bits (239), Expect = 1e-120
Contig14207	F1UMNMG01A4WJJ	Length=539	tr|Q7PYB0|Q7PYB0_ANOGA AGAP001827-PA (belongs to the heat shock protein 70 family) OS=Anopheles gambiae GN=AgaP_AGAP001827 PE=3 SV=3Length=968	Score = 155 bits (391), Expect(3) = 9e-051	No Hit		emb|AM095113.1| AM095113 Lutzomyia longipalpis Jacobina whole fly Lutzomyia longipalpis cDNA clone SFM-01e11, mRNA sequence.Length=1107	Score = 446 bits (241), Expect = 8e-122
Contig12345	F1UMNMG01BBJ15	Length=350	No Hit		No Hit		emb|AM097061.1| AM097061 Lutzomyia longipalpis Jacobina whole fly Lutzomyia longipalpis cDNA clone NSFM-05h02, mRNA sequence.Length=1142	Score = 219 bits (118), Expect = 1e-053
Contig12345	F1UMNMG01BUXZP	Length=610	No Hit		gb|AC240671.1| Lutzomyia longipalpis BAC CUGI_LL_CBa-97I08 complete sequenceLength=73113	Score = 313 bits (169), Expect = 1e-081	emb|AM097061.1| AM097061 Lutzomyia longipalpis Jacobina whole fly Lutzomyia longipalpis cDNA clone NSFM-05h02, mRNA sequence.Length=1142	Score = 340 bits (184), Expect = 4e-090
Contig10488	F1UMNMG01COQFW	Length=593	No Hit		No Hit		No Hit
Contig10488	F1UMNMG01A36JR	Length=542	No Hit		No Hit		emb|AM102137.1| AM102137 Lutzomyia longipalpis Jacobina whole fly Lutzomyia longipalpis cDNA clone NSFM-121e05, mRNA sequence.Length=1061	Score = 274 bits (148), Expect = 4e-070
Contig9755	F1UMNMG01AVRXN	Length=294	No Hit		No Hit		No Hit
Contig9695	F1UMNMG01AXEGR	Length=489	tr|B4Q7Y4|B4Q7Y4_DROSI GD21867 (Bicaudal-D_microtubule-assoc; BicD proteins are involved in dynein-mediated minus end-directed transport from the Golgi apparatus to the endoplasmic reticulum) OS=Drosophila simulans GN=GD21867 PE=4 SV=1Length=784	Score = 122 bits (305), Expect(2) = 2e-031	No Hit		No Hit
Contig9365	F1UMNMG01A3N9G	Length=461	No Hit		No Hit		gb|EW995639.1| LJGU-M-5_E01 Adult female Lutzomyia longipalpis midgut library sugar fed Lutzomyia longipalpis cDNA, mRNA sequence.Length=559	Score = 265 bits (143), Expect = 2e-067
Contig9179	F1UMNMG01CO03Z	Length=573	tr|B3MKY9|B3MKY9_DROAN GF14935 (Bicaudal C, isoform B; Contains 2 KH domains; the KH domain binds RNA, and can function in RNA recognition) OS=Drosophila ananassae GN=GF14935 PE=4 SV=1Length=938	Score = 77.8 bits (190), Expect = 1e-012	No Hit		No Hit
Contig8847	F1UMNMG01ATM4R	Length=339	No Hit		No Hit		gb|EW989297.1| LJGFIL2_E10 Adult female Lutzomyia longipalpis midgut library blood fed containing Leishmania chagasi Lutzomyia longipalpis cDNA, mRNA sequence.Length=968	Score = 379 bits (205), Expect = 5e-102
Contig870	F1UMNMG01BC7ZE	Length=424	No Hit		No Hit		No Hit
Contig8506	F1UMNMG01CIMU6	Length=418	tr|B4P902|B4P902_DROYA Domino (ATP binding; DNA binding; helicase activity) OS=Drosophila yakuba GN=dom PE=4 SV=1Length=3195	Score = 102 bits (253), Expect = 4e-020	No Hit		No Hit
Contig8325	F1UMNMG01CH1SP	Length=481	tr|H9IEF4|H9IEF4_ATTCE Uncharacterized protein (Multidrug resistance protein 2 [Atp-binding cassette protein c]) OS=Atta cephalotes PE=4 SV=1Length=1587	Score = 106 bits (265), Expect = 2e-021	No Hit		No Hit
Contig7838	F1UMNMG01BOQ4E	Length=527	tr|E3WM83|E3WM83_ANODA Putative uncharacterized protein (F-box only protein; protein ubiquitination) OS=Anopheles darlingi GN=AND_02054 PE=3 SV=1Length=1991	Score = 195 bits (495), Expect(2) = 4e-066	No Hit		gb|GW816392.1| PPRGFL_P4_D10 PPRGF Phlebotomus perniciosus cDNA, mRNA sequence.Length=977	Score = 531 bits (287), Expect = 2e-147
Contig7570	F1UMNMG01CDP7H	Length=474	No Hit		gb|AC240671.1| Lutzomyia longipalpis BAC CUGI_LL_CBa-97I08 complete sequenceLength=73113	Score = 307 bits (166), Expect = 4e-080	emb|AM098160.1| AM098160 Lutzomyia longipalpis Jacobina whole fly Lutzomyia longipalpis cDNA clone NSFM-11f05, mRNA sequence.Length=1097	Score = 315 bits (170), Expect = 2e-082
Contig7490	F1UMNMG01A5CM7	Length=584	No Hit		gb|AC240671.1| Lutzomyia longipalpis BAC CUGI_LL_CBa-97I08 complete sequenceLength=73113	Score = 294 bits (159), Expect = 4e-076	emb|AM097061.1| AM097061 Lutzomyia longipalpis Jacobina whole fly Lutzomyia longipalpis cDNA clone NSFM-05h02, mRNA sequence.Length=1142	Score = 305 bits (165), Expect = 2e-079
Contig7145	F1UMNMG01B82AB	Length=467	No Hit		No Hit		gb|EW995639.1| LJGU-M-5_E01 Adult female Lutzomyia longipalpis midgut library sugar fed Lutzomyia longipalpis cDNA, mRNA sequence.Length=559	Score = 248 bits (134), Expect = 2e-062
Contig7114	F1UMNMG01AOQSE	Length=501	No Hit		No Hit		No Hit
Contig6920	F1UMNMG01CM08G	Length=542	No Hit		gb|AC240671.1| Lutzomyia longipalpis BAC CUGI_LL_CBa-97I08 complete sequenceLength=73113	Score = 255 bits (138), Expect = 2e-064	emb|AM101241.1| AM101241 Lutzomyia longipalpis Jacobina whole fly Lutzomyia longipalpis cDNA clone NSFM-30d10, mRNA sequence.Length=1325	Score = 292 bits (158), Expect = 1e-075
Contig6702	F1UMNMG01A9KYQ	Length=579	No Hit		No Hit		emb|AM101241.1| AM101241 Lutzomyia longipalpis Jacobina whole fly Lutzomyia longipalpis cDNA clone NSFM-30d10, mRNA sequence.Length=1325	Score = 213 bits (115), Expect = 1e-051
Contig6640	F1UMNMG01BYPCI	Length=617	No Hit		gb|AC240669.2| Lutzomyia longipalpis BAC CUGI_LL_CBa-96F15 complete sequenceLength=83537	Score = 327 bits (177), Expect = 4e-086	No Hit
Contig6552	F1UMNMG01CNGQ6	Length=575	tr|Q291L7|Q291L7_DROPS GA21076 (CWC16; eukaryotic proteins with undetermined function belonging to the CWC16 family) OS=Drosophila pseudoobscura pseudoobscura GN=GA21076 PE=4 SV=2Length=319	Score = 130 bits (326), Expect = 2e-028	No Hit		emb|AM105291.1| AM105291 Lutzomyia longipalpis Jacobina whole fly Lutzomyia longipalpis cDNA clone NSFM-128a04, mRNA sequence.Length=1321	Score = 313 bits (169), Expect = 9e-082
Contig6481	F1UMNMG01BTPDW	Length=567	No Hit		gb|AC240671.1| Lutzomyia longipalpis BAC CUGI_LL_CBa-97I08 complete sequenceLength=73113	Score = 309 bits (167), Expect = 1e-080	emb|AM097061.1| AM097061 Lutzomyia longipalpis Jacobina whole fly Lutzomyia longipalpis cDNA clone NSFM-05h02, mRNA sequence.Length=1142	Score = 322 bits (174), Expect = 1e-084
Contig5923	F1UMNMG01BW859	Length=1259	No Hit		gb|AC240671.1| Lutzomyia longipalpis BAC CUGI_LL_CBa-97I08 complete sequenceLength=73113	Score = 254 bits (137), Expect = 2e-063	emb|AM101241.1| AM101241 Lutzomyia longipalpis Jacobina whole fly Lutzomyia longipalpis cDNA clone NSFM-30d10, mRNA sequence.Length=1325	Score = 340 bits (184), Expect = 9e-090
Contig5707	F1UMNMG01ANL1C	Length=511	No Hit		No Hit		No Hit
Contig5650	F1UMNMG01AY2BW	Length=408	No Hit		No Hit		emb|AM093850.1| AM093850 Lutzomyia longipalpis Jacobina whole fly Lutzomyia longipalpis cDNA clone NSFM-165d10, mRNA sequence.Length=1378	Score = 255 bits (138), Expect = 1e-064
Contig55	F1UMNMG01BN5OD	Length=573	No Hit		gb|AC240671.1| Lutzomyia longipalpis BAC CUGI_LL_CBa-97I08 complete sequenceLength=73113	Score = 257 bits (139), Expect = 5e-065	gb|EW989821.1| LJGFIL9_D02 Adult female Lutzomyia longipalpis midgut library blood fed containing Leishmania chagasi Lutzomyia longipalpis cDNA, mRNA sequence.Length=774	Score = 281 bits (152), Expect = 3e-072
Contig5378	F1UMNMG01BT42O	Length=530	tr|G7K0E5|G7K0E5_MEDTR Putative uncharacterized protein OS=Medicago truncatula GN=MTR_5g051150 PE=4 SV=1Length=2133	Score = 82.4 bits (202), Expect = 3e-014	gb|FJ040565.1| Lutzomyia longipalpis 28S ribosomal RNA gene, partial sequenceLength=2893	Score = 272 bits (147), Expect = 2e-069	emb|FP595913.1| FP595913 Hirudo medicinalis normalized library Hirudo medicinalis cDNA, mRNA sequence.Length=540	Score = 281 bits (152), Expect = 2e-072
Contig5109	F1UMNMG01COD2A	Length=535	tr|B4M8E2|B4M8E2_DROVI GJ16794 (zinc ion binding) OS=Drosophila virilis GN=GJ16794 PE=4 SV=1Length=5248	Score = 83.6 bits (205), Expect(3) = 9e-021	No Hit		No Hit
Contig5018	F1UMNMG01BUXQG	Length=661	No Hit		No Hit		No Hit
Contig4960	F1UMNMG01ANQ45	Length=487	No Hit		No Hit		No Hit
Contig4865	F1UMNMG01A27WJ	Length=491	No Hit		gb|JF714435.1| Lutzomyia longipalpis bromodomain and PHD finger-containing protein gene, partial cdsLength=3231	Score = 241 bits (130), Expect = 5e-060	emb|AM102138.1| AM102138 Lutzomyia longipalpis Jacobina whole fly Lutzomyia longipalpis cDNA clone NSFM-121e05, mRNA sequence.Length=1366	Score = 396 bits (214), Expect = 7e-107
Contig4537	F1UMNMG01APHP7	Length=342	No Hit		No Hit		No Hit
Contig444	F1UMNMG01BUSKD	Length=517	tr|D0UR85|D0UR85_ISCVE Glycogen synthase (Fragment) OS=Ischnura verticalis PE=2 SV=1Length=303	Score = 202 bits (514), Expect(2) = 7e-072	No Hit		emb|AM105247.1| AM105247 Lutzomyia longipalpis Jacobina whole fly Lutzomyia longipalpis cDNA clone NSFM-116b09, mRNA sequence.Length=1285	Score = 483 bits (261), Expect = 6e-133
Contig4116	F1UMNMG01BPRTM	Length=562	No Hit		No Hit		No Hit
Contig3896	F1UMNMG01CNPWR	Length=467	tr|B4N5X0|B4N5X0_DROWI Belongs to the sodium:neurotransmitter symporter (SNF) family; OS=Drosophila willistoni GN=GK17955 PE=3 SV=1Length=750	Score = 183 bits (465), Expect(2) = 8e-051	No Hit		No Hit
Contig3834	F1UMNMG01AY8DM	Length=499	tr|Q178E8|Q178E8_AEDAE ATP-binding cassette transporter OS=Aedes aegypti GN=AAEL005929 PE=3 SV=1Length=1413	Score = 133 bits (335), Expect(3) = 4e-043	No Hit		No Hit
Contig3796	F1UMNMG01BD3NC	Length=611	No Hit		No Hit		No Hit
Contig35622	F1UMNMG01B1B2H	Length=536	No Hit		gb|AC240671.1| Lutzomyia longipalpis BAC CUGI_LL_CBa-97I08 complete sequenceLength=73113	Score = 307 bits (166), Expect = 5e-080	emb|AM097061.1| AM097061 Lutzomyia longipalpis Jacobina whole fly Lutzomyia longipalpis cDNA clone NSFM-05h02, mRNA sequence.Length=1142	Score = 311 bits (168), Expect = 3e-081
Contig35572	F1UMNMG01BCBB9	Length=465	tr|H9HCJ2|H9HCJ2_ATTCE Uncharacterized protein (Nesprin-1 [nuclear envelope spectrin repeat]; Actin-binding) OS=Atta cephalotes PE=4 SV=1Length=7090	Score = 195 bits (495), Expect = 3e-048	No Hit		No Hit
Contig35571	F1UMNMG01BH4H0	Length=454	tr|H9HCJ2|H9HCJ2_ATTCE Uncharacterized protein (Nesprin-1 [nuclear envelope spectrin repeat]; Actin-binding) OS=Atta cephalotes PE=4 SV=1Length=7090	Score = 65.9 bits (159), Expect(2) = 3e-018	No Hit		No Hit
Contig3525	F1UMNMG01BLH07	Length=410	No Hit		No Hit		emb|AM106486.1| AM106486 Lutzomyia longipalpis Jacobina whole fly Lutzomyia longipalpis cDNA clone NSFM-41d08, mRNA sequence.Length=1343	Score = 536 bits (290), Expect = 3e-149
Contig35212	F1UMNMG01BXU87	Length=279	No Hit		gb|AC240671.1| Lutzomyia longipalpis BAC CUGI_LL_CBa-97I08 complete sequenceLength=73113	Score = 246 bits (133), Expect = 5e-062	emb|AM101241.1| AM101241 Lutzomyia longipalpis Jacobina whole fly Lutzomyia longipalpis cDNA clone NSFM-30d10, mRNA sequence.Length=1325	Score = 268 bits (145), Expect = 9e-069
Contig34993	F1UMNMG01B1P9L	Length=509	No Hit		gb|AC240671.1| Lutzomyia longipalpis BAC CUGI_LL_CBa-97I08 complete sequenceLength=73113	Score = 294 bits (159), Expect = 4e-076	emb|AM101240.1| AM101240 Lutzomyia longipalpis Jacobina whole fly Lutzomyia longipalpis cDNA clone NSFM-30d10, mRNA sequence.Length=1091	Score = 300 bits (162), Expect = 6e-078
Contig34935	F1UMNMG01BZT0I	Length=496	tr|H9HCC6|H9HCC6_ATTCE Uncharacterized protein (Fragment) (protein serine/threonine kinase activity; ATP binding) OS=Atta cephalotes PE=4 SV=1Length=705	Score = 214 bits (546), Expect = 4e-054	No Hit		No Hit
Contig34912	F1UMNMG01BKZGS	Length=564	tr|Q94977|Q94977_LUCCU PC2-like prohormone convertase (Belongs to the peptidase S8 family; proteolysis; serine-type endopeptidase activity) OS=Lucilia cuprina PE=2 SV=1Length=675	Score = 72.4 bits (176), Expect = 4e-011	No Hit		No Hit
Contig34911	F1UMNMG01A8UPG	Length=564	No Hit		No Hit		No Hit
Contig3422	F1UMNMG01B5IL8	Length=394	No Hit		gb|AC240671.1| Lutzomyia longipalpis BAC CUGI_LL_CBa-97I08 complete sequenceLength=73113	Score = 257 bits (139), Expect = 4e-065	emb|AM101241.1| AM101241 Lutzomyia longipalpis Jacobina whole fly Lutzomyia longipalpis cDNA clone NSFM-30d10, mRNA sequence.Length=1325	Score = 287 bits (155), Expect = 4e-074
Contig33946	F1UMNMG01A6MJ0	Length=758	No Hit		No Hit		No Hit
Contig33875	F1UMNMG01AXQRI	Length=486	tr|Q17BQ6|Q17BQ6_AEDAE Cyclin g OS=Aedes aegypti GN=AAEL004865 PE=3 SV=1Length=476	Score = 99.0 bits (245), Expect(2) = 2e-035	No Hit		emb|AM092776.1| AM092776 Lutzomyia longipalpis Jacobina whole fly Lutzomyia longipalpis cDNA clone NSFM-43a02, mRNA sequence.Length=1110	Score = 715 bits (387), Expect = 0.0
Contig33295	F1UMNMG01B7AXM	Length=511	tr|B4JYB4|B4JYB4_DROGR GH14264 (Serine/threonine-protein phosphatase 4 regulatory subunit) OS=Drosophila grimshawi GN=GH14264 PE=4 SV=1Length=1040	Score = 114 bits (286), Expect(2) = 9e-046	No Hit		gb|EX211972.1| ALYTINFA04F04 Lutzomyia longipalpis Infected Lutzomyia longipalpis cDNA 5', mRNA sequence.Length=659	Score = 819 bits (443), Expect = 0.0
Contig33264	F1UMNMG01A4VKJ	Length=571	No Hit		gb|AC240671.1| Lutzomyia longipalpis BAC CUGI_LL_CBa-97I08 complete sequenceLength=73113	Score = 285 bits (154), Expect = 3e-073	emb|AM101241.1| AM101241 Lutzomyia longipalpis Jacobina whole fly Lutzomyia longipalpis cDNA clone NSFM-30d10, mRNA sequence.Length=1325	Score = 327 bits (177), Expect = 3e-086
Contig32976	F1UMNMG01BTZ01	Length=524	tr|Q16UP6|Q16UP6_AEDAE Putative uncharacterized protein (Fragment) (Dpr7, isoform D; sensory perception of chemical stimulus) OS=Aedes aegypti GN=AAEL009841 PE=4 SV=1Length=200	Score = 117 bits (292), Expect = 1e-024	No Hit		emb|AM090009.1| AM090009 Lutzomyia longipalpis Jacobina whole fly Lutzomyia longipalpis cDNA clone NSFM-20g09, mRNA sequence.Length=1209	Score = 702 bits (380), Expect = 0.0
Contig32940	F1UMNMG01B6WN7	Length=472	tr|E1JHJ5|E1JHJ5_DROME Myosin heavy chain, isoform P OS=Drosophila melanogaster GN=Mhc PE=4 SV=1Length=1949	Score = 219 bits (559), Expect = 1e-055	ref|XM_001651338.1| Aedes aegypti myosin heavy chain, nonmuscle or smooth muscle partial mRNALength=7309	Score = 496 bits (268), Expect = 9e-137	emb|AM109365.1| AM109365 Lutzomyia longipalpis Jacobina whole fly Lutzomyia longipalpis cDNA clone NSFM-35c06, mRNA sequence.Length=1239	Score = 815 bits (441), Expect = 0.0
Contig32134	F1UMNMG01CDEYK	Length=497	tr|B0W4H2|B0W4H2_CULQU Myosin-VIIa OS=Culex quinquefasciatus GN=CpipJ_CPIJ001741 PE=4 SV=1Length=2076	Score = 137 bits (345), Expect(2) = 5e-059	No Hit		No Hit
Contig31004	F1UMNMG01BUSUW	Length=417	tr|Q171S2|Q171S2_AEDAE Vacuolar protein sorting-associated protein (Vps13d) (Fragment); Proteins in this entry may play a role in the control of protein cycling through the trans-Golgi network OS=Aedes aegypti GN=AAEL007551 PE=4 SV=1Length=3926	Score = 122 bits (307), Expect = 2e-026	No Hit		No Hit
Contig30997	F1UMNMG01BY220	Length=506	No Hit		No Hit		emb|AM098160.1| AM098160 Lutzomyia longipalpis Jacobina whole fly Lutzomyia longipalpis cDNA clone NSFM-11f05, mRNA sequence.Length=1097	Score = 241 bits (130), Expect = 4e-060
Contig30839	F1UMNMG01A23S1	Length=596	No Hit		No Hit		gb|EW995639.1| LJGU-M-5_E01 Adult female Lutzomyia longipalpis midgut library sugar fed Lutzomyia longipalpis cDNA, mRNA sequence.Length=559	Score = 235 bits (127), Expect = 2e-058
Contig30706	F1UMNMG01A0EUJ	Length=586	No Hit		No Hit		No Hit
Contig30690	F1UMNMG01B6SRG	Length=504	tr|B4MYN1|B4MYN1_DROWI Elongation factor 1-alpha (Protein biosynthesis) OS=Drosophila willistoni GN=GK22048 PE=3 SV=1Length=463	Score = 195 bits (495), Expect = 3e-048	gb|JQ638952.1| Bombyx mori elongation factor 1 alpha mRNA, complete cdsLength=3164	Score = 296 bits (160), Expect = 1e-076	emb|AM097515.1| AM097515 Lutzomyia longipalpis Jacobina whole fly Lutzomyia longipalpis cDNA clone NSFM-98c09, mRNA sequence.Length=956	Score = 843 bits (456), Expect = 0.0
Contig30505	F1UMNMG01BK1L1	Length=570	No Hit		No Hit		gb|EW995639.1| LJGU-M-5_E01 Adult female Lutzomyia longipalpis midgut library sugar fed Lutzomyia longipalpis cDNA, mRNA sequence.Length=559	Score = 235 bits (127), Expect = 2e-058
Contig29936	F1UMNMG01B3NY4	Length=1536	No Hit		No Hit		emb|AM101241.1| AM101241 Lutzomyia longipalpis Jacobina whole fly Lutzomyia longipalpis cDNA clone NSFM-30d10, mRNA sequence.Length=1325	Score = 226 bits (122), Expect = 3e-055
Contig2993	F1UMNMG01A5ZOF	Length=424	No Hit		No Hit		emb|AM101240.1| AM101240 Lutzomyia longipalpis Jacobina whole fly Lutzomyia longipalpis cDNA clone NSFM-30d10, mRNA sequence.Length=1091	Score = 281 bits (152), Expect = 2e-072
Contig29662	F1UMNMG01APHOY	Length=475	No Hit		gb|AC240671.1| Lutzomyia longipalpis BAC CUGI_LL_CBa-97I08 complete sequenceLength=73113	Score = 230 bits (124), Expect = 1e-056	emb|AM101241.1| AM101241 Lutzomyia longipalpis Jacobina whole fly Lutzomyia longipalpis cDNA clone NSFM-30d10, mRNA sequence.Length=1325	Score = 279 bits (151), Expect = 8e-072
Contig29430	F1UMNMG01CNE97	Length=543	No Hit		No Hit		gb|EW995639.1| LJGU-M-5_E01 Adult female Lutzomyia longipalpis midgut library sugar fed Lutzomyia longipalpis cDNA, mRNA sequence.Length=559	Score = 233 bits (126), Expect = 7e-058
Contig29342	F1UMNMG01A75GZ	Length=331	tr|B0W745|B0W745_CULQU Retinoid-inducible serine carboxypeptidase (proteolysis) OS=Culex quinquefasciatus GN=CpipJ_CPIJ002911 PE=4 SV=1Length=446	Score = 134 bits (337), Expect = 7e-030	No Hit		emb|AM098344.1| AM098344 Lutzomyia longipalpis Jacobina whole fly Lutzomyia longipalpis cDNA clone NSFM-83a06, mRNA sequence.Length=1156	Score = 424 bits (229), Expect = 2e-115
Contig29322	F1UMNMG01AVT0H	Length=871	No Hit		No Hit		No Hit
Contig29248	F1UMNMG01BYZ3V	Length=451	No Hit		No Hit		No Hit
Contig28934	F1UMNMG01CBR3L	Length=488	tr|Q16KW5|Q16KW5_AEDAE Forkhead box, sub-group O, putative (transcription factor) OS=Aedes aegypti GN=AAEL012847 PE=4 SV=1Length=403	Score = 196 bits (497), Expect = 2e-048	No Hit		No Hit
Contig28677	F1UMNMG01BDORY	Length=509	tr|B0WEB3|B0WEB3_CULQU Fatty acid synthase S-acetyltransferase (biosynthetic process) OS=Culex quinquefasciatus GN=CpipJ_CPIJ005595 PE=4 SV=1Length=2419	Score = 74.7 bits (182), Expect(2) = 1e-014	No Hit		emb|AM105896.1| AM105896 Lutzomyia longipalpis Jacobina whole fly Lutzomyia longipalpis cDNA clone NSFM-106f09, mRNA sequence.Length=1346	Score = 614 bits (332), Expect = 2e-172
Contig28581	F1UMNMG01CHSBJ	Length=444	tr|Q17F22|Q17F22_AEDAE Purine biosynthesis protein 6, pur6 ('de novo' IMP biosynthetic process) OS=Aedes aegypti GN=AAEL003606 PE=4 SV=1Length=427	Score = 187 bits (475), Expect = 7e-046	No Hit		emb|AM103237.1| AM103237 Lutzomyia longipalpis Jacobina whole fly Lutzomyia longipalpis cDNA clone NSFM-118c03, mRNA sequence.Length=1400	Score = 623 bits (337), Expect = 3e-175
Contig28541	F1UMNMG01BM2MQ	Length=546	tr|B3N0J2|B3N0J2_DROAN GF21709 (Microsomal glutathione S-transferase-like, isoform B; MAPEG-like_dom; This domain is found in a widespread superfamily known as MAPEG (Membrane Associated Proteins in Eicosanoid and Glutathione metabolism) OS=Drosophila ananassae GN=GF21709 PE=4 SV=1Length=195	Score = 109 bits (272), Expect = 3e-022	No Hit		gb|EW990920.1| LJGFIS32_F12 Adult female Lutzomyia longipalpis midgut library blood fed containing Leishmania chagasi Lutzomyia longipalpis cDNA, mRNA sequence.Length=600	Score = 545 bits (295), Expect = 8e-152
Contig28381	F1UMNMG01B7YHP	Length=477	No Hit		No Hit		No Hit
Contig28177	F1UMNMG01BS7X2	Length=542	tr|Q7PVH2|Q7PVH2_ANOGA AGAP009278-PA (Phosphorylase b kinase beta; glycogen metabolic process) OS=Anopheles gambiae GN=AGAP009278 PE=4 SV=4Length=1065	Score = 125 bits (314), Expect = 4e-027	gb|AC240671.1| Lutzomyia longipalpis BAC CUGI_LL_CBa-97I08 complete sequenceLength=73113	Score = 285 bits (154), Expect = 2e-073	emb|AM098160.1| AM098160 Lutzomyia longipalpis Jacobina whole fly Lutzomyia longipalpis cDNA clone NSFM-11f05, mRNA sequence.Length=1097	Score = 316 bits (171), Expect = 7e-083
Contig2800	F1UMNMG01CPWQT	Length=316	No Hit		No Hit		gb|EW989176.1| LJGFIL10_A02 Adult female Lutzomyia longipalpis midgut library blood fed containing Leishmania chagasi Lutzomyia longipalpis cDNA, mRNA sequence.Length=835	Score = 453 bits (245), Expect = 3e-124
Contig27841	F1UMNMG01B2P8G	Length=544	No Hit		No Hit		No Hit
Contig27781	F1UMNMG01ANXVR	Length=340	tr|Q16KT4|Q16KT4_AEDAE Putative uncharacterized protein (COPII vesicle coating; the addition of COPII proteins and adaptor proteins to ER membranes during the formation of transport vesicles, forming a vesicle coat) OS=Aedes aegypti GN=AAEL012880 PE=4 SV=1Length=802	Score = 104 bits (260), Expect = 6e-021	No Hit		No Hit
Contig27738	F1UMNMG01BSGWG	Length=396	No Hit		gb|AC240671.1| Lutzomyia longipalpis BAC CUGI_LL_CBa-97I08 complete sequenceLength=73113	Score = 313 bits (169), Expect = 8e-082	emb|AM097061.1| AM097061 Lutzomyia longipalpis Jacobina whole fly Lutzomyia longipalpis cDNA clone NSFM-05h02, mRNA sequence.Length=1142	Score = 318 bits (172), Expect = 1e-083
Contig27608	F1UMNMG01B4XG8	Length=526	No Hit		gb|AC240671.1| Lutzomyia longipalpis BAC CUGI_LL_CBa-97I08 complete sequenceLength=73113	Score = 244 bits (132), Expect = 4e-061	emb|AM101399.1| AM101399 Lutzomyia longipalpis Jacobina whole fly Lutzomyia longipalpis cDNA clone NSFM-125c11, mRNA sequence.Length=1413	Score = 270 bits (146), Expect = 5e-069
Contig27281	F1UMNMG01B7VQJ	Length=501	tr|Q7Q8C2|Q7Q8C2_ANOGA AGAP008698-PA (Fragment) (Chromodomain-helicase-DNA-binding protein 1; ATP-dependent helicase activity, DNA binding, ATP binding) OS=Anopheles gambiae GN=AGAP008698 PE=4 SV=4Length=2083	Score = 138 bits (348), Expect = 4e-031	No Hit		No Hit
Contig27098	F1UMNMG01CAWK2	Length=500	No Hit		No Hit		emb|AM095844.1| AM095844 Lutzomyia longipalpis Jacobina whole fly Lutzomyia longipalpis cDNA clone NSFM-163d12, mRNA sequence.Length=1316	Score = 566 bits (306), Expect = 5e-158
Contig26867	F1UMNMG01B1OLX	Length=495	tr|G8FU55|G8FU55_APIME Hunchback (Znf_C2H2/integrase_DNA-bd; this entry represents the C2H2-type zinc finger domain [11], as well as the DNA-binding domain of certain integrases) OS=Apis mellifera GN=hb PE=2 SV=1Length=646	Score = 180 bits (456), Expect = 1e-043	No Hit		emb|AM090886.1| AM090886 Lutzomyia longipalpis Jacobina whole fly Lutzomyia longipalpis cDNA clone NSFM-21c03, mRNA sequence.Length=1260	Score = 582 bits (315), Expect = 5e-163
Contig26764	F1UMNMG01A04BJ	Length=538	tr|D3TMM8|D3TMM8_GLOMM Ras suppressor protein (This gene encodes a protein that is involved in the Ras signal transduction pathway, growth inhibition, and nerve-growth factor induced differentiation processes) OS=Glossina morsitans morsitans PE=2 SV=1Length=289	Score = 182 bits (463), Expect(3) = 3e-067	No Hit		emb|AM093599.1| AM093599 Lutzomyia longipalpis Jacobina whole fly Lutzomyia longipalpis cDNA clone NSFM-01d12, mRNA sequence.Length=1022	Score = 850 bits (460), Expect = 0.0
Contig26736	F1UMNMG01BQS9X	Length=578	No Hit		No Hit		gb|EW995639.1| LJGU-M-5_E01 Adult female Lutzomyia longipalpis midgut library sugar fed Lutzomyia longipalpis cDNA, mRNA sequence.Length=559	Score = 259 bits (140), Expect = 1e-065
Contig26704	F1UMNMG01CE54U	Length=507	No Hit		No Hit		No Hit
Contig26611	F1UMNMG01APBDT	Length=500	tr|Q7QHI8|Q7QHI8_ANOGA AGAP011201-PA (Fragment) (TLC-dom; Transmembrane helix; Proteins containing this domain may possess multiple functions such as lipid trafficking, metabolism, or sensing) OS=Anopheles gambiae GN=AGAP011201 PE=4 SV=4Length=113	Score = 65.5 bits (158), Expect(2) = 4e-021	No Hit		gb|EW993169.1| LJGDIM22_F05 Adult female Lutzomyia longipalpis midgut library post blood meal digestion containing Leishmania chagasi Lutzomyia longipalpis cDNA, mRNA sequence.Length=1045	Score = 795 bits (430), Expect = 0.0
Contig26610	F1UMNMG01BRP8X	Length=574	No Hit		No Hit		No Hit
Contig26497	F1UMNMG01BTNRK	Length=552	No Hit		gb|AC240671.1| Lutzomyia longipalpis BAC CUGI_LL_CBa-97I08 complete sequenceLength=73113	Score = 211 bits (114), Expect = 4e-051	emb|AM101399.1| AM101399 Lutzomyia longipalpis Jacobina whole fly Lutzomyia longipalpis cDNA clone NSFM-125c11, mRNA sequence.Length=1413	Score = 230 bits (124), Expect = 9e-057
Contig2647	F1UMNMG01CH78C	Length=563	No Hit		gb|AC240671.1| Lutzomyia longipalpis BAC CUGI_LL_CBa-97I08 complete sequenceLength=73113	Score = 315 bits (170), Expect = 3e-082	emb|AM097061.1| AM097061 Lutzomyia longipalpis Jacobina whole fly Lutzomyia longipalpis cDNA clone NSFM-05h02, mRNA sequence.Length=1142	Score = 326 bits (176), Expect = 1e-085
Contig26442	F1UMNMG01AXR9S	Length=502	No Hit		No Hit		No Hit
Contig26071	F1UMNMG01AY59V	Length=511	No Hit		No Hit		No Hit
Contig25986	F1UMNMG01BK71K	Length=388	No Hit		gb|AC240671.1| Lutzomyia longipalpis BAC CUGI_LL_CBa-97I08 complete sequenceLength=73113	Score = 302 bits (163), Expect = 2e-078	emb|AM097061.1| AM097061 Lutzomyia longipalpis Jacobina whole fly Lutzomyia longipalpis cDNA clone NSFM-05h02, mRNA sequence.Length=1142	Score = 291 bits (157), Expect = 3e-075
Contig25566	F1UMNMG01B4WQ2	Length=558	tr|B4PJH9|B4PJH9_DROYA Dihydrolipoyl dehydrogenase, belongs to the class-I pyridine nucleotide-disulfide oxidoreductase family (cell redox homeostasis) OS=Drosophila yakuba GN=GE19931 PE=3 SV=1Length=504	Score = 216 bits (551), Expect = 1e-054	No Hit		emb|AM103935.1| AM103935 Lutzomyia longipalpis Jacobina whole fly Lutzomyia longipalpis cDNA clone NSFM-57h11, mRNA sequence.Length=1201	Score = 900 bits (487), Expect = 0.0
Contig25449	F1UMNMG01BJVW1	Length=449	No Hit		gb|AC240671.1| Lutzomyia longipalpis BAC CUGI_LL_CBa-97I08 complete sequenceLength=73113	Score = 239 bits (129), Expect = 2e-059	gb|EW989821.1| LJGFIL9_D02 Adult female Lutzomyia longipalpis midgut library blood fed containing Leishmania chagasi Lutzomyia longipalpis cDNA, mRNA sequence.Length=774	Score = 270 bits (146), Expect = 4e-069
Contig25058	F1UMNMG01CG15R	Length=344	No Hit		gb|AC240671.1| Lutzomyia longipalpis BAC CUGI_LL_CBa-97I08 complete sequenceLength=73113	Score = 270 bits (146), Expect = 4e-069	emb|AM101241.1| AM101241 Lutzomyia longipalpis Jacobina whole fly Lutzomyia longipalpis cDNA clone NSFM-30d10, mRNA sequence.Length=1325	Score = 307 bits (166), Expect = 2e-080
Contig24973	F1UMNMG01BRF00	Length=581	No Hit		No Hit		No Hit
Contig24571	F1UMNMG01CCYPC	Length=535	No Hit		No Hit		No Hit
Contig24426	F1UMNMG01BBCMG	Length=522	No Hit		No Hit		No Hit
Contig24422	F1UMNMG01AZIBO	Length=487	tr|B0W404|B0W404_CULQU Chorion peroxidase (response to oxidative stress) OS=Culex quinquefasciatus GN=CpipJ_CPIJ001764 PE=4 SV=1Length=685	Score = 160 bits (404), Expect = 1e-037	No Hit		emb|AM104644.1| AM104644 Lutzomyia longipalpis Jacobina whole fly Lutzomyia longipalpis cDNA clone NSFM-65e06, mRNA sequence.Length=1281	Score = 737 bits (399), Expect = 0.0
Contig24258	F1UMNMG01BZGBR	Length=490	tr|B0W015|B0W015_CULQU Serine-type protease inhibitor (proteolysis) OS=Culex quinquefasciatus GN=CpipJ_CPIJ000379 PE=4 SV=1Length=1032	Score = 74.3 bits (181), Expect = 9e-012	No Hit		No Hit
Contig24012	F1UMNMG01CNG83	Length=363	No Hit		gb|AC240671.1| Lutzomyia longipalpis BAC CUGI_LL_CBa-97I08 complete sequenceLength=73113	Score = 219 bits (118), Expect = 2e-053	No Hit
Contig23764	F1UMNMG01A54OL	Length=563	No Hit		gb|AC240671.1| Lutzomyia longipalpis BAC CUGI_LL_CBa-97I08 complete sequenceLength=73113	Score = 316 bits (171), Expect = 9e-083	emb|AM097061.1| AM097061 Lutzomyia longipalpis Jacobina whole fly Lutzomyia longipalpis cDNA clone NSFM-05h02, mRNA sequence.Length=1142	Score = 324 bits (175), Expect = 4e-085
Contig23521	F1UMNMG01BUNQJ	Length=506	tr|Q16KZ7|Q16KZ7_AEDAE Transcription factor E2f, putative (DE2F) (transcription, DNA-dependent) OS=Aedes aegypti GN=AAEL012817 PE=3 SV=1Length=662	Score = 68.2 bits (165), Expect = 6e-010	No Hit		emb|AM095029.1| AM095029 Lutzomyia longipalpis Jacobina whole fly Lutzomyia longipalpis cDNA clone NSFM-35h06, mRNA sequence.Length=1235	Score = 492 bits (266), Expect = 1e-135
Contig23452	F1UMNMG01B1X4T	Length=586	No Hit		No Hit		No Hit
Contig23288	F1UMNMG01BL95V	Length=469	tr|Q16T27|Q16T27_AEDAE Beclin ( autophagy, the process in which cells digest parts of their own cytoplasm; allows for both recycling of macromolecular constituents under conditions of cellular stress and remodeling the intracellular structure for cell differentiation) OS=Aedes aegypti GN=AAEL010427 PE=4 SV=1Length=426	Score = 169 bits (427), Expect = 3e-040	No Hit		emb|AM092621.1| AM092621 Lutzomyia longipalpis Jacobina whole fly Lutzomyia longipalpis cDNA clone NSFM-135a04, mRNA sequence.Length=1356	Score = 673 bits (364), Expect = 0.0
Contig23188	F1UMNMG01A3VX0	Length=370	No Hit		gb|AC240671.1| Lutzomyia longipalpis BAC CUGI_LL_CBa-97I08 complete sequenceLength=73113	Score = 241 bits (130), Expect = 3e-060	emb|AM097061.1| AM097061 Lutzomyia longipalpis Jacobina whole fly Lutzomyia longipalpis cDNA clone NSFM-05h02, mRNA sequence.Length=1142	Score = 285 bits (154), Expect = 1e-073
Contig23004	F1UMNMG01B528B	Length=544	No Hit		No Hit		No Hit
Contig22934	F1UMNMG01BJSE2	Length=458	tr|E3WN74|E3WN74_ANODA Putative uncharacterized protein (SH3 domain-binding protein 5 (SH3BP5); the SH3 domain-binding protein inhibits the auto and transphophorylation of BTK and acts as a negative regulator of BTK-related signalling in B cells; is involved in JNK cascade, a cascade of protein kinase activities, culminating in the phosphorylation and activation of a member of the JUN kinase subf…	Score = 84.0 bits (206), Expect(2) = 1e-024	No Hit		No Hit
Contig22837	F1UMNMG01CLESE	Length=524	No Hit		gb|AC240671.1| Lutzomyia longipalpis BAC CUGI_LL_CBa-97I08 complete sequenceLength=73113	Score = 691 bits (374), Expect = 0.0	emb|AM095936.1| AM095936 Lutzomyia longipalpis Jacobina whole fly Lutzomyia longipalpis cDNA clone NSFM-56a05, mRNA sequence.Length=1277	Score = 595 bits (322), Expect = 7e-167
Contig22698	F1UMNMG01BFRXP	Length=315	No Hit		gb|AC240671.1| Lutzomyia longipalpis BAC CUGI_LL_CBa-97I08 complete sequenceLength=73113	Score = 254 bits (137), Expect = 4e-064	emb|AM101241.1| AM101241 Lutzomyia longipalpis Jacobina whole fly Lutzomyia longipalpis cDNA clone NSFM-30d10, mRNA sequence.Length=1325	Score = 329 bits (178), Expect = 5e-087
Contig22415	F1UMNMG01BTTS2	Length=509	No Hit		No Hit		No Hit
Contig22354	F1UMNMG01AVUI9	Length=405	No Hit		gb|AC240671.1| Lutzomyia longipalpis BAC CUGI_LL_CBa-97I08 complete sequenceLength=73113	Score = 257 bits (139), Expect = 4e-065	emb|AM101241.1| AM101241 Lutzomyia longipalpis Jacobina whole fly Lutzomyia longipalpis cDNA clone NSFM-30d10, mRNA sequence.Length=1325	Score = 292 bits (158), Expect = 8e-076
Contig22047	F1UMNMG01AV5TV	Length=510	No Hit		No Hit		No Hit
Contig21991	F1UMNMG01AWE45	Length=526	No Hit		No Hit		No Hit
Contig21696	F1UMNMG01BF3YC	Length=608	No Hit		gb|AC240671.1| Lutzomyia longipalpis BAC CUGI_LL_CBa-97I08 complete sequenceLength=73113	Score = 281 bits (152), Expect = 3e-072	emb|AM101240.1| AM101240 Lutzomyia longipalpis Jacobina whole fly Lutzomyia longipalpis cDNA clone NSFM-30d10, mRNA sequence.Length=1091	Score = 337 bits (182), Expect = 6e-089
Contig21255	F1UMNMG01CD8GK	Length=511	tr|Q16MH2|Q16MH2_AEDAE Putative uncharacterized protein (Anoctamin; This family contains the anoctamin/TMEM16 proteins which are thought to be calcium-dependent chloride channel) OS=Aedes aegypti GN=AAEL012293 PE=4 SV=1Length=863	Score = 64.7 bits (156), Expect(4) = 1e-026	No Hit		gb|ES348556.1| PPINFM-P7-E11 P. papatasi adult female blood fed with L. major midgut library Phlebotomus papatasi cDNA, mRNA sequence.Length=600	Score = 353 bits (191), Expect = 5e-094
Contig21135	F1UMNMG01CBJU7	Length=674	No Hit		No Hit		No Hit
Contig20905	F1UMNMG01A7K9H	Length=502	tr|Q0IFH5|Q0IFH5_AEDAE Phd finger protein (Zinc_finger_PHD-type_CS; this entry represents the PHD (homeodomain) zinc finger domain, which is a C4HC3 zinc-finger-like motif found in nuclear proteins thought to be involved in chromatin-mediated transcriptional regulation) OS=Aedes aegypti GN=AAEL004834 PE=4 SV=1Length=2274	Score = 73.9 bits (180), Expect = 1e-011	No Hit		No Hit
Contig2085	F1UMNMG01BSRJP	Length=535	No Hit		No Hit		No Hit
Contig20345	F1UMNMG01BOIY0	Length=621	No Hit		No Hit		emb|AM101241.1| AM101241 Lutzomyia longipalpis Jacobina whole fly Lutzomyia longipalpis cDNA clone NSFM-30d10, mRNA sequence.Length=1325	Score = 226 bits (122), Expect = 1e-055
Contig19908	F1UMNMG01B0XAO	Length=533	tr|Q17F89|Q17F89_AEDAE Putative uncharacterized protein (Fragment) (Zinc finger, C2H2-like; This entry represents the classical C2H2 zinc finger domain; Zinc finger (Znf) domains are now recognised to bind DNA, RNA, protein and/or lipid substrates) OS=Aedes aegypti GN=AAEL003489 PE=4 SV=1Length=781	Score = 54.3 bits (129), Expect(2) = 4e-007	No Hit		emb|AM106700.1| AM106700 Lutzomyia longipalpis Jacobina whole fly Lutzomyia longipalpis cDNA clone NSFM-95f09, mRNA sequence.Length=1281	Score = 209 bits (113), Expect = 1e-050
Contig19798	F1UMNMG01A3UUY	Length=290	No Hit		No Hit		gb|EW995639.1| LJGU-M-5_E01 Adult female Lutzomyia longipalpis midgut library sugar fed Lutzomyia longipalpis cDNA, mRNA sequence.Length=559	Score = 244 bits (132), Expect = 2e-061
Contig19763	F1UMNMG01B6X66	Length=632	No Hit		gb|AC240671.1| Lutzomyia longipalpis BAC CUGI_LL_CBa-97I08 complete sequenceLength=73113	Score = 207 bits (112), Expect = 6e-050	emb|AM101399.1| AM101399 Lutzomyia longipalpis Jacobina whole fly Lutzomyia longipalpis cDNA clone NSFM-125c11, mRNA sequence.Length=1413	Score = 270 bits (146), Expect = 6e-069
Contig19724	F1UMNMG01AS9IU	Length=667	No Hit		No Hit		No Hit
Contig19657	F1UMNMG01CHQ7L	Length=522	No Hit		gb|AC240671.1| Lutzomyia longipalpis BAC CUGI_LL_CBa-97I08 complete sequenceLength=73113	Score = 241 bits (130), Expect = 5e-060	emb|AM101241.1| AM101241 Lutzomyia longipalpis Jacobina whole fly Lutzomyia longipalpis cDNA clone NSFM-30d10, mRNA sequence.Length=1325	Score = 279 bits (151), Expect = 8e-072
Contig1916	F1UMNMG01B83GT	Length=512	tr|F1NGA2|F1NGA2_CHICK ATP synthase subunit alpha (Fragment) (ATP hydrolysis and synthesis coupled proton transport) OS=Gallus gallus GN=ATP5A1 PE=3 SV=1Length=555	Score = 263 bits (671), Expect(2) = 1e-068	ref|XM_001976257.1| Drosophila erecta GG22793 (Dere\GG22793), mRNALength=1659	Score = 496 bits (268), Expect = 1e-136	emb|AM089288.1| AM089288 Lutzomyia longipalpis Jacobina whole fly Lutzomyia longipalpis cDNA clone NSFM-05b11, mRNA sequence.Length=1177	Score = 852 bits (461), Expect = 0.0
Contig18462	F1UMNMG01BL9LK	Length=600	No Hit		No Hit		No Hit
Contig17834	F1UMNMG01APER7	Length=580	No Hit		gb|AC240671.1| Lutzomyia longipalpis BAC CUGI_LL_CBa-97I08 complete sequenceLength=73113	Score = 248 bits (134), Expect = 3e-062	emb|AM098160.1| AM098160 Lutzomyia longipalpis Jacobina whole fly Lutzomyia longipalpis cDNA clone NSFM-11f05, mRNA sequence.Length=1097	Score = 274 bits (148), Expect = 4e-070
Contig17549	F1UMNMG01BM7KW	Length=504	tr|Q1HQV5|Q1HQV5_AEDAE Mitochondrial aldehyde dehydrogenase (oxidoreductase activity, acting on the aldehyde or oxo group of donors, NAD or NADP as acceptor) OS=Aedes aegypti PE=2 SV=1Length=516	Score = 182 bits (463), Expect(2) = 1e-057	No Hit		emb|AM100213.1| AM100213 Lutzomyia longipalpis Jacobina whole fly Lutzomyia longipalpis cDNA clone NSFM-149b07, mRNA sequence.Length=1181	Score = 760 bits (411), Expect = 0.0
Contig17546	F1UMNMG01AZIHV	Length=485	tr|Q7PMK0|Q7PMK0_ANOGA AGAP010767-PA (Fragment) (intracellular signal transduction; regulation of Rho protein signal transduction; termination of G-protein coupled receptor signaling pathway; The members of the Rho GTPase family have been shown to regulate many aspects of intracellular actin dynamics, have been described as "molecular switches" and play a role in cell proliferation, apoptosis, ge…	Score = 67.0 bits (162), Expect = 1e-009	No Hit		No Hit
Contig17419	F1UMNMG01ASFWP	Length=486	No Hit		gb|AC240671.1| Lutzomyia longipalpis BAC CUGI_LL_CBa-97I08 complete sequenceLength=73113	Score = 252 bits (136), Expect = 2e-063	emb|AM101241.1| AM101241 Lutzomyia longipalpis Jacobina whole fly Lutzomyia longipalpis cDNA clone NSFM-30d10, mRNA sequence.Length=1325	Score = 294 bits (159), Expect = 3e-076
Contig17349	F1UMNMG01AP4UM	Length=434	No Hit		No Hit		gb|EW995639.1| LJGU-M-5_E01 Adult female Lutzomyia longipalpis midgut library sugar fed Lutzomyia longipalpis cDNA, mRNA sequence.Length=559	Score = 219 bits (118), Expect = 2e-053
Contig17303	F1UMNMG01A50BS	Length=563	No Hit		gb|AC240671.1| Lutzomyia longipalpis BAC CUGI_LL_CBa-97I08 complete sequenceLength=73113	Score = 307 bits (166), Expect = 5e-080	emb|AM097061.1| AM097061 Lutzomyia longipalpis Jacobina whole fly Lutzomyia longipalpis cDNA clone NSFM-05h02, mRNA sequence.Length=1142	Score = 318 bits (172), Expect = 2e-083
Contig16804	F1UMNMG01B3GQ0	Length=528	No Hit		No Hit		emb|AM097311.1| AM097311 Lutzomyia longipalpis Jacobina whole fly Lutzomyia longipalpis cDNA clone NSFM-28b05, mRNA sequence.Length=1231	Score = 586 bits (317), Expect = 4e-164
Contig16244	F1UMNMG01AZXP5	Length=637	No Hit		No Hit		No Hit
Contig16168	F1UMNMG01A7GLK	Length=474	tr|B5DKT1|B5DKT1_DROPS GA22778 (Znf_RING; zinc ion binding; E3 ubiquitin-protein ligase activity is intrinsic to the RING domain of c-Cbl and is likely to be a general function of this domain; Various RING fingers exhibit binding activity towards E2 ubiquitin-conjugating enzymes) OS=Drosophila pseudoobscura pseudoobscura GN=GA22778 PE=4 SV=1Length=1611	Score = 94.4 bits (233), Expect = 8e-018	gb|AC240671.1| Lutzomyia longipalpis BAC CUGI_LL_CBa-97I08 complete sequenceLength=73113	Score = 219 bits (118), Expect = 2e-053	emb|AM098160.1| AM098160 Lutzomyia longipalpis Jacobina whole fly Lutzomyia longipalpis cDNA clone NSFM-11f05, mRNA sequence.Length=1097	Score = 224 bits (121), Expect = 4e-055
Contig15380	F1UMNMG01BA73D	Length=298	No Hit		gb|FJ040565.1| Lutzomyia longipalpis 28S ribosomal RNA gene, partial sequenceLength=2893	Score = 363 bits (196), Expect = 6e-097	gb|EW993522.1| LJGDIM27_B06 Adult female Lutzomyia longipalpis midgut library post blood meal digestion containing Leishmania chagasi Lutzomyia longipalpis cDNA, mRNA sequence.Length=380	Score = 449 bits (243), Expect = 3e-123
Contig1520	F1UMNMG01A7BAZ	Length=477	tr|B0W5T7|B0W5T7_CULQU E3 ubiquitin-protein ligase HECTD1 (ubiquitin-protein ligase activity; metal ion binding) OS=Culex quinquefasciatus GN=CpipJ_CPIJ002462 PE=4 SV=1Length=2813	Score = 158 bits (400), Expect = 3e-037	No Hit		No Hit
Contig15123	F1UMNMG01CC8PO	Length=549	No Hit		gb|AC240671.1| Lutzomyia longipalpis BAC CUGI_LL_CBa-97I08 complete sequenceLength=73113	Score = 246 bits (133), Expect = 1e-061	emb|AM101399.1| AM101399 Lutzomyia longipalpis Jacobina whole fly Lutzomyia longipalpis cDNA clone NSFM-125c11, mRNA sequence.Length=1413	Score = 263 bits (142), Expect = 9e-067
Contig14835	F1UMNMG01CFDKE	Length=495	No Hit		No Hit		No Hit
Contig14511	F1UMNMG01CKH7P	Length=455	No Hit		gb|AC240671.1| Lutzomyia longipalpis BAC CUGI_LL_CBa-97I08 complete sequenceLength=73113	Score = 289 bits (156), Expect = 2e-074	emb|AM101241.1| AM101241 Lutzomyia longipalpis Jacobina whole fly Lutzomyia longipalpis cDNA clone NSFM-30d10, mRNA sequence.Length=1325	Score = 315 bits (170), Expect = 2e-082
Contig13948	F1UMNMG01BF0S0	Length=445	No Hit		No Hit		No Hit
Contig13812	F1UMNMG01CJS7W	Length=553	tr|B4N317|B4N317_DROWI GK12606 (Ig_I-set; Ig-like domains are involved in a variety of functions, including cell-cell recognition, cell-surface receptors, muscle structure and the immune system) OS=Drosophila willistoni GN=GK12606 PE=4 SV=1Length=2718	Score = 90.1 bits (222), Expect(2) = 5e-026	No Hit		No Hit
Contig13649	F1UMNMG01AM6EK	Length=482	tr|B0WP74|B0WP74_CULQU Putative uncharacterized protein (Myosin-rhogap protein; intracellular signal transduction) OS=Culex quinquefasciatus GN=CpipJ_CPIJ008896 PE=4 SV=1Length=1030	Score = 251 bits (642), Expect = 3e-065	No Hit		No Hit
Contig13641	F1UMNMG01B40VJ	Length=454	No Hit		No Hit		No Hit
Contig13552	F1UMNMG01B8CXN	Length=588	tr|E3X463|E3X463_ANODA Putative uncharacterized protein (Putative fatty acid synthase S-acetyltransferase; biosynthetic process) OS=Anopheles darlingi GN=AND_13167 PE=4 SV=1Length=1517	Score = 89.4 bits (220), Expect = 4e-016	No Hit		No Hit
Contig13418	F1UMNMG01B8PHS	Length=285	No Hit		No Hit		No Hit
Contig1333	F1UMNMG01AR7UI	Length=529	No Hit		No Hit		No Hit
Contig13207	F1UMNMG01CJD5U	Length=394	No Hit		gb|AC240671.1| Lutzomyia longipalpis BAC CUGI_LL_CBa-97I08 complete sequenceLength=73113	Score = 230 bits (124), Expect = 8e-057	emb|AM097061.1| AM097061 Lutzomyia longipalpis Jacobina whole fly Lutzomyia longipalpis cDNA clone NSFM-05h02, mRNA sequence.Length=1142	Score = 246 bits (133), Expect = 6e-062
Contig13151	F1UMNMG01BCITK	Length=407	No Hit		gb|AC240671.1| Lutzomyia longipalpis BAC CUGI_LL_CBa-97I08 complete sequenceLength=73113	Score = 252 bits (136), Expect = 2e-063	emb|AM101241.1| AM101241 Lutzomyia longipalpis Jacobina whole fly Lutzomyia longipalpis cDNA clone NSFM-30d10, mRNA sequence.Length=1325	Score = 289 bits (156), Expect = 1e-074
Contig13044	F1UMNMG01A2LVB	Length=483	tr|B0WLA2|B0WLA2_CULQU Exocyst complex component 3 (Sec6 is a component of the multiprotein exocyst complex. Exocyst proteins localise to regions of active exocytosis in an F-actin-dependent and exocytosis- independent manner) OS=Culex quinquefasciatus GN=CpipJ_CPIJ007822 PE=4 SV=1Length=717	Score = 173 bits (439), Expect(2) = 1e-057	No Hit		No Hit
Contig12975	F1UMNMG01BJS2J	Length=568	No Hit		gb|AC240671.1| Lutzomyia longipalpis BAC CUGI_LL_CBa-97I08 complete sequenceLength=73113	Score = 235 bits (127), Expect = 3e-058	emb|AM098160.1| AM098160 Lutzomyia longipalpis Jacobina whole fly Lutzomyia longipalpis cDNA clone NSFM-11f05, mRNA sequence.Length=1097	Score = 255 bits (138), Expect = 2e-064
Contig12664	F1UMNMG01CFUGV	Length=535	No Hit		gb|AC240671.1| Lutzomyia longipalpis BAC CUGI_LL_CBa-97I08 complete sequenceLength=73113	Score = 244 bits (132), Expect = 4e-061	gb|EW989821.1| LJGFIL9_D02 Adult female Lutzomyia longipalpis midgut library blood fed containing Leishmania chagasi Lutzomyia longipalpis cDNA, mRNA sequence.Length=774	Score = 294 bits (159), Expect = 3e-076
Contig12582	F1UMNMG01CD0Z4	Length=532	No Hit		No Hit		No Hit
Contig12467	F1UMNMG01A2XMT	Length=556	No Hit		gb|AC240671.1| Lutzomyia longipalpis BAC CUGI_LL_CBa-97I08 complete sequenceLength=73113	Score = 340 bits (184), Expect = 5e-090	emb|AM097061.1| AM097061 Lutzomyia longipalpis Jacobina whole fly Lutzomyia longipalpis cDNA clone NSFM-05h02, mRNA sequence.Length=1142	Score = 340 bits (184), Expect = 4e-090
Contig12445	F1UMNMG01BNCPT	Length=436	No Hit		No Hit		No Hit
Contig12234	F1UMNMG01CNK5B	Length=554	No Hit		No Hit		gb|EW995639.1| LJGU-M-5_E01 Adult female Lutzomyia longipalpis midgut library sugar fed Lutzomyia longipalpis cDNA, mRNA sequence.Length=559	Score = 220 bits (119), Expect = 5e-054
Contig1207	F1UMNMG01CHL1X	Length=469	tr|B4H5Z4|B4H5Z4_DROPE GL24674 (nucleic acid binding, zinc ion binding) OS=Drosophila persimilis GN=GL24674 PE=4 SV=1Length=987	Score = 75.9 bits (185), Expect(2) = 8e-028	No Hit		No Hit
Contig12069	F1UMNMG01CMI34	Length=502	tr|Q16TW3|Q16TW3_AEDAE Putative uncharacterized protein (Maternal protein exuperantia; Ensures the proper localization of the mRNA of the bicoid gene to the anterior regions of the oocyte thus playing a fundamental role in the establishment of the polarity of the oocyte. May bind the bcd mRNA; multicellular organismal development) OS=Aedes aegypti GN=AAEL010097 PE=4 SV=1Length=599	Score = 50.1 bits (118), Expect(3) = 6e-015	No Hit		emb|AM106045.1| AM106045 Lutzomyia longipalpis Jacobina whole fly Lutzomyia longipalpis cDNA clone NSFM-108c01, mRNA sequence.Length=906	Score = 713 bits (386), Expect = 0.0
Contig11812	F1UMNMG01BDVU9	Length=609	No Hit		No Hit		No Hit
Contig11457	F1UMNMG01B4SOQ	Length=486	No Hit		gb|AC240671.1| Lutzomyia longipalpis BAC CUGI_LL_CBa-97I08 complete sequenceLength=73113	Score = 243 bits (131), Expect = 1e-060	emb|AM097061.1| AM097061 Lutzomyia longipalpis Jacobina whole fly Lutzomyia longipalpis cDNA clone NSFM-05h02, mRNA sequence.Length=1142	Score = 259 bits (140), Expect = 1e-065
Contig11400	F1UMNMG01BWO6C	Length=305	No Hit		No Hit		No Hit
Contig11303	F1UMNMG01CEB5N	Length=379	No Hit		gb|AC240671.1| Lutzomyia longipalpis BAC CUGI_LL_CBa-97I08 complete sequenceLength=73113	Score = 255 bits (138), Expect = 1e-064	gb|EW989821.1| LJGFIL9_D02 Adult female Lutzomyia longipalpis midgut library blood fed containing Leishmania chagasi Lutzomyia longipalpis cDNA, mRNA sequence.Length=774	Score = 294 bits (159), Expect = 2e-076
Contig11254	F1UMNMG01B4FJV	Length=253	No Hit		No Hit		No Hit
Contig11246	F1UMNMG01BAWME	Length=488	No Hit		No Hit		No Hit
Contig1088	F1UMNMG01COYF9	Length=584	No Hit		gb|AC240671.1| Lutzomyia longipalpis BAC CUGI_LL_CBa-97I08 complete sequenceLength=73113	Score = 335 bits (181), Expect = 3e-088	emb|AM097061.1| AM097061 Lutzomyia longipalpis Jacobina whole fly Lutzomyia longipalpis cDNA clone NSFM-05h02, mRNA sequence.Length=1142	Score = 307 bits (166), Expect = 4e-080
Contig10464	F1UMNMG01CKO2G	Length=624	No Hit		No Hit		No Hit
Contig10435	F1UMNMG01BO447	Length=550	No Hit		gb|AC240671.1| Lutzomyia longipalpis BAC CUGI_LL_CBa-97I08 complete sequenceLength=73113	Score = 257 bits (139), Expect = 5e-065	emb|AM101241.1| AM101241 Lutzomyia longipalpis Jacobina whole fly Lutzomyia longipalpis cDNA clone NSFM-30d10, mRNA sequence.Length=1325	Score = 298 bits (161), Expect = 2e-077
Contig10109	F1UMNMG01AOQHZ	Length=460	tr|B4NFV5|B4NFV5_DROWI GK22457 (Contains 1 RING-type zinc finger; zinc ion binding; The function of this domain is not yet known but it could be involved in protein-protein interaction and be important for the assembly or activity of multicomponent complexes involved in transcriptional activation or repression) OS=Drosophila willistoni GN=GK22457 PE=4 SV=1Length=1120	Score = 182 bits (462), Expect(2) = 7e-050	No Hit		No Hit
Contig10107	F1UMNMG01B0UJ1	Length=544	tr|Q17FJ9|Q17FJ9_AEDAE Putative uncharacterized protein (putative salivary mucin; chitin metabolic process; chitin binding) OS=Aedes aegypti GN=AAEL003368 PE=4 SV=1Length=541	Score = 76.6 bits (187), Expect(2) = 4e-013	No Hit		No Hit
Contig10041	F1UMNMG01BXB31	Length=405	No Hit		No Hit		gb|EW996092.1| LJGUM-P02_A12 Adult female Lutzomyia longipalpis midgut library sugar fed Lutzomyia longipalpis cDNA, mRNA sequence.Length=258	Score = 390 bits (211), Expect = 3e-105
	F1UMNMG01BCRVO	Length=477	Q9XHE3 putative gamma-thionin precursor [Capsicum chinense] (defense response)	Score = 130 bits (326), Expect = 7e-36
	F1UMNMG01AZRFW	Length=551	Tonoplast intrinsic protein [Brassica napus]; Belongs to the MIP/aquaporin family, transporter activity	Score = 143 bits (361), Expect(3) = 6e-45
	F1UMNMG01BRP0O	Length=522	putative catalase [Lutzomyia longipalpis] ( hydrogen peroxide catabolic process)	Score = 354 bits (909), Expect = 4e-118
	F1UMNMG01APIYL	Length=352	cytochrome oxidase subunit 1 [Sarcophaga dux]	Score = 57.4 bits (137), Expect(3) = 2e-18
	F1UMNMG01BTO68	Length=353	cytochrome oxidase subunit I [Sarcophaga dux]	Score = 46.6 bits (109), Expect(2) = 4e-07

## Sheet: Blastx hits with GO annotation
					Biological process	Molecular function	Cellular component
Contig30589	F1UMNMG01BAU83	Length=708	No Hit					emb|FP601882.1| FP601882 Hirudo medicinalis normalized library Hirudo medicinalis cDNA, mRNA sequence.Length=567	Score = 401 bits (217), Expect = 2e-108
Contig30589	F1UMNMG01CB4GO	Length=443	tr|B4N5L0|B4N5L0_DROWI GK12697 (monooxygenase activity) OS=Drosophila willistoni GN=GK12697 PE=4 SV=1Length=182	Score = 73.2 bits (178), Expect = 2e-011				No Hit
Contig30589	F1UMNMG01BJ6VU	Length=467	tr|G7K0E5|G7K0E5_MEDTR Putative uncharacterized protein OS=Medicago truncatula GN=MTR_5g051150 PE=4 SV=1Length=2133	Score = 58.5 bits (140), Expect = 5e-007				emb|FP601882.1| FP601882 Hirudo medicinalis normalized library Hirudo medicinalis cDNA, mRNA sequence.Length=567	Score = 383 bits (207), Expect = 5e-103
Contig30589	F1UMNMG01A0AZV	Length=341	No Hit					emb|FP601882.1| FP601882 Hirudo medicinalis normalized library Hirudo medicinalis cDNA, mRNA sequence.Length=567	Score = 368 bits (199), Expect = 1e-098
Contig30589	F1UMNMG01CMZF9	Length=555	tr|B4N5L0|B4N5L0_DROWI GK12697 (monooxygenase activity) OS=Drosophila willistoni GN=GK12697 PE=4 SV=1Length=182	Score = 73.2 bits (178), Expect = 2e-011				No Hit
Contig30589	F1UMNMG01A4VY2	Length=343	tr|B4N5L0|B4N5L0_DROWI GK12697 (monooxygenase activity) OS=Drosophila willistoni GN=GK12697 PE=4 SV=1Length=182	Score = 75.5 bits (184), Expect = 4e-012				emb|FP601882.1| FP601882 Hirudo medicinalis normalized library Hirudo medicinalis cDNA, mRNA sequence.Length=567	Score = 355 bits (192), Expect = 9e-095
Contig30589	F1UMNMG01CGXN9	Length=426	tr|B4N5L0|B4N5L0_DROWI GK12697 (monooxygenase activity) OS=Drosophila willistoni GN=GK12697 PE=4 SV=1Length=182	Score = 74.3 bits (181), Expect = 8e-012				No Hit
Contig30589	F1UMNMG01B70ON	Length=523	tr|E9HZ40|E9HZ40_DAPPU Putative uncharacterized protein OS=Daphnia pulex GN=DAPPUDRAFT_119636 PE=4 SV=1Length=130	Score = 77.8 bits (190), Expect = 8e-013				emb|FP601882.1| FP601882 Hirudo medicinalis normalized library Hirudo medicinalis cDNA, mRNA sequence.Length=567	Score = 436 bits (236), Expect = 5e-119
Contig30589	F1UMNMG01BEBR3	Length=394	tr|B4N5L0|B4N5L0_DROWI GK12697 (monooxygenase activity) OS=Drosophila willistoni GN=GK12697 PE=4 SV=1Length=182	Score = 79.7 bits (195), Expect = 2e-013				emb|FP601882.1| FP601882 Hirudo medicinalis normalized library Hirudo medicinalis cDNA, mRNA sequence.Length=567	Score = 296 bits (160), Expect = 6e-077
Contig30589	F1UMNMG01B9IHU	Length=348	tr|B4N5L0|B4N5L0_DROWI GK12697 (monooxygenase activity) OS=Drosophila willistoni GN=GK12697 PE=4 SV=1Length=182	Score = 73.2 bits (178), Expect = 2e-011				emb|FP601882.1| FP601882 Hirudo medicinalis normalized library Hirudo medicinalis cDNA, mRNA sequence.Length=567	Score = 344 bits (186), Expect = 2e-091
Contig30589	F1UMNMG01CL9OS	Length=364	tr|B4N5L0|B4N5L0_DROWI GK12697 (monooxygenase activity) OS=Drosophila willistoni GN=GK12697 PE=4 SV=1Length=182	Score = 74.3 bits (181), Expect = 9e-012				emb|FP601882.1| FP601882 Hirudo medicinalis normalized library Hirudo medicinalis cDNA, mRNA sequence.Length=567	Score = 281 bits (152), Expect = 2e-072
Contig30589	F1UMNMG01BL0H5	Length=351	No Hit					emb|FP601882.1| FP601882 Hirudo medicinalis normalized library Hirudo medicinalis cDNA, mRNA sequence.Length=567	Score = 327 bits (177), Expect = 2e-086
Contig30589	F1UMNMG01BQ6KF	Length=365	tr|B4N5L0|B4N5L0_DROWI GK12697 (monooxygenase activity) OS=Drosophila willistoni GN=GK12697 PE=4 SV=1Length=182	Score = 76.6 bits (187), Expect = 2e-012				emb|FP601882.1| FP601882 Hirudo medicinalis normalized library Hirudo medicinalis cDNA, mRNA sequence.Length=567	Score = 420 bits (227), Expect = 3e-114
Contig30589	F1UMNMG01AOWJK	Length=538	tr|A9U509|A9U509_PHYPA Predicted protein (Fragment) OS=Physcomitrella patens subsp. patens GN=PHYPADRAFT_156553 PE=4 SV=1Length=107	Score = 61.6 bits (148), Expect = 7e-008				emb|FP601882.1| FP601882 Hirudo medicinalis normalized library Hirudo medicinalis cDNA, mRNA sequence.Length=567	Score = 322 bits (174), Expect = 1e-084
Contig30589	F1UMNMG01A8R5N	Length=328	tr|B4N5L0|B4N5L0_DROWI GK12697 (monooxygenase activity) OS=Drosophila willistoni GN=GK12697 PE=4 SV=1Length=182	Score = 74.3 bits (181), Expect = 8e-012				emb|FP601882.1| FP601882 Hirudo medicinalis normalized library Hirudo medicinalis cDNA, mRNA sequence.Length=567	Score = 361 bits (195), Expect = 2e-096
Contig30589	F1UMNMG01BQIEM	Length=531	tr|B4N5L0|B4N5L0_DROWI GK12697 (monooxygenase activity) OS=Drosophila willistoni GN=GK12697 PE=4 SV=1Length=182	Score = 74.3 bits (181), Expect = 9e-012				No Hit
Contig30589	F1UMNMG01BFB3U	Length=414	tr|B4N5L0|B4N5L0_DROWI GK12697 (monooxygenase activity) OS=Drosophila willistoni GN=GK12697 PE=4 SV=1Length=182	Score = 73.2 bits (178), Expect = 2e-011				emb|FP601882.1| FP601882 Hirudo medicinalis normalized library Hirudo medicinalis cDNA, mRNA sequence.Length=567	Score = 407 bits (220), Expect = 3e-110
Contig30589	F1UMNMG01BKH8K	Length=330	tr|B4N5L0|B4N5L0_DROWI GK12697 (monooxygenase activity) OS=Drosophila willistoni GN=GK12697 PE=4 SV=1Length=182	Score = 75.1 bits (183), Expect = 5e-012				emb|FP601882.1| FP601882 Hirudo medicinalis normalized library Hirudo medicinalis cDNA, mRNA sequence.Length=567	Score = 268 bits (145), Expect = 1e-068
Contig30589	F1UMNMG01BQARH	Length=258	tr|B4N5L0|B4N5L0_DROWI GK12697 (monooxygenase activity) OS=Drosophila willistoni GN=GK12697 PE=4 SV=1Length=182	Score = 72.4 bits (176), Expect = 3e-011				No Hit
Contig30589	F1UMNMG01BVDSO	Length=237	tr|B4N5L0|B4N5L0_DROWI GK12697 (monooxygenase activity) OS=Drosophila willistoni GN=GK12697 PE=4 SV=1Length=182	Score = 73.2 bits (178), Expect = 2e-011				No Hit
Contig30589	F1UMNMG01AUP0Z	Length=343	tr|B4N5L0|B4N5L0_DROWI GK12697 (monooxygenase activity) OS=Drosophila willistoni GN=GK12697 PE=4 SV=1Length=182	Score = 67.0 bits (162), Expect = 1e-009				emb|FP601882.1| FP601882 Hirudo medicinalis normalized library Hirudo medicinalis cDNA, mRNA sequence.Length=567	Score = 322 bits (174), Expect = 9e-085
Contig30589	F1UMNMG01A5T6Q	Length=350	tr|B4N5L0|B4N5L0_DROWI GK12697 (monooxygenase activity) OS=Drosophila willistoni GN=GK12697 PE=4 SV=1Length=182	Score = 74.3 bits (181), Expect = 9e-012				emb|FP601882.1| FP601882 Hirudo medicinalis normalized library Hirudo medicinalis cDNA, mRNA sequence.Length=567	Score = 322 bits (174), Expect = 9e-085
Contig30589	F1UMNMG01BTGKI	Length=198	No Hit					emb|FP601882.1| FP601882 Hirudo medicinalis normalized library Hirudo medicinalis cDNA, mRNA sequence.Length=567	Score = 279 bits (151), Expect = 3e-072
Contig15118	F1UMNMG01B2KE4	Length=568	No Hit					emb|AM093891.1| AM093891 Lutzomyia longipalpis Jacobina whole fly Lutzomyia longipalpis cDNA clone NSFM-40b02, mRNA sequence.Length=1353	Score = 706 bits (382), Expect = 0.0
Contig15118	F1UMNMG01BRCH3	Length=483	No Hit					emb|AM093889.1| AM093889 Lutzomyia longipalpis Jacobina whole fly Lutzomyia longipalpis cDNA clone NSFM-40b02, mRNA sequence.Length=1371	Score = 667 bits (361), Expect = 0.0
Contig15118	F1UMNMG01BKEQC	Length=561	No Hit					emb|AM093891.1| AM093891 Lutzomyia longipalpis Jacobina whole fly Lutzomyia longipalpis cDNA clone NSFM-40b02, mRNA sequence.Length=1353	Score = 791 bits (428), Expect = 0.0
Contig15118	F1UMNMG01CERQB	Length=547	No Hit					emb|AM093891.1| AM093891 Lutzomyia longipalpis Jacobina whole fly Lutzomyia longipalpis cDNA clone NSFM-40b02, mRNA sequence.Length=1353	Score = 562 bits (304), Expect = 8e-157
Contig15118	F1UMNMG01BEHBE	Length=555	No Hit					emb|AM093891.1| AM093891 Lutzomyia longipalpis Jacobina whole fly Lutzomyia longipalpis cDNA clone NSFM-40b02, mRNA sequence.Length=1353	Score = 841 bits (455), Expect = 0.0
Contig15118	F1UMNMG01CD31G	Length=488	tr|E9HM72|E9HM72_DAPPU CTR1, high-affinity copper uptake protein 1, copper transporter 1, solute carrier family 31 member 1 OS=Daphnia pulex GN=CTR1 PE=4 SV=1Length=171	Score = 85.5 bits (210), Expect = 4e-015		copper ion transmembrane transporter activity	integral to membrane	emb|AM093890.1| AM093890 Lutzomyia longipalpis Jacobina whole fly Lutzomyia longipalpis cDNA clone NSFM-89a05, mRNA sequence.Length=1250	Score = 767 bits (415), Expect = 0.0
Contig15118	F1UMNMG01CN0DT	Length=491	tr|E3WUT6|E3WUT6_ANODA Putative uncharacterized protein (copper ion transmembrane transporter activity) OS=Anopheles darlingi GN=AND_07278 PE=4 SV=1Length=153	Score = 101 bits (251), Expect = 7e-020		copper ion transmembrane transporter activity	integral to membrane	emb|AM093890.1| AM093890 Lutzomyia longipalpis Jacobina whole fly Lutzomyia longipalpis cDNA clone NSFM-89a05, mRNA sequence.Length=1250	Score = 798 bits (432), Expect = 0.0
Contig15118	F1UMNMG01B1N0G	Length=849	No Hit					emb|AM093891.1| AM093891 Lutzomyia longipalpis Jacobina whole fly Lutzomyia longipalpis cDNA clone NSFM-40b02, mRNA sequence.Length=1353	Score = 503 bits (272), Expect = 8e-139
Contig15118	F1UMNMG01B7C93	Length=482	tr|E3WUT6|E3WUT6_ANODA Putative uncharacterized protein (copper ion transmembrane transporter activity) OS=Anopheles darlingi GN=AND_07278 PE=4 SV=1Length=153	Score = 102 bits (255), Expect = 2e-020		copper ion transmembrane transporter activity	integral to membrane	emb|AM093889.1| AM093889 Lutzomyia longipalpis Jacobina whole fly Lutzomyia longipalpis cDNA clone NSFM-40b02, mRNA sequence.Length=1371	Score = 802 bits (434), Expect = 0.0
Contig15118	F1UMNMG01BJZLN	Length=488	tr|E3WUT6|E3WUT6_ANODA Putative uncharacterized protein (copper ion transmembrane transporter activity) OS=Anopheles darlingi GN=AND_07278 PE=4 SV=1Length=153	Score = 101 bits (251), Expect = 7e-020		copper ion transmembrane transporter activity	integral to membrane	emb|AM093890.1| AM093890 Lutzomyia longipalpis Jacobina whole fly Lutzomyia longipalpis cDNA clone NSFM-89a05, mRNA sequence.Length=1250	Score = 869 bits (470), Expect = 0.0
Contig15118	F1UMNMG01ASHPP	Length=444	No Hit					emb|AM093891.1| AM093891 Lutzomyia longipalpis Jacobina whole fly Lutzomyia longipalpis cDNA clone NSFM-40b02, mRNA sequence.Length=1353	Score = 405 bits (219), Expect = 1e-109
Contig15118	F1UMNMG01BOQN7	Length=479	No Hit					emb|AM093891.1| AM093891 Lutzomyia longipalpis Jacobina whole fly Lutzomyia longipalpis cDNA clone NSFM-40b02, mRNA sequence.Length=1353	Score = 638 bits (345), Expect = 1e-179
Contig15118	F1UMNMG01BV6GA	Length=460	tr|E3WUT6|E3WUT6_ANODA Putative uncharacterized protein (copper ion transmembrane transporter activity) OS=Anopheles darlingi GN=AND_07278 PE=4 SV=1Length=153	Score = 99.4 bits (246), Expect = 2e-019		copper ion transmembrane transporter activity	integral to membrane	emb|AM093890.1| AM093890 Lutzomyia longipalpis Jacobina whole fly Lutzomyia longipalpis cDNA clone NSFM-89a05, mRNA sequence.Length=1250	Score = 702 bits (380), Expect = 0.0
Contig21297	F1UMNMG01CCJPA	Length=343	tr|E2ANF3|E2ANF3_CAMFO Putative uncharacterized protein OS=Camponotus floridanus GN=EAG_01178 PE=4 SV=1Length=298	Score = 58.9 bits (141), Expect = 4e-007				emb|FP601882.1| FP601882 Hirudo medicinalis normalized library Hirudo medicinalis cDNA, mRNA sequence.Length=567	Score = 298 bits (161), Expect = 1e-077
Contig21297	F1UMNMG01A0HGF	Length=342	tr|E2ANF3|E2ANF3_CAMFO Putative uncharacterized protein OS=Camponotus floridanus GN=EAG_01178 PE=4 SV=1Length=298	Score = 58.9 bits (141), Expect = 4e-007				emb|FP601882.1| FP601882 Hirudo medicinalis normalized library Hirudo medicinalis cDNA, mRNA sequence.Length=567	Score = 298 bits (161), Expect = 1e-077
Contig21297	F1UMNMG01BFZX6	Length=538	tr|G7K0E9|G7K0E9_MEDTR Cytochrome P450 likeTBP OS=Medicago truncatula GN=MTR_5g051190 PE=4 SV=1Length=656	Score = 82.4 bits (202), Expect = 3e-014				emb|FP595913.1| FP595913 Hirudo medicinalis normalized library Hirudo medicinalis cDNA, mRNA sequence.Length=540	Score = 327 bits (177), Expect = 3e-086
Contig21297	F1UMNMG01A12EC	Length=342	tr|E2ANF3|E2ANF3_CAMFO Putative uncharacterized protein OS=Camponotus floridanus GN=EAG_01178 PE=4 SV=1Length=298	Score = 58.9 bits (141), Expect = 4e-007				emb|FP601882.1| FP601882 Hirudo medicinalis normalized library Hirudo medicinalis cDNA, mRNA sequence.Length=567	Score = 298 bits (161), Expect = 1e-077
Contig21297	F1UMNMG01CEM6Q	Length=342	No Hit					emb|FP601882.1| FP601882 Hirudo medicinalis normalized library Hirudo medicinalis cDNA, mRNA sequence.Length=567	Score = 287 bits (155), Expect = 3e-074
Contig21297	F1UMNMG01AVNN9	Length=342	tr|E2ANF3|E2ANF3_CAMFO Putative uncharacterized protein OS=Camponotus floridanus GN=EAG_01178 PE=4 SV=1Length=298	Score = 58.9 bits (141), Expect = 4e-007				emb|FP601882.1| FP601882 Hirudo medicinalis normalized library Hirudo medicinalis cDNA, mRNA sequence.Length=567	Score = 298 bits (161), Expect = 1e-077
Contig21297	F1UMNMG01BQ3HD	Length=335	No Hit					emb|FP601882.1| FP601882 Hirudo medicinalis normalized library Hirudo medicinalis cDNA, mRNA sequence.Length=567	Score = 287 bits (155), Expect = 3e-074
Contig21297	F1UMNMG01B5RZ8	Length=346	No Hit					emb|FP601882.1| FP601882 Hirudo medicinalis normalized library Hirudo medicinalis cDNA, mRNA sequence.Length=567	Score = 287 bits (155), Expect = 3e-074
Contig21297	F1UMNMG01BS342	Length=337	No Hit					emb|FP601882.1| FP601882 Hirudo medicinalis normalized library Hirudo medicinalis cDNA, mRNA sequence.Length=567	Score = 287 bits (155), Expect = 3e-074
Contig21297	F1UMNMG01A6JXF	Length=338	No Hit					emb|FP601882.1| FP601882 Hirudo medicinalis normalized library Hirudo medicinalis cDNA, mRNA sequence.Length=567	Score = 287 bits (155), Expect = 3e-074
Contig21934	F1UMNMG01B11UX	Length=567	No Hit					emb|AM098160.1| AM098160 Lutzomyia longipalpis Jacobina whole fly Lutzomyia longipalpis cDNA clone NSFM-11f05, mRNA sequence.Length=1097	Score = 305 bits (165), Expect = 2e-079
Contig21934	F1UMNMG01BV3XZ	Length=596	No Hit					emb|AM097061.1| AM097061 Lutzomyia longipalpis Jacobina whole fly Lutzomyia longipalpis cDNA clone NSFM-05h02, mRNA sequence.Length=1142	Score = 291 bits (157), Expect = 4e-075
Contig21934	F1UMNMG01A7O03	Length=568	No Hit					emb|AM097061.1| AM097061 Lutzomyia longipalpis Jacobina whole fly Lutzomyia longipalpis cDNA clone NSFM-05h02, mRNA sequence.Length=1142	Score = 302 bits (163), Expect = 2e-078
Contig21934	F1UMNMG01BN0JR	Length=566	No Hit					emb|AM097061.1| AM097061 Lutzomyia longipalpis Jacobina whole fly Lutzomyia longipalpis cDNA clone NSFM-05h02, mRNA sequence.Length=1142	Score = 316 bits (171), Expect = 7e-083
Contig21934	F1UMNMG01CJ5LG	Length=567	No Hit					emb|AM098160.1| AM098160 Lutzomyia longipalpis Jacobina whole fly Lutzomyia longipalpis cDNA clone NSFM-11f05, mRNA sequence.Length=1097	Score = 303 bits (164), Expect = 5e-079
Contig21934	F1UMNMG01BJG54	Length=575	No Hit					emb|AM098160.1| AM098160 Lutzomyia longipalpis Jacobina whole fly Lutzomyia longipalpis cDNA clone NSFM-11f05, mRNA sequence.Length=1097	Score = 302 bits (163), Expect = 2e-078
Contig21934	F1UMNMG01B3RUQ	Length=645	No Hit					emb|AM098160.1| AM098160 Lutzomyia longipalpis Jacobina whole fly Lutzomyia longipalpis cDNA clone NSFM-11f05, mRNA sequence.Length=1097	Score = 244 bits (132), Expect = 4e-061
Contig4366	F1UMNMG01CBEDR	Length=193	No Hit					No Hit
Contig4366	F1UMNMG01ANE6W	Length=192	No Hit					No Hit
Contig4366	F1UMNMG01B0XT5	Length=192	No Hit					No Hit
Contig4366	F1UMNMG01BRO2R	Length=193	No Hit					No Hit
Contig4366	F1UMNMG01A963V	Length=194	No Hit					No Hit
Contig17575	F1UMNMG01APIG7	Length=479	tr|D3TLF2|D3TLF2_GLOMM Adenosine monophosphate deaminase OS=Glossina morsitans morsitans PE=2 SV=1Length=774	Score = 232 bits (592), Expect(2) = 5e-067	IMP biosynthetic process	AMP deaminase activity		emb|AM106748.1| AM106748 Lutzomyia longipalpis Jacobina whole fly Lutzomyia longipalpis cDNA clone NSFM-62f06, mRNA sequence.Length=1303	Score = 706 bits (382), Expect = 0.0
Contig17575	F1UMNMG01BJ9O8	Length=485	tr|D3TLF2|D3TLF2_GLOMM Adenosine monophosphate deaminase OS=Glossina morsitans morsitans PE=2 SV=1Length=774	Score = 214 bits (545), Expect(2) = 1e-063	IMP biosynthetic process	AMP deaminase activity		emb|AM106748.1| AM106748 Lutzomyia longipalpis Jacobina whole fly Lutzomyia longipalpis cDNA clone NSFM-62f06, mRNA sequence.Length=1303	Score = 710 bits (384), Expect = 0.0
Contig17575	F1UMNMG01A44AL	Length=482	tr|D3TLF2|D3TLF2_GLOMM Adenosine monophosphate deaminase OS=Glossina morsitans morsitans PE=2 SV=1Length=774	Score = 272 bits (695), Expect = 2e-071	IMP biosynthetic process	AMP deaminase activity		emb|AM106748.1| AM106748 Lutzomyia longipalpis Jacobina whole fly Lutzomyia longipalpis cDNA clone NSFM-62f06, mRNA sequence.Length=1303	Score = 715 bits (387), Expect = 0.0
Contig17575	F1UMNMG01AU3QN	Length=483	tr|D3TLF2|D3TLF2_GLOMM Adenosine monophosphate deaminase OS=Glossina morsitans morsitans PE=2 SV=1Length=774	Score = 214 bits (545), Expect(2) = 2e-064	IMP biosynthetic process	AMP deaminase activity		emb|AM106748.1| AM106748 Lutzomyia longipalpis Jacobina whole fly Lutzomyia longipalpis cDNA clone NSFM-62f06, mRNA sequence.Length=1303	Score = 706 bits (382), Expect = 0.0
Contig10948	F1UMNMG01CGCY8	Length=520	tr|Q17IP0|Q17IP0_AEDAE Ctl2 (Fragment) Belongs to the CTL (choline transporter-like) family; family of proteins probably involved in transport through the plasma membrane OS=Aedes aegypti GN=AAEL002280 PE=4 SV=1Length=700	Score = 99.8 bits (247), Expect(2) = 1e-022			integral to membrane	emb|AM096313.1| AM096313 Lutzomyia longipalpis Jacobina whole fly Lutzomyia longipalpis cDNA clone NSFM-82d04, mRNA sequence.Length=1191	Score = 525 bits (284), Expect = 1e-145
Contig10948	F1UMNMG01AY53N	Length=503	tr|Q17IP0|Q17IP0_AEDAE Ctl2 (Fragment) Belongs to the CTL (choline transporter-like) family; family of proteins probably involved in transport through the plasma membrane OS=Aedes aegypti GN=AAEL002280 PE=4 SV=1Length=700	Score = 139 bits (349), Expect = 3e-031			integral to membrane	emb|AM096313.1| AM096313 Lutzomyia longipalpis Jacobina whole fly Lutzomyia longipalpis cDNA clone NSFM-82d04, mRNA sequence.Length=1191	Score = 628 bits (340), Expect = 7e-177
Contig10948	F1UMNMG01AZT7N	Length=495	tr|Q17IP0|Q17IP0_AEDAE Ctl2 (Fragment) Belongs to the CTL (choline transporter-like) family; family of proteins probably involved in transport through the plasma membrane OS=Aedes aegypti GN=AAEL002280 PE=4 SV=1Length=700	Score = 157 bits (396), Expect = 1e-036			integral to membrane	emb|AM096313.1| AM096313 Lutzomyia longipalpis Jacobina whole fly Lutzomyia longipalpis cDNA clone NSFM-82d04, mRNA sequence.Length=1191	Score = 582 bits (315), Expect = 5e-163
Contig10948	F1UMNMG01ARK4S	Length=465	tr|Q17IP0|Q17IP0_AEDAE Ctl2 (Fragment) Belongs to the CTL (choline transporter-like) family; family of proteins probably involved in transport through the plasma membrane OS=Aedes aegypti GN=AAEL002280 PE=4 SV=1Length=700	Score = 140 bits (354), Expect = 7e-032			integral to membrane	emb|AM096313.1| AM096313 Lutzomyia longipalpis Jacobina whole fly Lutzomyia longipalpis cDNA clone NSFM-82d04, mRNA sequence.Length=1191	Score = 534 bits (289), Expect = 1e-148
Contig9187	F1UMNMG01CF315	Length=550	No Hit					No Hit
Contig9187	F1UMNMG01BLJ62	Length=550	No Hit					No Hit
Contig9187	F1UMNMG01B84GL	Length=558	No Hit					No Hit
Contig638	F1UMNMG01BX4W6	Length=563	No Hit					emb|AM101240.1| AM101240 Lutzomyia longipalpis Jacobina whole fly Lutzomyia longipalpis cDNA clone NSFM-30d10, mRNA sequence.Length=1091	Score = 303 bits (164), Expect = 5e-079
Contig638	F1UMNMG01BUYRQ	Length=571	No Hit					emb|AM097061.1| AM097061 Lutzomyia longipalpis Jacobina whole fly Lutzomyia longipalpis cDNA clone NSFM-05h02, mRNA sequence.Length=1142	Score = 298 bits (161), Expect = 3e-077
Contig638	F1UMNMG01APVW2	Length=409	No Hit					emb|AM101241.1| AM101241 Lutzomyia longipalpis Jacobina whole fly Lutzomyia longipalpis cDNA clone NSFM-30d10, mRNA sequence.Length=1325	Score = 233 bits (126), Expect = 5e-058
Contig25445	F1UMNMG01CD2IO	Length=498	No Hit					No Hit
Contig25445	F1UMNMG01BQ7R6	Length=476	No Hit					No Hit
Contig25445	F1UMNMG01AYWKJ	Length=478	No Hit					No Hit
Contig9190	F1UMNMG01BAPQX	Length=768	No Hit					No Hit
Contig9190	F1UMNMG01AWLAM	Length=587	No Hit					gb|EW995639.1| LJGU-M-5_E01 Adult female Lutzomyia longipalpis midgut library sugar fed Lutzomyia longipalpis cDNA, mRNA sequence.Length=559	Score = 224 bits (121), Expect = 4e-055
Contig8996	F1UMNMG01AOTIG	Length=542	No Hit					gb|EW987543.1| LJGF-L-5_B05 Adult female Lutzomyia longipalpis midgut library blood fed Lutzomyia longipalpis cDNA, mRNA sequence.Length=683	Score = 276 bits (149), Expect = 1e-070
Contig8996	F1UMNMG01A5DCE	Length=498	tr|B4LT21|B4LT21_DROVI GJ10873 (Seryl-tRNA synthetase; seryl-tRNA aminoacylation) OS=Drosophila virilis GN=GJ10873 PE=3 SV=1Length=501	Score = 132 bits (333), Expect(2) = 3e-049	seryl-tRNA aminoacylation	ATP binding; serine-tRNA ligase activity	cytoplasm	gb|EW993040.1| LJGDIM21_A05 Adult female Lutzomyia longipalpis midgut library post blood meal digestion containing Leishmania chagasi Lutzomyia longipalpis cDNA, mRNA sequence.Length=1086	Score = 791 bits (428), Expect = 0.0
Contig8522	F1UMNMG01AZ3VC	Length=515	No Hit					No Hit
Contig8522	F1UMNMG01A61QQ	Length=501	No Hit					gb|EW995639.1| LJGU-M-5_E01 Adult female Lutzomyia longipalpis midgut library sugar fed Lutzomyia longipalpis cDNA, mRNA sequence.Length=559	Score = 241 bits (130), Expect = 4e-060
Contig8505	F1UMNMG01A8EEE	Length=578	No Hit					emb|AM097061.1| AM097061 Lutzomyia longipalpis Jacobina whole fly Lutzomyia longipalpis cDNA clone NSFM-05h02, mRNA sequence.Length=1142	Score = 305 bits (165), Expect = 2e-079
Contig8505	F1UMNMG01AQTV0	Length=411	No Hit					emb|AM097061.1| AM097061 Lutzomyia longipalpis Jacobina whole fly Lutzomyia longipalpis cDNA clone NSFM-05h02, mRNA sequence.Length=1142	Score = 353 bits (191), Expect = 4e-094
Contig7774	F1UMNMG01ASHNA	Length=564	No Hit					emb|AM098160.1| AM098160 Lutzomyia longipalpis Jacobina whole fly Lutzomyia longipalpis cDNA clone NSFM-11f05, mRNA sequence.Length=1097	Score = 296 bits (160), Expect = 9e-077
Contig7774	F1UMNMG01BMXPH	Length=567	No Hit					emb|AM097061.1| AM097061 Lutzomyia longipalpis Jacobina whole fly Lutzomyia longipalpis cDNA clone NSFM-05h02, mRNA sequence.Length=1142	Score = 296 bits (160), Expect = 9e-077
Contig6260	F1UMNMG01ATCQS	Length=561	tr|E0W1Z3|E0W1Z3_PEDHC Breast cancer type 2 susceptibility protein brca2, putative; double-strand break repair via homologous recombination; regulation of S phase of mitotic cell cycle OS=Pediculus humanus subsp. corporis GN=Phum_PHUM580760 PE=4 SV=1Length=1405	Score = 129 bits (324), Expect = 3e-028	double-strand break repair via homologous recombination; regulation of S phase of mitotic cell cycle	single-stranded DNA binding	nucleus	No Hit
Contig6260	F1UMNMG01CK70B	Length=550	tr|E0W1Z3|E0W1Z3_PEDHC Breast cancer type 2 susceptibility protein brca2, putative; double-strand break repair via homologous recombination; regulation of S phase of mitotic cell cycle OS=Pediculus humanus subsp. corporis GN=Phum_PHUM580760 PE=4 SV=1Length=1405	Score = 118 bits (295), Expect = 6e-025	double-strand break repair via homologous recombination; regulation of S phase of mitotic cell cycle	single-stranded DNA binding	nucleus	No Hit
Contig5929	F1UMNMG01BR22S	Length=346	No Hit					emb|FP601882.1| FP601882 Hirudo medicinalis normalized library Hirudo medicinalis cDNA, mRNA sequence.Length=567	Score = 399 bits (216), Expect = 4e-108
Contig5929	F1UMNMG01ANIIE	Length=670	tr|B4N5L0|B4N5L0_DROWI GK12697 (monooxygenase activity) OS=Drosophila willistoni GN=GK12697 PE=4 SV=1Length=182	Score = 74.3 bits (181), Expect = 2e-011				emb|FP601882.1| FP601882 Hirudo medicinalis normalized library Hirudo medicinalis cDNA, mRNA sequence.Length=567	Score = 300 bits (162), Expect = 8e-078
Contig5826	F1UMNMG01CEZMF	Length=478	tr|B0WNG3|B0WNG3_CULQU Oligosaccharyl transferase (N-linked glycosylation is a ubiquitous protein modification, and is essential for viability in eukaryotic cells) OS=Culex quinquefasciatus GN=CpipJ_CPIJ008679 PE=4 SV=1Length=777	Score = 220 bits (560), Expect = 1e-055	protein glycosylation	oligosaccharyl transferase activity	membrane	No Hit
Contig5826	F1UMNMG01BC99S	Length=483	tr|B0WNG3|B0WNG3_CULQU Oligosaccharyl transferase (N-linked glycosylation is a ubiquitous protein modification, and is essential for viability in eukaryotic cells) OS=Culex quinquefasciatus GN=CpipJ_CPIJ008679 PE=4 SV=1Length=777	Score = 161 bits (407), Expect(2) = 3e-050	protein glycosylation	oligosaccharyl transferase activity	membrane	No Hit
Contig5231	F1UMNMG01CHFR5	Length=516	tr|Q16UB8|Q16UB8_AEDAE Putative uncharacterized protein (Apolipophorins; lipid transporter activity) OS=Aedes aegypti GN=AAEL009955 PE=4 SV=1Length=3321	Score = 181 bits (460), Expect = 4e-044		lipid transporter activity		emb|AM103887.1| AM103887 Lutzomyia longipalpis Jacobina whole fly Lutzomyia longipalpis cDNA clone NSFM-17b10, mRNA sequence.Length=1273	Score = 490 bits (265), Expect = 3e-135
Contig5231	F1UMNMG01B73K8	Length=515	tr|Q16UB8|Q16UB8_AEDAE Putative uncharacterized protein (Apolipophorins; lipid transporter activity) OS=Aedes aegypti GN=AAEL009955 PE=4 SV=1Length=3321	Score = 101 bits (252), Expect(2) = 9e-039		lipid transporter activity		emb|AM103887.1| AM103887 Lutzomyia longipalpis Jacobina whole fly Lutzomyia longipalpis cDNA clone NSFM-17b10, mRNA sequence.Length=1273	Score = 486 bits (263), Expect = 5e-134
Contig4238	F1UMNMG01B1H8C	Length=594	No Hit					gb|EX211692.1| ALYTINFD02F02 Lutzomyia longipalpis Infected Lutzomyia longipalpis cDNA 5', mRNA sequence.Length=571	Score = 346 bits (187), Expect = 9e-092
Contig4238	F1UMNMG01CIGVQ	Length=604	No Hit					emb|AM092123.1| AM092123 Lutzomyia longipalpis Jacobina whole fly Lutzomyia longipalpis cDNA clone NSFM-39d11, mRNA sequence.Length=913	Score = 407 bits (220), Expect = 4e-110
Contig3932	F1UMNMG01A27NQ	Length=794	No Hit					emb|AM098160.1| AM098160 Lutzomyia longipalpis Jacobina whole fly Lutzomyia longipalpis cDNA clone NSFM-11f05, mRNA sequence.Length=1097	Score = 237 bits (128), Expect = 8e-059
Contig3932	F1UMNMG01CIDPT	Length=610	No Hit					emb|AM098160.1| AM098160 Lutzomyia longipalpis Jacobina whole fly Lutzomyia longipalpis cDNA clone NSFM-11f05, mRNA sequence.Length=1097	Score = 220 bits (119), Expect = 6e-054
Contig34756	F1UMNMG01A4RQB	Length=366	No Hit					emb|AM095086.1| AM095086 Lutzomyia longipalpis Jacobina whole fly Lutzomyia longipalpis cDNA clone NSFM-73h10, mRNA sequence.Length=1299	Score = 569 bits (308), Expect = 3e-159
Contig34756	F1UMNMG01BEORN	Length=366	No Hit					emb|AM095086.1| AM095086 Lutzomyia longipalpis Jacobina whole fly Lutzomyia longipalpis cDNA clone NSFM-73h10, mRNA sequence.Length=1299	Score = 569 bits (308), Expect = 3e-159
Contig33170	F1UMNMG01COLNC	Length=508	tr|E2AL58|E2AL58_CAMFO Centrosomal protein of 164 kDa; Rsp5 or WWP domain; protein binding; It is frequently associated with other domains typical for proteins in signal transduction processes OS=Camponotus floridanus GN=EAG_04638 PE=4 SV=1Length=1335	Score = 63.9 bits (154), Expect = 1e-008				No Hit
Contig33170	F1UMNMG01ANLFE	Length=505	tr|B4L5G9|B4L5G9_DROMO GI21515 (WW_Rsp5_WWP; protein binding; It is frequently associated with other domains typical for proteins in signal transduction processes) OS=Drosophila mojavensis GN=GI21515 PE=4 SV=1Length=1483	Score = 58.5 bits (140), Expect = 5e-007				No Hit
Contig32328	F1UMNMG01AW7VE	Length=389	tr|Q9BIJ1|Q9BIJ1_DROVI Actin E2 OS=Drosophila virilis GN=ActE2 PE=3 SV=1Length=376	Score = 171 bits (434), Expect = 4e-041		ATP binding	cytoplasm; cytoskeleton	emb|AM103564.1| AM103564 Lutzomyia longipalpis Jacobina whole fly Lutzomyia longipalpis cDNA clone NSFM-27g09, mRNA sequence.Length=1292	Score = 555 bits (300), Expect = 9e-155
Contig32328	F1UMNMG01BLL1I	Length=453	tr|Q9BIJ1|Q9BIJ1_DROVI Actin E2 OS=Drosophila virilis GN=ActE2 PE=3 SV=1Length=376	Score = 171 bits (434), Expect = 4e-041		ATP binding	cytoplasm; cytoskeleton	emb|AM103563.1| AM103563 Lutzomyia longipalpis Jacobina whole fly Lutzomyia longipalpis cDNA clone SFM-04a10, mRNA sequence.Length=1266	Score = 507 bits (274), Expect = 3e-140
Contig29942	F1UMNMG01CJC22	Length=553	No Hit					gb|EW989821.1| LJGFIL9_D02 Adult female Lutzomyia longipalpis midgut library blood fed containing Leishmania chagasi Lutzomyia longipalpis cDNA, mRNA sequence.Length=774	Score = 296 bits (160), Expect = 9e-077
Contig29942	F1UMNMG01BHESG	Length=554	No Hit					emb|AM101241.1| AM101241 Lutzomyia longipalpis Jacobina whole fly Lutzomyia longipalpis cDNA clone NSFM-30d10, mRNA sequence.Length=1325	Score = 291 bits (157), Expect = 4e-075
Contig28873	F1UMNMG01B8GVC	Length=483	No Hit					emb|AM101240.1| AM101240 Lutzomyia longipalpis Jacobina whole fly Lutzomyia longipalpis cDNA clone NSFM-30d10, mRNA sequence.Length=1091	Score = 298 bits (161), Expect = 2e-077
Contig28873	F1UMNMG01BFROT	Length=485	No Hit					emb|AM101241.1| AM101241 Lutzomyia longipalpis Jacobina whole fly Lutzomyia longipalpis cDNA clone NSFM-30d10, mRNA sequence.Length=1325	Score = 292 bits (158), Expect = 1e-075
Contig26544	F1UMNMG01BENHZ	Length=410	tr|Q16YC2|Q16YC2_AEDAE Tep3 (negative regulation of endopeptidase activity) OS=Aedes aegypti GN=AAEL008607 PE=4 SV=1Length=1451	Score = 123 bits (309), Expect = 1e-026	negative regulation of endopeptidase activity	endopeptidase inhibitor activity	extracellular space	emb|AM104592.1| AM104592 Lutzomyia longipalpis Jacobina whole fly Lutzomyia longipalpis cDNA clone NSFM-143h01, mRNA sequence.Length=1223	Score = 586 bits (317), Expect = 3e-164
Contig26544	F1UMNMG01BEYRU	Length=501	tr|Q16YC2|Q16YC2_AEDAE Tep3 (negative regulation of endopeptidase activity) OS=Aedes aegypti GN=AAEL008607 PE=4 SV=1Length=1451	Score = 152 bits (384), Expect(2) = 2e-044	negative regulation of endopeptidase activity	endopeptidase inhibitor activity	extracellular space	emb|AM104594.1| AM104594 Lutzomyia longipalpis Jacobina whole fly Lutzomyia longipalpis cDNA clone NSFM-79f04, mRNA sequence.Length=1408	Score = 802 bits (434), Expect = 0.0
Contig25609	F1UMNMG01BXHVW	Length=552	No Hit					No Hit
Contig25609	F1UMNMG01BT8MR	Length=554	No Hit					No Hit
Contig24935	F1UMNMG01COS0O	Length=300	No Hit					emb|AM101223.1| AM101223 Lutzomyia longipalpis Jacobina whole fly Lutzomyia longipalpis cDNA clone NSFM-29g07, mRNA sequence.Length=1422	Score = 472 bits (255), Expect = 7e-130
Contig24935	F1UMNMG01BJ5TH	Length=480	tr|B3ME14|B3ME14_DROAN GF13508 OS=Drosophila ananassae GN=GF13508 PE=4 SV=1Length=548	Score = 53.9 bits (128), Expect(2) = 1e-008				emb|AM098509.1| AM098509 Lutzomyia longipalpis Jacobina whole fly Lutzomyia longipalpis cDNA clone NSFM-29g07, mRNA sequence.Length=1379	Score = 780 bits (422), Expect = 0.0
Contig22853	F1UMNMG01CKXPO	Length=610	No Hit					No Hit
Contig22853	F1UMNMG01CD3I4	Length=567	No Hit					No Hit
Contig21417	F1UMNMG01BQBVC	Length=547	tr|E3WVT8|E3WVT8_ANODA Putative uncharacterized protein (malate dehydrogenase 2; cellular carbohydrate metabolic process) OS=Anopheles darlingi GN=AND_07877 PE=3 SV=1Length=1337	Score = 142 bits (357), Expect(2) = 2e-038	carbohydrate metabolic process; malate metabolic process	L-malate dehydrogenase activity; nucleic acid binding; nucleotide binding; zinc ion binding	intracellular	emb|AM100366.1| AM100366 Lutzomyia longipalpis Jacobina whole fly Lutzomyia longipalpis cDNA clone NSFM-164d01, mRNA sequence.Length=1369	Score = 887 bits (480), Expect = 0.0
Contig21417	F1UMNMG01AONX6	Length=546	tr|Q7PYE7|Q7PYE7_ANOGA AGAP001903-PA (Mitochondrial malate dehydrogenase 2; cellular carbohydrate metabolic process) OS=Anopheles gambiae GN=AGAP001903 PE=3 SV=4Length=337	Score = 182 bits (463), Expect = 2e-044	cellular carbohydrate metabolic process; malate metabolic process	L-malate dehydrogenase activity; nucleotide binding		emb|AM100366.1| AM100366 Lutzomyia longipalpis Jacobina whole fly Lutzomyia longipalpis cDNA clone NSFM-164d01, mRNA sequence.Length=1369	Score = 872 bits (472), Expect = 0.0
Contig20522	F1UMNMG01BYC4O	Length=540	No Hit					gb|EW989821.1| LJGFIL9_D02 Adult female Lutzomyia longipalpis midgut library blood fed containing Leishmania chagasi Lutzomyia longipalpis cDNA, mRNA sequence.Length=774	Score = 294 bits (159), Expect = 3e-076
Contig20522	F1UMNMG01CDZB1	Length=570	No Hit					gb|EW989821.1| LJGFIL9_D02 Adult female Lutzomyia longipalpis midgut library blood fed containing Leishmania chagasi Lutzomyia longipalpis cDNA, mRNA sequence.Length=774	Score = 298 bits (161), Expect = 3e-077
Contig19222	F1UMNMG01BYYMI	Length=388	No Hit					emb|AM097061.1| AM097061 Lutzomyia longipalpis Jacobina whole fly Lutzomyia longipalpis cDNA clone NSFM-05h02, mRNA sequence.Length=1142	Score = 300 bits (162), Expect = 5e-078
Contig19222	F1UMNMG01AQ8OU	Length=395	No Hit					emb|AM097061.1| AM097061 Lutzomyia longipalpis Jacobina whole fly Lutzomyia longipalpis cDNA clone NSFM-05h02, mRNA sequence.Length=1142	Score = 313 bits (169), Expect = 6e-082
Contig17984	F1UMNMG01B00RQ	Length=471	tr|A7UU65|A7UU65_ANOGA AGAP006260-PD (Z band alternatively spliced PDZ-motif protein 66, isoform I; mesoderm development) OS=Anopheles gambiae GN=AGAP006260 PE=4 SV=1Length=243	Score = 106 bits (265), Expect = 2e-021				emb|AM107770.1| AM107770 Lutzomyia longipalpis Jacobina whole fly Lutzomyia longipalpis cDNA clone NSFM-85h05, mRNA sequence.Length=1196	Score = 606 bits (328), Expect = 3e-170
Contig17984	F1UMNMG01CHPZU	Length=268	tr|Q86BH6|Q86BH6_DROME Z band alternatively spliced PDZ-motif protein 66, isoform I (mesoderm development) OS=Drosophila melanogaster GN=Zasp66 PE=2 SV=1Length=215	Score = 73.2 bits (178), Expect = 2e-011	mesoderm development		Z disc	emb|AM107766.1| AM107766 Lutzomyia longipalpis Jacobina whole fly Lutzomyia longipalpis cDNA clone NSFM-153e11, mRNA sequence.Length=1473	Score = 267 bits (144), Expect = 3e-068
Contig17585	F1UMNMG01CG0I7	Length=498	tr|Q7PS03|Q7PS03_ANOGA AGAP000579-PA (cholesterol transport) OS=Anopheles gambiae GN=AgaP_AGAP000579 PE=4 SV=5Length=1279	Score = 53.5 bits (127), Expect(2) = 6e-015	cholesterol transport	hedgehog receptor activity	integral to membrane	No Hit
Contig17585	F1UMNMG01BLJ79	Length=495	tr|Q7PS03|Q7PS03_ANOGA AGAP000579-PA (cholesterol transport) OS=Anopheles gambiae GN=AgaP_AGAP000579 PE=4 SV=5Length=1279	Score = 53.5 bits (127), Expect(2) = 1e-010	cholesterol transport	hedgehog receptor activity	integral to membrane	No Hit
Contig14207	F1UMNMG01CIJ19	Length=516	tr|H9JGA4|H9JGA4_BOMMO Uncharacterized protein (belongs to the heat shock protein 70 family) OS=Bombyx mori PE=4 SV=1Length=908	Score = 61.6 bits (148), Expect(2) = 4e-017		ATP binding		emb|AM095113.1| AM095113 Lutzomyia longipalpis Jacobina whole fly Lutzomyia longipalpis cDNA clone SFM-01e11, mRNA sequence.Length=1107	Score = 442 bits (239), Expect = 1e-120
Contig14207	F1UMNMG01A4WJJ	Length=539	tr|Q7PYB0|Q7PYB0_ANOGA AGAP001827-PA (belongs to the heat shock protein 70 family) OS=Anopheles gambiae GN=AgaP_AGAP001827 PE=3 SV=3Length=968	Score = 155 bits (391), Expect(3) = 9e-051		ATP binding		emb|AM095113.1| AM095113 Lutzomyia longipalpis Jacobina whole fly Lutzomyia longipalpis cDNA clone SFM-01e11, mRNA sequence.Length=1107	Score = 446 bits (241), Expect = 8e-122
Contig12345	F1UMNMG01BBJ15	Length=350	No Hit					emb|AM097061.1| AM097061 Lutzomyia longipalpis Jacobina whole fly Lutzomyia longipalpis cDNA clone NSFM-05h02, mRNA sequence.Length=1142	Score = 219 bits (118), Expect = 1e-053
Contig12345	F1UMNMG01BUXZP	Length=610	No Hit					emb|AM097061.1| AM097061 Lutzomyia longipalpis Jacobina whole fly Lutzomyia longipalpis cDNA clone NSFM-05h02, mRNA sequence.Length=1142	Score = 340 bits (184), Expect = 4e-090
Contig10488	F1UMNMG01COQFW	Length=593	No Hit					No Hit
Contig10488	F1UMNMG01A36JR	Length=542	No Hit					emb|AM102137.1| AM102137 Lutzomyia longipalpis Jacobina whole fly Lutzomyia longipalpis cDNA clone NSFM-121e05, mRNA sequence.Length=1061	Score = 274 bits (148), Expect = 4e-070
Contig9755	F1UMNMG01AVRXN	Length=294	No Hit					No Hit
Contig9695	F1UMNMG01AXEGR	Length=489	tr|B4Q7Y4|B4Q7Y4_DROSI GD21867 (Bicaudal-D_microtubule-assoc; BicD proteins are involved in dynein-mediated minus end-directed transport from the Golgi apparatus to the endoplasmic reticulum) OS=Drosophila simulans GN=GD21867 PE=4 SV=1Length=784	Score = 122 bits (305), Expect(2) = 2e-031	transport		Golgi apparatus	No Hit
Contig9365	F1UMNMG01A3N9G	Length=461	No Hit					gb|EW995639.1| LJGU-M-5_E01 Adult female Lutzomyia longipalpis midgut library sugar fed Lutzomyia longipalpis cDNA, mRNA sequence.Length=559	Score = 265 bits (143), Expect = 2e-067
Contig9179	F1UMNMG01CO03Z	Length=573	tr|B3MKY9|B3MKY9_DROAN GF14935 (Bicaudal C, isoform B; Contains 2 KH domains; the KH domain binds RNA, and can function in RNA recognition) OS=Drosophila ananassae GN=GF14935 PE=4 SV=1Length=938	Score = 77.8 bits (190), Expect = 1e-012		RNA binding		No Hit
Contig8847	F1UMNMG01ATM4R	Length=339	No Hit					gb|EW989297.1| LJGFIL2_E10 Adult female Lutzomyia longipalpis midgut library blood fed containing Leishmania chagasi Lutzomyia longipalpis cDNA, mRNA sequence.Length=968	Score = 379 bits (205), Expect = 5e-102
Contig870	F1UMNMG01BC7ZE	Length=424	No Hit					No Hit
Contig8506	F1UMNMG01CIMU6	Length=418	tr|B4P902|B4P902_DROYA Domino (ATP binding; DNA binding; helicase activity) OS=Drosophila yakuba GN=dom PE=4 SV=1Length=3195	Score = 102 bits (253), Expect = 4e-020		ATP binding; DNA binding; helicase activity		No Hit
Contig8325	F1UMNMG01CH1SP	Length=481	tr|H9IEF4|H9IEF4_ATTCE Uncharacterized protein (Multidrug resistance protein 2 [Atp-binding cassette protein c]) OS=Atta cephalotes PE=4 SV=1Length=1587	Score = 106 bits (265), Expect = 2e-021	ATP catabolic process; chloride transport	ATP binding; ATPase activity, coupled to transmembrane movement of substances; chloride channel activity	integral to membrane	No Hit
Contig7838	F1UMNMG01BOQ4E	Length=527	tr|E3WM83|E3WM83_ANODA Putative uncharacterized protein (F-box only protein; protein ubiquitination) OS=Anopheles darlingi GN=AND_02054 PE=3 SV=1Length=1991	Score = 195 bits (495), Expect(2) = 4e-066	protein ubiquitination	ubiquitin-protein ligase activity; zinc ion binding		gb|GW816392.1| PPRGFL_P4_D10 PPRGF Phlebotomus perniciosus cDNA, mRNA sequence.Length=977	Score = 531 bits (287), Expect = 2e-147
Contig7570	F1UMNMG01CDP7H	Length=474	No Hit					emb|AM098160.1| AM098160 Lutzomyia longipalpis Jacobina whole fly Lutzomyia longipalpis cDNA clone NSFM-11f05, mRNA sequence.Length=1097	Score = 315 bits (170), Expect = 2e-082
Contig7490	F1UMNMG01A5CM7	Length=584	No Hit					emb|AM097061.1| AM097061 Lutzomyia longipalpis Jacobina whole fly Lutzomyia longipalpis cDNA clone NSFM-05h02, mRNA sequence.Length=1142	Score = 305 bits (165), Expect = 2e-079
Contig7145	F1UMNMG01B82AB	Length=467	No Hit					gb|EW995639.1| LJGU-M-5_E01 Adult female Lutzomyia longipalpis midgut library sugar fed Lutzomyia longipalpis cDNA, mRNA sequence.Length=559	Score = 248 bits (134), Expect = 2e-062
Contig7114	F1UMNMG01AOQSE	Length=501	No Hit					No Hit
Contig6920	F1UMNMG01CM08G	Length=542	No Hit					emb|AM101241.1| AM101241 Lutzomyia longipalpis Jacobina whole fly Lutzomyia longipalpis cDNA clone NSFM-30d10, mRNA sequence.Length=1325	Score = 292 bits (158), Expect = 1e-075
Contig6702	F1UMNMG01A9KYQ	Length=579	No Hit					emb|AM101241.1| AM101241 Lutzomyia longipalpis Jacobina whole fly Lutzomyia longipalpis cDNA clone NSFM-30d10, mRNA sequence.Length=1325	Score = 213 bits (115), Expect = 1e-051
Contig6640	F1UMNMG01BYPCI	Length=617	No Hit					No Hit
Contig6552	F1UMNMG01CNGQ6	Length=575	tr|Q291L7|Q291L7_DROPS GA21076 (CWC16; eukaryotic proteins with undetermined function belonging to the CWC16 family) OS=Drosophila pseudoobscura pseudoobscura GN=GA21076 PE=4 SV=2Length=319	Score = 130 bits (326), Expect = 2e-028				emb|AM105291.1| AM105291 Lutzomyia longipalpis Jacobina whole fly Lutzomyia longipalpis cDNA clone NSFM-128a04, mRNA sequence.Length=1321	Score = 313 bits (169), Expect = 9e-082
Contig6481	F1UMNMG01BTPDW	Length=567	No Hit					emb|AM097061.1| AM097061 Lutzomyia longipalpis Jacobina whole fly Lutzomyia longipalpis cDNA clone NSFM-05h02, mRNA sequence.Length=1142	Score = 322 bits (174), Expect = 1e-084
Contig5923	F1UMNMG01BW859	Length=1259	No Hit					emb|AM101241.1| AM101241 Lutzomyia longipalpis Jacobina whole fly Lutzomyia longipalpis cDNA clone NSFM-30d10, mRNA sequence.Length=1325	Score = 340 bits (184), Expect = 9e-090
Contig5707	F1UMNMG01ANL1C	Length=511	No Hit					No Hit
Contig5650	F1UMNMG01AY2BW	Length=408	No Hit					emb|AM093850.1| AM093850 Lutzomyia longipalpis Jacobina whole fly Lutzomyia longipalpis cDNA clone NSFM-165d10, mRNA sequence.Length=1378	Score = 255 bits (138), Expect = 1e-064
Contig55	F1UMNMG01BN5OD	Length=573	No Hit					gb|EW989821.1| LJGFIL9_D02 Adult female Lutzomyia longipalpis midgut library blood fed containing Leishmania chagasi Lutzomyia longipalpis cDNA, mRNA sequence.Length=774	Score = 281 bits (152), Expect = 3e-072
Contig5378	F1UMNMG01BT42O	Length=530	tr|G7K0E5|G7K0E5_MEDTR Putative uncharacterized protein OS=Medicago truncatula GN=MTR_5g051150 PE=4 SV=1Length=2133	Score = 82.4 bits (202), Expect = 3e-014				emb|FP595913.1| FP595913 Hirudo medicinalis normalized library Hirudo medicinalis cDNA, mRNA sequence.Length=540	Score = 281 bits (152), Expect = 2e-072
Contig5109	F1UMNMG01COD2A	Length=535	tr|B4M8E2|B4M8E2_DROVI GJ16794 (zinc ion binding) OS=Drosophila virilis GN=GJ16794 PE=4 SV=1Length=5248	Score = 83.6 bits (205), Expect(3) = 9e-021		zinc ion binding		No Hit
Contig5018	F1UMNMG01BUXQG	Length=661	No Hit					No Hit
Contig4960	F1UMNMG01ANQ45	Length=487	No Hit					No Hit
Contig4865	F1UMNMG01A27WJ	Length=491	No Hit					emb|AM102138.1| AM102138 Lutzomyia longipalpis Jacobina whole fly Lutzomyia longipalpis cDNA clone NSFM-121e05, mRNA sequence.Length=1366	Score = 396 bits (214), Expect = 7e-107
Contig4537	F1UMNMG01APHP7	Length=342	No Hit					No Hit
Contig444	F1UMNMG01BUSKD	Length=517	tr|D0UR85|D0UR85_ISCVE Glycogen synthase (Fragment) OS=Ischnura verticalis PE=2 SV=1Length=303	Score = 202 bits (514), Expect(2) = 7e-072	glycogen biosynthetic process	glycogen (starch) synthase activity		emb|AM105247.1| AM105247 Lutzomyia longipalpis Jacobina whole fly Lutzomyia longipalpis cDNA clone NSFM-116b09, mRNA sequence.Length=1285	Score = 483 bits (261), Expect = 6e-133
Contig4116	F1UMNMG01BPRTM	Length=562	No Hit					No Hit
Contig3896	F1UMNMG01CNPWR	Length=467	tr|B4N5X0|B4N5X0_DROWI Belongs to the sodium:neurotransmitter symporter (SNF) family; OS=Drosophila willistoni GN=GK17955 PE=3 SV=1Length=750	Score = 183 bits (465), Expect(2) = 8e-051		neurotransmitter:sodium symporter activity	integral to membrane	No Hit
Contig3834	F1UMNMG01AY8DM	Length=499	tr|Q178E8|Q178E8_AEDAE ATP-binding cassette transporter OS=Aedes aegypti GN=AAEL005929 PE=3 SV=1Length=1413	Score = 133 bits (335), Expect(3) = 4e-043	ATP catabolic process	ATP binding; ATPase activity, coupled to transmembrane movement of substances	integral to membrane	No Hit
Contig3796	F1UMNMG01BD3NC	Length=611	No Hit					No Hit
Contig35622	F1UMNMG01B1B2H	Length=536	No Hit					emb|AM097061.1| AM097061 Lutzomyia longipalpis Jacobina whole fly Lutzomyia longipalpis cDNA clone NSFM-05h02, mRNA sequence.Length=1142	Score = 311 bits (168), Expect = 3e-081
Contig35572	F1UMNMG01BCBB9	Length=465	tr|H9HCJ2|H9HCJ2_ATTCE Uncharacterized protein (Nesprin-1 [nuclear envelope spectrin repeat]; Actin-binding) OS=Atta cephalotes PE=4 SV=1Length=7090	Score = 195 bits (495), Expect = 3e-048				No Hit
Contig35571	F1UMNMG01BH4H0	Length=454	tr|H9HCJ2|H9HCJ2_ATTCE Uncharacterized protein (Nesprin-1 [nuclear envelope spectrin repeat]; Actin-binding) OS=Atta cephalotes PE=4 SV=1Length=7090	Score = 65.9 bits (159), Expect(2) = 3e-018				No Hit
Contig3525	F1UMNMG01BLH07	Length=410	No Hit					emb|AM106486.1| AM106486 Lutzomyia longipalpis Jacobina whole fly Lutzomyia longipalpis cDNA clone NSFM-41d08, mRNA sequence.Length=1343	Score = 536 bits (290), Expect = 3e-149
Contig35212	F1UMNMG01BXU87	Length=279	No Hit					emb|AM101241.1| AM101241 Lutzomyia longipalpis Jacobina whole fly Lutzomyia longipalpis cDNA clone NSFM-30d10, mRNA sequence.Length=1325	Score = 268 bits (145), Expect = 9e-069
Contig34993	F1UMNMG01B1P9L	Length=509	No Hit					emb|AM101240.1| AM101240 Lutzomyia longipalpis Jacobina whole fly Lutzomyia longipalpis cDNA clone NSFM-30d10, mRNA sequence.Length=1091	Score = 300 bits (162), Expect = 6e-078
Contig34935	F1UMNMG01BZT0I	Length=496	tr|H9HCC6|H9HCC6_ATTCE Uncharacterized protein (Fragment) (protein serine/threonine kinase activity; ATP binding) OS=Atta cephalotes PE=4 SV=1Length=705	Score = 214 bits (546), Expect = 4e-054				No Hit
Contig34912	F1UMNMG01BKZGS	Length=564	tr|Q94977|Q94977_LUCCU PC2-like prohormone convertase (Belongs to the peptidase S8 family; proteolysis; serine-type endopeptidase activity) OS=Lucilia cuprina PE=2 SV=1Length=675	Score = 72.4 bits (176), Expect = 4e-011	proteolysis	serine-type endopeptidase activity		No Hit
Contig34911	F1UMNMG01A8UPG	Length=564	No Hit					No Hit
Contig3422	F1UMNMG01B5IL8	Length=394	No Hit					emb|AM101241.1| AM101241 Lutzomyia longipalpis Jacobina whole fly Lutzomyia longipalpis cDNA clone NSFM-30d10, mRNA sequence.Length=1325	Score = 287 bits (155), Expect = 4e-074
Contig33946	F1UMNMG01A6MJ0	Length=758	No Hit					No Hit
Contig33875	F1UMNMG01AXQRI	Length=486	tr|Q17BQ6|Q17BQ6_AEDAE Cyclin g OS=Aedes aegypti GN=AAEL004865 PE=3 SV=1Length=476	Score = 99.0 bits (245), Expect(2) = 2e-035				emb|AM092776.1| AM092776 Lutzomyia longipalpis Jacobina whole fly Lutzomyia longipalpis cDNA clone NSFM-43a02, mRNA sequence.Length=1110	Score = 715 bits (387), Expect = 0.0
Contig33295	F1UMNMG01B7AXM	Length=511	tr|B4JYB4|B4JYB4_DROGR GH14264 (Serine/threonine-protein phosphatase 4 regulatory subunit) OS=Drosophila grimshawi GN=GH14264 PE=4 SV=1Length=1040	Score = 114 bits (286), Expect(2) = 9e-046				gb|EX211972.1| ALYTINFA04F04 Lutzomyia longipalpis Infected Lutzomyia longipalpis cDNA 5', mRNA sequence.Length=659	Score = 819 bits (443), Expect = 0.0
Contig33264	F1UMNMG01A4VKJ	Length=571	No Hit					emb|AM101241.1| AM101241 Lutzomyia longipalpis Jacobina whole fly Lutzomyia longipalpis cDNA clone NSFM-30d10, mRNA sequence.Length=1325	Score = 327 bits (177), Expect = 3e-086
Contig32976	F1UMNMG01BTZ01	Length=524	tr|Q16UP6|Q16UP6_AEDAE Putative uncharacterized protein (Fragment) (Dpr7, isoform D; sensory perception of chemical stimulus) OS=Aedes aegypti GN=AAEL009841 PE=4 SV=1Length=200	Score = 117 bits (292), Expect = 1e-024				emb|AM090009.1| AM090009 Lutzomyia longipalpis Jacobina whole fly Lutzomyia longipalpis cDNA clone NSFM-20g09, mRNA sequence.Length=1209	Score = 702 bits (380), Expect = 0.0
Contig32940	F1UMNMG01B6WN7	Length=472	tr|E1JHJ5|E1JHJ5_DROME Myosin heavy chain, isoform P OS=Drosophila melanogaster GN=Mhc PE=4 SV=1Length=1949	Score = 219 bits (559), Expect = 1e-055	ATP catabolic process	ATP binding; ATPase activity; motor activity	myosin filament	emb|AM109365.1| AM109365 Lutzomyia longipalpis Jacobina whole fly Lutzomyia longipalpis cDNA clone NSFM-35c06, mRNA sequence.Length=1239	Score = 815 bits (441), Expect = 0.0
Contig32134	F1UMNMG01CDEYK	Length=497	tr|B0W4H2|B0W4H2_CULQU Myosin-VIIa OS=Culex quinquefasciatus GN=CpipJ_CPIJ001741 PE=4 SV=1Length=2076	Score = 137 bits (345), Expect(2) = 5e-059		ATP binding; motor activity	myosin complex	No Hit
Contig31004	F1UMNMG01BUSUW	Length=417	tr|Q171S2|Q171S2_AEDAE Vacuolar protein sorting-associated protein (Vps13d) (Fragment); Proteins in this entry may play a role in the control of protein cycling through the trans-Golgi network OS=Aedes aegypti GN=AAEL007551 PE=4 SV=1Length=3926	Score = 122 bits (307), Expect = 2e-026	protein localization			No Hit
Contig30997	F1UMNMG01BY220	Length=506	No Hit					emb|AM098160.1| AM098160 Lutzomyia longipalpis Jacobina whole fly Lutzomyia longipalpis cDNA clone NSFM-11f05, mRNA sequence.Length=1097	Score = 241 bits (130), Expect = 4e-060
Contig30839	F1UMNMG01A23S1	Length=596	No Hit					gb|EW995639.1| LJGU-M-5_E01 Adult female Lutzomyia longipalpis midgut library sugar fed Lutzomyia longipalpis cDNA, mRNA sequence.Length=559	Score = 235 bits (127), Expect = 2e-058
Contig30706	F1UMNMG01A0EUJ	Length=586	No Hit					No Hit
Contig30690	F1UMNMG01B6SRG	Length=504	tr|B4MYN1|B4MYN1_DROWI Elongation factor 1-alpha (Protein biosynthesis) OS=Drosophila willistoni GN=GK22048 PE=3 SV=1Length=463	Score = 195 bits (495), Expect = 3e-048	GTP catabolic process	GTP binding; GTPase activity; translation elongation factor activity	cytoplasm	emb|AM097515.1| AM097515 Lutzomyia longipalpis Jacobina whole fly Lutzomyia longipalpis cDNA clone NSFM-98c09, mRNA sequence.Length=956	Score = 843 bits (456), Expect = 0.0
Contig30505	F1UMNMG01BK1L1	Length=570	No Hit					gb|EW995639.1| LJGU-M-5_E01 Adult female Lutzomyia longipalpis midgut library sugar fed Lutzomyia longipalpis cDNA, mRNA sequence.Length=559	Score = 235 bits (127), Expect = 2e-058
Contig29936	F1UMNMG01B3NY4	Length=1536	No Hit					emb|AM101241.1| AM101241 Lutzomyia longipalpis Jacobina whole fly Lutzomyia longipalpis cDNA clone NSFM-30d10, mRNA sequence.Length=1325	Score = 226 bits (122), Expect = 3e-055
Contig2993	F1UMNMG01A5ZOF	Length=424	No Hit					emb|AM101240.1| AM101240 Lutzomyia longipalpis Jacobina whole fly Lutzomyia longipalpis cDNA clone NSFM-30d10, mRNA sequence.Length=1091	Score = 281 bits (152), Expect = 2e-072
Contig29662	F1UMNMG01APHOY	Length=475	No Hit					emb|AM101241.1| AM101241 Lutzomyia longipalpis Jacobina whole fly Lutzomyia longipalpis cDNA clone NSFM-30d10, mRNA sequence.Length=1325	Score = 279 bits (151), Expect = 8e-072
Contig29430	F1UMNMG01CNE97	Length=543	No Hit					gb|EW995639.1| LJGU-M-5_E01 Adult female Lutzomyia longipalpis midgut library sugar fed Lutzomyia longipalpis cDNA, mRNA sequence.Length=559	Score = 233 bits (126), Expect = 7e-058
Contig29342	F1UMNMG01A75GZ	Length=331	tr|B0W745|B0W745_CULQU Retinoid-inducible serine carboxypeptidase (proteolysis) OS=Culex quinquefasciatus GN=CpipJ_CPIJ002911 PE=4 SV=1Length=446	Score = 134 bits (337), Expect = 7e-030	proteolysis	serine-type carboxypeptidase activity		emb|AM098344.1| AM098344 Lutzomyia longipalpis Jacobina whole fly Lutzomyia longipalpis cDNA clone NSFM-83a06, mRNA sequence.Length=1156	Score = 424 bits (229), Expect = 2e-115
Contig29322	F1UMNMG01AVT0H	Length=871	No Hit					No Hit
Contig29248	F1UMNMG01BYZ3V	Length=451	No Hit					No Hit
Contig28934	F1UMNMG01CBR3L	Length=488	tr|Q16KW5|Q16KW5_AEDAE Forkhead box, sub-group O, putative (transcription factor) OS=Aedes aegypti GN=AAEL012847 PE=4 SV=1Length=403	Score = 196 bits (497), Expect = 2e-048				No Hit
Contig28677	F1UMNMG01BDORY	Length=509	tr|B0WEB3|B0WEB3_CULQU Fatty acid synthase S-acetyltransferase (biosynthetic process) OS=Culex quinquefasciatus GN=CpipJ_CPIJ005595 PE=4 SV=1Length=2419	Score = 74.7 bits (182), Expect(2) = 1e-014	biosynthetic process	3-hydroxypalmitoyl-[acyl-carrier-protein] dehydratase activity; 3-oxoacyl-[acyl-carrier-protein] synthase activity; [acyl-carrier-protein] S-acetyltransferase activity; nucleotide binding; zinc ion binding		emb|AM105896.1| AM105896 Lutzomyia longipalpis Jacobina whole fly Lutzomyia longipalpis cDNA clone NSFM-106f09, mRNA sequence.Length=1346	Score = 614 bits (332), Expect = 2e-172
Contig28581	F1UMNMG01CHSBJ	Length=444	tr|Q17F22|Q17F22_AEDAE Purine biosynthesis protein 6, pur6 ('de novo' IMP biosynthetic process) OS=Aedes aegypti GN=AAEL003606 PE=4 SV=1Length=427	Score = 187 bits (475), Expect = 7e-046	de novo' IMP biosynthetic process	5-(carboxyamino)imidazole ribonucleotide mutase activity; ATP binding; phosphoribosylaminoimidazolesuccinocarboxamide synthase activity		emb|AM103237.1| AM103237 Lutzomyia longipalpis Jacobina whole fly Lutzomyia longipalpis cDNA clone NSFM-118c03, mRNA sequence.Length=1400	Score = 623 bits (337), Expect = 3e-175
Contig28541	F1UMNMG01BM2MQ	Length=546	tr|B3N0J2|B3N0J2_DROAN GF21709 (Microsomal glutathione S-transferase-like, isoform B; MAPEG-like_dom; This domain is found in a widespread superfamily known as MAPEG (Membrane Associated Proteins in Eicosanoid and Glutathione metabolism) OS=Drosophila ananassae GN=GF21709 PE=4 SV=1Length=195	Score = 109 bits (272), Expect = 3e-022				gb|EW990920.1| LJGFIS32_F12 Adult female Lutzomyia longipalpis midgut library blood fed containing Leishmania chagasi Lutzomyia longipalpis cDNA, mRNA sequence.Length=600	Score = 545 bits (295), Expect = 8e-152
Contig28381	F1UMNMG01B7YHP	Length=477	No Hit					No Hit
Contig28177	F1UMNMG01BS7X2	Length=542	tr|Q7PVH2|Q7PVH2_ANOGA AGAP009278-PA (Phosphorylase b kinase beta; glycogen metabolic process) OS=Anopheles gambiae GN=AGAP009278 PE=4 SV=4Length=1065	Score = 125 bits (314), Expect = 4e-027	glycogen metabolic process	hydrolase activity, hydrolyzing O-glycosyl compounds		emb|AM098160.1| AM098160 Lutzomyia longipalpis Jacobina whole fly Lutzomyia longipalpis cDNA clone NSFM-11f05, mRNA sequence.Length=1097	Score = 316 bits (171), Expect = 7e-083
Contig2800	F1UMNMG01CPWQT	Length=316	No Hit					gb|EW989176.1| LJGFIL10_A02 Adult female Lutzomyia longipalpis midgut library blood fed containing Leishmania chagasi Lutzomyia longipalpis cDNA, mRNA sequence.Length=835	Score = 453 bits (245), Expect = 3e-124
Contig27841	F1UMNMG01B2P8G	Length=544	No Hit					No Hit
Contig27781	F1UMNMG01ANXVR	Length=340	tr|Q16KT4|Q16KT4_AEDAE Putative uncharacterized protein (COPII vesicle coating; the addition of COPII proteins and adaptor proteins to ER membranes during the formation of transport vesicles, forming a vesicle coat) OS=Aedes aegypti GN=AAEL012880 PE=4 SV=1Length=802	Score = 104 bits (260), Expect = 6e-021	COPII vesicle coating			No Hit
Contig27738	F1UMNMG01BSGWG	Length=396	No Hit					emb|AM097061.1| AM097061 Lutzomyia longipalpis Jacobina whole fly Lutzomyia longipalpis cDNA clone NSFM-05h02, mRNA sequence.Length=1142	Score = 318 bits (172), Expect = 1e-083
Contig27608	F1UMNMG01B4XG8	Length=526	No Hit					emb|AM101399.1| AM101399 Lutzomyia longipalpis Jacobina whole fly Lutzomyia longipalpis cDNA clone NSFM-125c11, mRNA sequence.Length=1413	Score = 270 bits (146), Expect = 5e-069
Contig27281	F1UMNMG01B7VQJ	Length=501	tr|Q7Q8C2|Q7Q8C2_ANOGA AGAP008698-PA (Fragment) (Chromodomain-helicase-DNA-binding protein 1; ATP-dependent helicase activity, DNA binding, ATP binding) OS=Anopheles gambiae GN=AGAP008698 PE=4 SV=4Length=2083	Score = 138 bits (348), Expect = 4e-031		ATP binding; ATP-dependent helicase activity; DNA binding	nucleus	No Hit
Contig27098	F1UMNMG01CAWK2	Length=500	No Hit					emb|AM095844.1| AM095844 Lutzomyia longipalpis Jacobina whole fly Lutzomyia longipalpis cDNA clone NSFM-163d12, mRNA sequence.Length=1316	Score = 566 bits (306), Expect = 5e-158
Contig26867	F1UMNMG01B1OLX	Length=495	tr|G8FU55|G8FU55_APIME Hunchback (Znf_C2H2/integrase_DNA-bd; this entry represents the C2H2-type zinc finger domain [11], as well as the DNA-binding domain of certain integrases) OS=Apis mellifera GN=hb PE=2 SV=1Length=646	Score = 180 bits (456), Expect = 1e-043		nucleic acid binding; zinc ion binding	intracellular	emb|AM090886.1| AM090886 Lutzomyia longipalpis Jacobina whole fly Lutzomyia longipalpis cDNA clone NSFM-21c03, mRNA sequence.Length=1260	Score = 582 bits (315), Expect = 5e-163
Contig26764	F1UMNMG01A04BJ	Length=538	tr|D3TMM8|D3TMM8_GLOMM Ras suppressor protein (This gene encodes a protein that is involved in the Ras signal transduction pathway, growth inhibition, and nerve-growth factor induced differentiation processes) OS=Glossina morsitans morsitans PE=2 SV=1Length=289	Score = 182 bits (463), Expect(3) = 3e-067				emb|AM093599.1| AM093599 Lutzomyia longipalpis Jacobina whole fly Lutzomyia longipalpis cDNA clone NSFM-01d12, mRNA sequence.Length=1022	Score = 850 bits (460), Expect = 0.0
Contig26736	F1UMNMG01BQS9X	Length=578	No Hit					gb|EW995639.1| LJGU-M-5_E01 Adult female Lutzomyia longipalpis midgut library sugar fed Lutzomyia longipalpis cDNA, mRNA sequence.Length=559	Score = 259 bits (140), Expect = 1e-065
Contig26704	F1UMNMG01CE54U	Length=507	No Hit					No Hit
Contig26611	F1UMNMG01APBDT	Length=500	tr|Q7QHI8|Q7QHI8_ANOGA AGAP011201-PA (Fragment) (TLC-dom; Transmembrane helix; Proteins containing this domain may possess multiple functions such as lipid trafficking, metabolism, or sensing) OS=Anopheles gambiae GN=AGAP011201 PE=4 SV=4Length=113	Score = 65.5 bits (158), Expect(2) = 4e-021				gb|EW993169.1| LJGDIM22_F05 Adult female Lutzomyia longipalpis midgut library post blood meal digestion containing Leishmania chagasi Lutzomyia longipalpis cDNA, mRNA sequence.Length=1045	Score = 795 bits (430), Expect = 0.0
Contig26610	F1UMNMG01BRP8X	Length=574	No Hit					No Hit
Contig26497	F1UMNMG01BTNRK	Length=552	No Hit					emb|AM101399.1| AM101399 Lutzomyia longipalpis Jacobina whole fly Lutzomyia longipalpis cDNA clone NSFM-125c11, mRNA sequence.Length=1413	Score = 230 bits (124), Expect = 9e-057
Contig2647	F1UMNMG01CH78C	Length=563	No Hit					emb|AM097061.1| AM097061 Lutzomyia longipalpis Jacobina whole fly Lutzomyia longipalpis cDNA clone NSFM-05h02, mRNA sequence.Length=1142	Score = 326 bits (176), Expect = 1e-085
Contig26442	F1UMNMG01AXR9S	Length=502	No Hit					No Hit
Contig26071	F1UMNMG01AY59V	Length=511	No Hit					No Hit
Contig25986	F1UMNMG01BK71K	Length=388	No Hit					emb|AM097061.1| AM097061 Lutzomyia longipalpis Jacobina whole fly Lutzomyia longipalpis cDNA clone NSFM-05h02, mRNA sequence.Length=1142	Score = 291 bits (157), Expect = 3e-075
Contig25566	F1UMNMG01B4WQ2	Length=558	tr|B4PJH9|B4PJH9_DROYA Dihydrolipoyl dehydrogenase, belongs to the class-I pyridine nucleotide-disulfide oxidoreductase family (cell redox homeostasis) OS=Drosophila yakuba GN=GE19931 PE=3 SV=1Length=504	Score = 216 bits (551), Expect = 1e-054	cell redox homeostasis	dihydrolipoyl dehydrogenase activity; flavin adenine dinucleotide binding	cytoplasm	emb|AM103935.1| AM103935 Lutzomyia longipalpis Jacobina whole fly Lutzomyia longipalpis cDNA clone NSFM-57h11, mRNA sequence.Length=1201	Score = 900 bits (487), Expect = 0.0
Contig25449	F1UMNMG01BJVW1	Length=449	No Hit					gb|EW989821.1| LJGFIL9_D02 Adult female Lutzomyia longipalpis midgut library blood fed containing Leishmania chagasi Lutzomyia longipalpis cDNA, mRNA sequence.Length=774	Score = 270 bits (146), Expect = 4e-069
Contig25058	F1UMNMG01CG15R	Length=344	No Hit					emb|AM101241.1| AM101241 Lutzomyia longipalpis Jacobina whole fly Lutzomyia longipalpis cDNA clone NSFM-30d10, mRNA sequence.Length=1325	Score = 307 bits (166), Expect = 2e-080
Contig24973	F1UMNMG01BRF00	Length=581	No Hit					No Hit
Contig24571	F1UMNMG01CCYPC	Length=535	No Hit					No Hit
Contig24426	F1UMNMG01BBCMG	Length=522	No Hit					No Hit
Contig24422	F1UMNMG01AZIBO	Length=487	tr|B0W404|B0W404_CULQU Chorion peroxidase (response to oxidative stress) OS=Culex quinquefasciatus GN=CpipJ_CPIJ001764 PE=4 SV=1Length=685	Score = 160 bits (404), Expect = 1e-037	response to oxidative stress	heme binding; peroxidase activity		emb|AM104644.1| AM104644 Lutzomyia longipalpis Jacobina whole fly Lutzomyia longipalpis cDNA clone NSFM-65e06, mRNA sequence.Length=1281	Score = 737 bits (399), Expect = 0.0
Contig24258	F1UMNMG01BZGBR	Length=490	tr|B0W015|B0W015_CULQU Serine-type protease inhibitor (proteolysis) OS=Culex quinquefasciatus GN=CpipJ_CPIJ000379 PE=4 SV=1Length=1032	Score = 74.3 bits (181), Expect = 9e-012	proteolysis	peptidase activity		No Hit
Contig24012	F1UMNMG01CNG83	Length=363	No Hit					No Hit
Contig23764	F1UMNMG01A54OL	Length=563	No Hit					emb|AM097061.1| AM097061 Lutzomyia longipalpis Jacobina whole fly Lutzomyia longipalpis cDNA clone NSFM-05h02, mRNA sequence.Length=1142	Score = 324 bits (175), Expect = 4e-085
Contig23521	F1UMNMG01BUNQJ	Length=506	tr|Q16KZ7|Q16KZ7_AEDAE Transcription factor E2f, putative (DE2F) (transcription, DNA-dependent) OS=Aedes aegypti GN=AAEL012817 PE=3 SV=1Length=662	Score = 68.2 bits (165), Expect = 6e-010	transcription, DNA-dependent	DNA binding; sequence-specific DNA binding transcription factor activity	transcription factor complex	emb|AM095029.1| AM095029 Lutzomyia longipalpis Jacobina whole fly Lutzomyia longipalpis cDNA clone NSFM-35h06, mRNA sequence.Length=1235	Score = 492 bits (266), Expect = 1e-135
Contig23452	F1UMNMG01B1X4T	Length=586	No Hit					No Hit
Contig23288	F1UMNMG01BL95V	Length=469	tr|Q16T27|Q16T27_AEDAE Beclin (autophagy, the process in which cells digest parts of their own cytoplasm; allows for both recycling of macromolecular constituents under conditions of cellular stress and remodeling the intracellular structure for cell differentiation) OS=Aedes aegypti GN=AAEL010427 PE=4 SV=1Length=426	Score = 169 bits (427), Expect = 3e-040	autophagy			emb|AM092621.1| AM092621 Lutzomyia longipalpis Jacobina whole fly Lutzomyia longipalpis cDNA clone NSFM-135a04, mRNA sequence.Length=1356	Score = 673 bits (364), Expect = 0.0
Contig23188	F1UMNMG01A3VX0	Length=370	No Hit					emb|AM097061.1| AM097061 Lutzomyia longipalpis Jacobina whole fly Lutzomyia longipalpis cDNA clone NSFM-05h02, mRNA sequence.Length=1142	Score = 285 bits (154), Expect = 1e-073
Contig23004	F1UMNMG01B528B	Length=544	No Hit					No Hit
Contig22934	F1UMNMG01BJSE2	Length=458	tr|E3WN74|E3WN74_ANODA Putative uncharacterized protein (SH3 domain-binding protein 5 (SH3BP5); the SH3 domain-binding protein inhibits the auto and transphophorylation of BTK and acts as a negative regulator of BTK-related signalling in B cells; is involved in JNK cascade, a cascade of protein kinase activities, culminating in the phosphorylation and activation of a member of the JUN kinase subf…	Score = 84.0 bits (206), Expect(2) = 1e-024				No Hit
Contig22837	F1UMNMG01CLESE	Length=524	No Hit					emb|AM095936.1| AM095936 Lutzomyia longipalpis Jacobina whole fly Lutzomyia longipalpis cDNA clone NSFM-56a05, mRNA sequence.Length=1277	Score = 595 bits (322), Expect = 7e-167
Contig22698	F1UMNMG01BFRXP	Length=315	No Hit					emb|AM101241.1| AM101241 Lutzomyia longipalpis Jacobina whole fly Lutzomyia longipalpis cDNA clone NSFM-30d10, mRNA sequence.Length=1325	Score = 329 bits (178), Expect = 5e-087
Contig22415	F1UMNMG01BTTS2	Length=509	No Hit					No Hit
Contig22354	F1UMNMG01AVUI9	Length=405	No Hit					emb|AM101241.1| AM101241 Lutzomyia longipalpis Jacobina whole fly Lutzomyia longipalpis cDNA clone NSFM-30d10, mRNA sequence.Length=1325	Score = 292 bits (158), Expect = 8e-076
Contig22047	F1UMNMG01AV5TV	Length=510	No Hit					No Hit
Contig21991	F1UMNMG01AWE45	Length=526	No Hit					No Hit
Contig21696	F1UMNMG01BF3YC	Length=608	No Hit					emb|AM101240.1| AM101240 Lutzomyia longipalpis Jacobina whole fly Lutzomyia longipalpis cDNA clone NSFM-30d10, mRNA sequence.Length=1091	Score = 337 bits (182), Expect = 6e-089
Contig21255	F1UMNMG01CD8GK	Length=511	tr|Q16MH2|Q16MH2_AEDAE Putative uncharacterized protein (Anoctamin; This family contains the anoctamin/TMEM16 proteins which are thought to be calcium-dependent chloride channel) OS=Aedes aegypti GN=AAEL012293 PE=4 SV=1Length=863	Score = 64.7 bits (156), Expect(4) = 1e-026				gb|ES348556.1| PPINFM-P7-E11 P. papatasi adult female blood fed with L. major midgut library Phlebotomus papatasi cDNA, mRNA sequence.Length=600	Score = 353 bits (191), Expect = 5e-094
Contig21135	F1UMNMG01CBJU7	Length=674	No Hit					No Hit
Contig20905	F1UMNMG01A7K9H	Length=502	tr|Q0IFH5|Q0IFH5_AEDAE Phd finger protein (Zinc_finger_PHD-type_CS; this entry represents the PHD (homeodomain) zinc finger domain, which is a C4HC3 zinc-finger-like motif found in nuclear proteins thought to be involved in chromatin-mediated transcriptional regulation) OS=Aedes aegypti GN=AAEL004834 PE=4 SV=1Length=2274	Score = 73.9 bits (180), Expect = 1e-011		zinc ion binding		No Hit
Contig2085	F1UMNMG01BSRJP	Length=535	No Hit					No Hit
Contig20345	F1UMNMG01BOIY0	Length=621	No Hit					emb|AM101241.1| AM101241 Lutzomyia longipalpis Jacobina whole fly Lutzomyia longipalpis cDNA clone NSFM-30d10, mRNA sequence.Length=1325	Score = 226 bits (122), Expect = 1e-055
Contig19908	F1UMNMG01B0XAO	Length=533	tr|Q17F89|Q17F89_AEDAE Putative uncharacterized protein (Fragment) (Zinc finger, C2H2-like; This entry represents the classical C2H2 zinc finger domain; Zinc finger (Znf) domains are now recognised to bind DNA, RNA, protein and/or lipid substrates) OS=Aedes aegypti GN=AAEL003489 PE=4 SV=1Length=781	Score = 54.3 bits (129), Expect(2) = 4e-007		zinc ion binding	intracellular	emb|AM106700.1| AM106700 Lutzomyia longipalpis Jacobina whole fly Lutzomyia longipalpis cDNA clone NSFM-95f09, mRNA sequence.Length=1281	Score = 209 bits (113), Expect = 1e-050
Contig19798	F1UMNMG01A3UUY	Length=290	No Hit					gb|EW995639.1| LJGU-M-5_E01 Adult female Lutzomyia longipalpis midgut library sugar fed Lutzomyia longipalpis cDNA, mRNA sequence.Length=559	Score = 244 bits (132), Expect = 2e-061
Contig19763	F1UMNMG01B6X66	Length=632	No Hit					emb|AM101399.1| AM101399 Lutzomyia longipalpis Jacobina whole fly Lutzomyia longipalpis cDNA clone NSFM-125c11, mRNA sequence.Length=1413	Score = 270 bits (146), Expect = 6e-069
Contig19724	F1UMNMG01AS9IU	Length=667	No Hit					No Hit
Contig19657	F1UMNMG01CHQ7L	Length=522	No Hit					emb|AM101241.1| AM101241 Lutzomyia longipalpis Jacobina whole fly Lutzomyia longipalpis cDNA clone NSFM-30d10, mRNA sequence.Length=1325	Score = 279 bits (151), Expect = 8e-072
Contig1916	F1UMNMG01B83GT	Length=512	tr|F1NGA2|F1NGA2_CHICK ATP synthase subunit alpha (Fragment) (ATP hydrolysis and synthesis coupled proton transport) OS=Gallus gallus GN=ATP5A1 PE=3 SV=1Length=555	Score = 263 bits (671), Expect(2) = 1e-068	ATP hydrolysis coupled proton transport; ATP synthesis coupled proton transport	proton-transporting ATPase activity, rotational mechanism; hydrogen ion transporting ATP synthase activity, rotational mechanism; ATP binding	proton-transporting ATP synthase complex, catalytic core F(1)	emb|AM089288.1| AM089288 Lutzomyia longipalpis Jacobina whole fly Lutzomyia longipalpis cDNA clone NSFM-05b11, mRNA sequence.Length=1177	Score = 852 bits (461), Expect = 0.0
Contig18462	F1UMNMG01BL9LK	Length=600	No Hit					No Hit
Contig17834	F1UMNMG01APER7	Length=580	No Hit					emb|AM098160.1| AM098160 Lutzomyia longipalpis Jacobina whole fly Lutzomyia longipalpis cDNA clone NSFM-11f05, mRNA sequence.Length=1097	Score = 274 bits (148), Expect = 4e-070
Contig17549	F1UMNMG01BM7KW	Length=504	tr|Q1HQV5|Q1HQV5_AEDAE Mitochondrial aldehyde dehydrogenase (oxidoreductase activity, acting on the aldehyde or oxo group of donors, NAD or NADP as acceptor) OS=Aedes aegypti PE=2 SV=1Length=516	Score = 182 bits (463), Expect(2) = 1e-057		oxidoreductase activity, acting on the aldehyde or oxo group of donors, NAD or NADP as acceptor		emb|AM100213.1| AM100213 Lutzomyia longipalpis Jacobina whole fly Lutzomyia longipalpis cDNA clone NSFM-149b07, mRNA sequence.Length=1181	Score = 760 bits (411), Expect = 0.0
Contig17546	F1UMNMG01AZIHV	Length=485	tr|Q7PMK0|Q7PMK0_ANOGA AGAP010767-PA (Fragment) (intracellular signal transduction; regulation of Rho protein signal transduction; termination of G-protein coupled receptor signaling pathway; The members of the Rho GTPase family have been shown to regulate many aspects of intracellular actin dynamics, have been described as "molecular switches" and play a role in cell proliferation, apoptosis, ge…	Score = 67.0 bits (162), Expect = 1e-009	intracellular signal transduction; regulation of Rho protein signal transduction; termination of G-protein coupled receptor signaling pathway	Rho guanyl-nucleotide exchange factor activity; metal ion binding; phospholipid binding	cytoplasm	No Hit
Contig17419	F1UMNMG01ASFWP	Length=486	No Hit					emb|AM101241.1| AM101241 Lutzomyia longipalpis Jacobina whole fly Lutzomyia longipalpis cDNA clone NSFM-30d10, mRNA sequence.Length=1325	Score = 294 bits (159), Expect = 3e-076
Contig17349	F1UMNMG01AP4UM	Length=434	No Hit					gb|EW995639.1| LJGU-M-5_E01 Adult female Lutzomyia longipalpis midgut library sugar fed Lutzomyia longipalpis cDNA, mRNA sequence.Length=559	Score = 219 bits (118), Expect = 2e-053
Contig17303	F1UMNMG01A50BS	Length=563	No Hit					emb|AM097061.1| AM097061 Lutzomyia longipalpis Jacobina whole fly Lutzomyia longipalpis cDNA clone NSFM-05h02, mRNA sequence.Length=1142	Score = 318 bits (172), Expect = 2e-083
Contig16804	F1UMNMG01B3GQ0	Length=528	No Hit					emb|AM097311.1| AM097311 Lutzomyia longipalpis Jacobina whole fly Lutzomyia longipalpis cDNA clone NSFM-28b05, mRNA sequence.Length=1231	Score = 586 bits (317), Expect = 4e-164
Contig16244	F1UMNMG01AZXP5	Length=637	No Hit					No Hit
Contig16168	F1UMNMG01A7GLK	Length=474	tr|B5DKT1|B5DKT1_DROPS GA22778 (Znf_RING; zinc ion binding; E3 ubiquitin-protein ligase activity is intrinsic to the RING domain of c-Cbl and is likely to be a general function of this domain; Various RING fingers exhibit binding activity towards E2 ubiquitin-conjugating enzymes) OS=Drosophila pseudoobscura pseudoobscura GN=GA22778 PE=4 SV=1Length=1611	Score = 94.4 bits (233), Expect = 8e-018		zinc ion binding		emb|AM098160.1| AM098160 Lutzomyia longipalpis Jacobina whole fly Lutzomyia longipalpis cDNA clone NSFM-11f05, mRNA sequence.Length=1097	Score = 224 bits (121), Expect = 4e-055
Contig15380	F1UMNMG01BA73D	Length=298	No Hit					gb|EW993522.1| LJGDIM27_B06 Adult female Lutzomyia longipalpis midgut library post blood meal digestion containing Leishmania chagasi Lutzomyia longipalpis cDNA, mRNA sequence.Length=380	Score = 449 bits (243), Expect = 3e-123
Contig1520	F1UMNMG01A7BAZ	Length=477	tr|B0W5T7|B0W5T7_CULQU E3 ubiquitin-protein ligase HECTD1 (ubiquitin-protein ligase activity; metal ion binding) OS=Culex quinquefasciatus GN=CpipJ_CPIJ002462 PE=4 SV=1Length=2813	Score = 158 bits (400), Expect = 3e-037		ubiquitin-protein ligase activity; metal ion binding	intracellular	No Hit
Contig15123	F1UMNMG01CC8PO	Length=549	No Hit					emb|AM101399.1| AM101399 Lutzomyia longipalpis Jacobina whole fly Lutzomyia longipalpis cDNA clone NSFM-125c11, mRNA sequence.Length=1413	Score = 263 bits (142), Expect = 9e-067
Contig14835	F1UMNMG01CFDKE	Length=495	No Hit					No Hit
Contig14511	F1UMNMG01CKH7P	Length=455	No Hit					emb|AM101241.1| AM101241 Lutzomyia longipalpis Jacobina whole fly Lutzomyia longipalpis cDNA clone NSFM-30d10, mRNA sequence.Length=1325	Score = 315 bits (170), Expect = 2e-082
Contig13948	F1UMNMG01BF0S0	Length=445	No Hit					No Hit
Contig13812	F1UMNMG01CJS7W	Length=553	tr|B4N317|B4N317_DROWI GK12606 (Ig_I-set; Ig-like domains are involved in a variety of functions, including cell-cell recognition, cell-surface receptors, muscle structure and the immune system) OS=Drosophila willistoni GN=GK12606 PE=4 SV=1Length=2718	Score = 90.1 bits (222), Expect(2) = 5e-026				No Hit
Contig13649	F1UMNMG01AM6EK	Length=482	tr|B0WP74|B0WP74_CULQU Putative uncharacterized protein (Myosin-rhogap protein; intracellular signal transduction) OS=Culex quinquefasciatus GN=CpipJ_CPIJ008896 PE=4 SV=1Length=1030	Score = 251 bits (642), Expect = 3e-065	intracellular signal transduction	motor activity; ATP binding; metal ion binding	myosin complex	No Hit
Contig13641	F1UMNMG01B40VJ	Length=454	No Hit					No Hit
Contig13552	F1UMNMG01B8CXN	Length=588	tr|E3X463|E3X463_ANODA Putative uncharacterized protein (Putative fatty acid synthase S-acetyltransferase; biosynthetic process) OS=Anopheles darlingi GN=AND_13167 PE=4 SV=1Length=1517	Score = 89.4 bits (220), Expect = 4e-016	biosynthetic process	3-hydroxypalmitoyl-[acyl-carrier-protein] dehydratase activity; 3-oxoacyl-[acyl-carrier-protein] synthase activity; [acyl-carrier-protein] S-acetyltransferase activity; nucleotide binding; zinc ion binding		No Hit
Contig13418	F1UMNMG01B8PHS	Length=285	No Hit					No Hit
Contig1333	F1UMNMG01AR7UI	Length=529	No Hit					No Hit
Contig13207	F1UMNMG01CJD5U	Length=394	No Hit					emb|AM097061.1| AM097061 Lutzomyia longipalpis Jacobina whole fly Lutzomyia longipalpis cDNA clone NSFM-05h02, mRNA sequence.Length=1142	Score = 246 bits (133), Expect = 6e-062
Contig13151	F1UMNMG01BCITK	Length=407	No Hit					emb|AM101241.1| AM101241 Lutzomyia longipalpis Jacobina whole fly Lutzomyia longipalpis cDNA clone NSFM-30d10, mRNA sequence.Length=1325	Score = 289 bits (156), Expect = 1e-074
Contig13044	F1UMNMG01A2LVB	Length=483	tr|B0WLA2|B0WLA2_CULQU Exocyst complex component 3 (Sec6 is a component of the multiprotein exocyst complex. Exocyst proteins localise to regions of active exocytosis in an F-actin-dependent and exocytosis- independent manner) OS=Culex quinquefasciatus GN=CpipJ_CPIJ007822 PE=4 SV=1Length=717	Score = 173 bits (439), Expect(2) = 1e-057				No Hit
Contig12975	F1UMNMG01BJS2J	Length=568	No Hit					emb|AM098160.1| AM098160 Lutzomyia longipalpis Jacobina whole fly Lutzomyia longipalpis cDNA clone NSFM-11f05, mRNA sequence.Length=1097	Score = 255 bits (138), Expect = 2e-064
Contig12664	F1UMNMG01CFUGV	Length=535	No Hit					gb|EW989821.1| LJGFIL9_D02 Adult female Lutzomyia longipalpis midgut library blood fed containing Leishmania chagasi Lutzomyia longipalpis cDNA, mRNA sequence.Length=774	Score = 294 bits (159), Expect = 3e-076
Contig12582	F1UMNMG01CD0Z4	Length=532	No Hit					No Hit
Contig12467	F1UMNMG01A2XMT	Length=556	No Hit					emb|AM097061.1| AM097061 Lutzomyia longipalpis Jacobina whole fly Lutzomyia longipalpis cDNA clone NSFM-05h02, mRNA sequence.Length=1142	Score = 340 bits (184), Expect = 4e-090
Contig12445	F1UMNMG01BNCPT	Length=436	No Hit					No Hit
Contig12234	F1UMNMG01CNK5B	Length=554	No Hit					gb|EW995639.1| LJGU-M-5_E01 Adult female Lutzomyia longipalpis midgut library sugar fed Lutzomyia longipalpis cDNA, mRNA sequence.Length=559	Score = 220 bits (119), Expect = 5e-054
Contig1207	F1UMNMG01CHL1X	Length=469	tr|B4H5Z4|B4H5Z4_DROPE GL24674 (nucleic acid binding, zinc ion binding) OS=Drosophila persimilis GN=GL24674 PE=4 SV=1Length=987	Score = 75.9 bits (185), Expect(2) = 8e-028		nucleic acid binding; zinc ion binding	intracellular	No Hit
Contig12069	F1UMNMG01CMI34	Length=502	tr|Q16TW3|Q16TW3_AEDAE Putative uncharacterized protein (Maternal protein exuperantia; Ensures the proper localization of the mRNA of the bicoid gene to the anterior regions of the oocyte thus playing a fundamental role in the establishment of the polarity of the oocyte. May bind the bcd mRNA; multicellular organismal development) OS=Aedes aegypti GN=AAEL010097 PE=4 SV=1Length=599	Score = 50.1 bits (118), Expect(3) = 6e-015				emb|AM106045.1| AM106045 Lutzomyia longipalpis Jacobina whole fly Lutzomyia longipalpis cDNA clone NSFM-108c01, mRNA sequence.Length=906	Score = 713 bits (386), Expect = 0.0
Contig11812	F1UMNMG01BDVU9	Length=609	No Hit					No Hit
Contig11457	F1UMNMG01B4SOQ	Length=486	No Hit					emb|AM097061.1| AM097061 Lutzomyia longipalpis Jacobina whole fly Lutzomyia longipalpis cDNA clone NSFM-05h02, mRNA sequence.Length=1142	Score = 259 bits (140), Expect = 1e-065
Contig11400	F1UMNMG01BWO6C	Length=305	No Hit					No Hit
Contig11303	F1UMNMG01CEB5N	Length=379	No Hit					gb|EW989821.1| LJGFIL9_D02 Adult female Lutzomyia longipalpis midgut library blood fed containing Leishmania chagasi Lutzomyia longipalpis cDNA, mRNA sequence.Length=774	Score = 294 bits (159), Expect = 2e-076
Contig11254	F1UMNMG01B4FJV	Length=253	No Hit					No Hit
Contig11246	F1UMNMG01BAWME	Length=488	No Hit					No Hit
Contig1088	F1UMNMG01COYF9	Length=584	No Hit					emb|AM097061.1| AM097061 Lutzomyia longipalpis Jacobina whole fly Lutzomyia longipalpis cDNA clone NSFM-05h02, mRNA sequence.Length=1142	Score = 307 bits (166), Expect = 4e-080
Contig10464	F1UMNMG01CKO2G	Length=624	No Hit					No Hit
Contig10435	F1UMNMG01BO447	Length=550	No Hit					emb|AM101241.1| AM101241 Lutzomyia longipalpis Jacobina whole fly Lutzomyia longipalpis cDNA clone NSFM-30d10, mRNA sequence.Length=1325	Score = 298 bits (161), Expect = 2e-077
Contig10109	F1UMNMG01AOQHZ	Length=460	tr|B4NFV5|B4NFV5_DROWI GK22457 (Contains 1 RING-type zinc finger; zinc ion binding; The function of this domain is not yet known but it could be involved in protein-protein interaction and be important for the assembly or activity of multicomponent complexes involved in transcriptional activation or repression) OS=Drosophila willistoni GN=GK22457 PE=4 SV=1Length=1120	Score = 182 bits (462), Expect(2) = 7e-050		zinc ion binding	intracellular	No Hit
Contig10107	F1UMNMG01B0UJ1	Length=544	tr|Q17FJ9|Q17FJ9_AEDAE Putative uncharacterized protein (putative salivary mucin; chitin metabolic process; chitin binding) OS=Aedes aegypti GN=AAEL003368 PE=4 SV=1Length=541	Score = 76.6 bits (187), Expect(2) = 4e-013				No Hit
Contig10041	F1UMNMG01BXB31	Length=405	No Hit					gb|EW996092.1| LJGUM-P02_A12 Adult female Lutzomyia longipalpis midgut library sugar fed Lutzomyia longipalpis cDNA, mRNA sequence.Length=258	Score = 390 bits (211), Expect = 3e-105
	F1UMNMG01BRP0O	Length=522	sp|P17336.2|CATA_DROME RecName: Full=Catalase (hydrogen peroxide catabolic process)	Score = 272 bits (695), Expect = 1e-87	determination of adult lifespan; hydrogen peroxide catabolic process; response to hydrogen peroxide	catalase activity	peroxisome			putative catalase [Lutzomyia longipalpis] ( hydrogen peroxide catabolic process)	Score = 354 bits (909), Expect = 4e-118
	F1UMNMG01APIYL	Length=352	sp|P00400.1|COX1_DROYA RecName: Full=Cytochrome c oxidase subunit 1	Score = 55.1 bits (131), Expect(3) = 1e-18	aerobic respiration; electron transport chain; oxidative phosphorylation	cytochrome-c oxidase activity;	integral to membrane; mitochondrial inner membrane			cytochrome oxidase subunit 1 [Sarcophaga dux]	Score = 57.4 bits (137), Expect(3) = 2e-18
	F1UMNMG01BTO68	Length=353	sp|P00400.1|COX1_DROYA RecName: Full=Cytochrome c oxidase subunit 1	Score = 48.1 bits (113), Expect(2) = 1e-07	aerobic respiration; electron transport chain; oxidative phosphorylation	cytochrome-c oxidase activity;	integral to membrane; mitochondrial inner membrane			cytochrome oxidase subunit I [Sarcophaga dux]	Score = 46.6 bits (109), Expect(2) = 4e-07
					Biological process	Molecular function	Cellular component
	F1UMNMG01BCRVO	Length=477	sp|Q8GTM0.1|DEF_NICAL RecName: Full=Flower-specific defensin/Q9XHE3 putative gamma-thionin precursor [Capsicum chinense] (defense response)	Score = 83.2 bits (204), Expect = 2e-19/Score = 130 bits (326), Expect = 7e-36	defense response to fungus; killing of cells of other organism		extracellular region; vacuole
	F1UMNMG01AZRFW	Length=551	sp|Q41963.2|TIP12_ARATH RecName: Full=Aquaporin TIP1-2; Belongs to the MIP/aquaporin family, transporter activity	Score = 144 bits (362), Expect(3) = 3e-46	defense response to bacterium; hydrogen peroxide transmembrane transport; water homeostasis	transporter activity	Golgi apparatus; endoplasmic reticulum; integral to membrane; plasma membrane; vacuolar membrane

## Sheet: Groups of genes_function
	SS1		Transcripts related to immunity
Contig21297	F1UMNMG01BFZX6	Length=538	tr|G7K0E9|G7K0E9_MEDTR Cytochrome P450 likeTBP OS=Medicago truncatula GN=MTR_5g051190 PE=4 SV=1Length=656	Score = 82.4 bits (202), Expect = 3e-014
Contig6260	F1UMNMG01ATCQS	Length=561	tr|E0W1Z3|E0W1Z3_PEDHC Breast cancer type 2 susceptibility protein brca2, putative; double-strand break repair via homologous recombination; regulation of S phase of mitotic cell cycle OS=Pediculus humanus subsp. corporis GN=Phum_PHUM580760 PE=4 SV=1Length=1405	Score = 129 bits (324), Expect = 3e-028	double-strand break repair via homologous recombination; regulation of S phase of mitotic cell cycle	single-stranded DNA binding	nucleus
Contig6260	F1UMNMG01CK70B	Length=550	tr|E0W1Z3|E0W1Z3_PEDHC Breast cancer type 2 susceptibility protein brca2, putative; double-strand break repair via homologous recombination; regulation of S phase of mitotic cell cycle OS=Pediculus humanus subsp. corporis GN=Phum_PHUM580760 PE=4 SV=1Length=1405	Score = 118 bits (295), Expect = 6e-025	double-strand break repair via homologous recombination; regulation of S phase of mitotic cell cycle	single-stranded DNA binding	nucleus
Contig26544	F1UMNMG01BENHZ	Length=410	tr|Q16YC2|Q16YC2_AEDAE Tep3 (negative regulation of endopeptidase activity) OS=Aedes aegypti GN=AAEL008607 PE=4 SV=1Length=1451	Score = 123 bits (309), Expect = 1e-026	negative regulation of endopeptidase activity	endopeptidase inhibitor activity	extracellular space
Contig26544	F1UMNMG01BEYRU	Length=501	tr|Q16YC2|Q16YC2_AEDAE Tep3 (negative regulation of endopeptidase activity) OS=Aedes aegypti GN=AAEL008607 PE=4 SV=1Length=1451	Score = 152 bits (384), Expect(2) = 2e-044	negative regulation of endopeptidase activity	endopeptidase inhibitor activity	extracellular space
Contig21417	F1UMNMG01BQBVC	Length=547	tr|E3WVT8|E3WVT8_ANODA Putative uncharacterized protein (malate dehydrogenase 2; cellular carbohydrate metabolic process) OS=Anopheles darlingi GN=AND_07877 PE=3 SV=1Length=1337	Score = 142 bits (357), Expect(2) = 2e-038	carbohydrate metabolic process; malate metabolic process	L-malate dehydrogenase activity; nucleic acid binding; nucleotide binding; zinc ion binding	intracellular
Contig21417	F1UMNMG01AONX6	Length=546	tr|Q7PYE7|Q7PYE7_ANOGA AGAP001903-PA (Mitochondrial malate dehydrogenase 2; cellular carbohydrate metabolic process) OS=Anopheles gambiae GN=AGAP001903 PE=3 SV=4Length=337	Score = 182 bits (463), Expect = 2e-044	cellular carbohydrate metabolic process; malate metabolic process	L-malate dehydrogenase activity; nucleotide binding
Contig14207	F1UMNMG01CIJ19	Length=516	tr|H9JGA4|H9JGA4_BOMMO Uncharacterized protein (belongs to the heat shock protein 70 family) OS=Bombyx mori PE=4 SV=1Length=908	Score = 61.6 bits (148), Expect(2) = 4e-017		ATP binding
Contig14207	F1UMNMG01A4WJJ	Length=539	tr|Q7PYB0|Q7PYB0_ANOGA AGAP001827-PA (belongs to the heat shock protein 70 family) OS=Anopheles gambiae GN=AgaP_AGAP001827 PE=3 SV=3Length=968	Score = 155 bits (391), Expect(3) = 9e-051		ATP binding
Contig8325	F1UMNMG01CH1SP	Length=481	tr|H9IEF4|H9IEF4_ATTCE Uncharacterized protein (Multidrug resistance protein 2 [Atp-binding cassette protein c]) OS=Atta cephalotes PE=4 SV=1Length=1587	Score = 106 bits (265), Expect = 2e-021	ATP catabolic process; chloride transport	ATP binding; ATPase activity, coupled to transmembrane movement of substances; chloride channel activity	integral to membrane
Contig34935	F1UMNMG01BZT0I	Length=496	tr|H9HCC6|H9HCC6_ATTCE Uncharacterized protein (Fragment) (protein serine/threonine kinase activity; ATP binding) OS=Atta cephalotes PE=4 SV=1Length=705	Score = 214 bits (546), Expect = 4e-054
Contig34912	F1UMNMG01BKZGS	Length=564	tr|Q94977|Q94977_LUCCU PC2-like prohormone convertase (Belongs to the peptidase S8 family; proteolysis; serine-type endopeptidase activity) OS=Lucilia cuprina PE=2 SV=1Length=675	Score = 72.4 bits (176), Expect = 4e-011	proteolysis	serine-type endopeptidase activity
Contig32976	F1UMNMG01BTZ01	Length=524	tr|Q16UP6|Q16UP6_AEDAE Putative uncharacterized protein (Fragment) (Dpr7, isoform D; sensory perception of chemical stimulus) OS=Aedes aegypti GN=AAEL009841 PE=4 SV=1Length=200	Score = 117 bits (292), Expect = 1e-024		F GO:0005515 protein binding
Contig29342	F1UMNMG01A75GZ	Length=331	tr|B0W745|B0W745_CULQU Retinoid-inducible serine carboxypeptidase (proteolysis) OS=Culex quinquefasciatus GN=CpipJ_CPIJ002911 PE=4 SV=1Length=446	Score = 134 bits (337), Expect = 7e-030	proteolysis	serine-type carboxypeptidase activity
Contig24422	F1UMNMG01AZIBO	Length=487	tr|B0W404|B0W404_CULQU Chorion peroxidase (response to oxidative stress) OS=Culex quinquefasciatus GN=CpipJ_CPIJ001764 PE=4 SV=1Length=685	Score = 160 bits (404), Expect = 1e-037	response to oxidative stress	heme binding; peroxidase activity
Contig24258	F1UMNMG01BZGBR	Length=490	tr|B0W015|B0W015_CULQU Serine-type protease inhibitor (proteolysis) OS=Culex quinquefasciatus GN=CpipJ_CPIJ000379 PE=4 SV=1Length=1032	Score = 74.3 bits (181), Expect = 9e-012	proteolysis	peptidase activity
Contig23288	F1UMNMG01BL95V	Length=469	tr|Q16T27|Q16T27_AEDAE Beclin ( autophagy, the process in which cells digest parts of their own cytoplasm; allows for both recycling of macromolecular constituents under conditions of cellular stress and remodeling the intracellular structure for cell differentiation) OS=Aedes aegypti GN=AAEL010427 PE=4 SV=1Length=426	Score = 169 bits (427), Expect = 3e-040	autophagy
Contig22934	F1UMNMG01BJSE2	Length=458	tr|E3WN74|E3WN74_ANODA Putative uncharacterized protein (SH3 domain-binding protein 5 (SH3BP5); the SH3 domain-binding protein inhibits the auto and transphophorylation of BTK and acts as a negative regulator of BTK-related signalling in B cells; is involved in JNK cascade, a cascade of protein kinase activities, culminating in the phosphorylation and activation of a member of the JUN kinase subf…	Score = 84.0 bits (206), Expect(2) = 1e-024		F GO:0017124 SH3 domain binding;
Contig13812	F1UMNMG01CJS7W	Length=553	tr|B4N317|B4N317_DROWI GK12606 isoform l (Ig_I-set; Ig-like domains are involved in a variety of functions, including cell-cell recognition, cell-surface receptors, muscle structure and the immune system) OS=Drosophila willistoni GN=GK12606 PE=4 SV=1Length=2718	Score = 90.1 bits (222), Expect(2) = 5e-026		F GO:0005515 protein binding
Contig13044	F1UMNMG01A2LVB	Length=483	tr|B0WLA2|B0WLA2_CULQU Exocyst complex component 3 (Sec6 is a component of the multiprotein exocyst complex. Exocyst proteins localise to regions of active exocytosis in an F-actin-dependent and exocytosis- independent manner) OS=Culex quinquefasciatus GN=CpipJ_CPIJ007822 PE=4 SV=1Length=717	Score = 173 bits (439), Expect(2) = 1e-057
Contig10107	F1UMNMG01B0UJ1	Length=544	tr|Q17FJ9|Q17FJ9_AEDAE Putative uncharacterized protein (putative salivary mucin; chitin metabolic process; chitin binding) OS=Aedes aegypti GN=AAEL003368 PE=4 SV=1Length=541	Score = 76.6 bits (187), Expect(2) = 4e-013
	F1UMNMG01BCRVO	Length=477	sp|Q8GTM0.1|DEF_NICAL RecName: Full=Flower-specific defensin/Q9XHE3 putative gamma-thionin precursor [Capsicum chinense] (defense response)	Score = 83.2 bits (204), Expect = 2e-19/Score = 130 bits (326), Expect = 7e-36	defense response to fungus; killing of cells of other organism		extracellular region; vacuole
	F1UMNMG01AZRFW	Length=551	sp|Q41963.2|TIP12_ARATH RecName: Full=Aquaporin TIP1-2; Belongs to the MIP/aquaporin family, transporter activity	Score = 144 bits (362), Expect(3) = 3e-46	defense response to bacterium; hydrogen peroxide transmembrane transport; water homeostasis	transporter activity	Golgi apparatus; endoplasmic reticulum; integral to membrane; plasma membrane; vacuolar membrane
	F1UMNMG01BRP0O	Length=522	sp|P17336.2|CATA_DROME RecName: Full=Catalase (hydrogen peroxide catabolic process)	Score = 272 bits (695), Expect = 1e-87	determination of adult lifespan; hydrogen peroxide catabolic process; response to hydrogen peroxide	catalase activity	peroxisome
